# Supplementary material for: Divergent oxidative dearomatization coupling reactions to construct polycyclic cyclohexadienones
Source: Royal Society of Chemistry journal article supplement (doi:10.1039/d2cc00183g), 2022-01-01
Supplement: d2cc00183g1.pdf [file d2cc00183g1.pdf]

## Supporting Information

### Divergent oxidative dearomatization coupling reactions to construct polycyclic cyclohexadienones

Qian Pu,<sup>†</sup> Mingming Huo,<sup>†</sup> Guojuan Liang,<sup>†</sup> Lijuan Bai, Genhui Chen, Hongjiao Li, Peng Xiang, Hui Zhou\*, Jing Zhou\*

*Chongqing Research Center for Pharmaceutical Engineering, Chongqing Key Laboratory of Biochemistry and Molecular Pharmacology, School of pharmacy, Chongqing Medical University, Chongqing 400016, China*

E-mail: [102792@cqmu.edu.cn](mailto:102792@cqmu.edu.cn).

### Table of Contents

|                                                                                                                  |    |
|------------------------------------------------------------------------------------------------------------------|----|
| 1. General Methods .....                                                                                         | 2  |
| 2. Optimization of other reaction conditions .....                                                               | 2  |
| 3. General procedure for the synthesis of <b>1</b> .....                                                         | 3  |
| 4. General procedure for the C-H oxidative dearomatization/Heck coupling reaction.                               | 3  |
| 5. General procedure for the C-H oxidative dearomatization/Ullman coupling reaction<br>.....                     | 4  |
| 6. General procedure for the oxidative dearomatization coupling reaction .....                                   | 5  |
| 7. Experimental procedure for the synthesis of <b>2a'</b> and <b>6</b> .....                                     | 6  |
| 8. Proposed reaction mechanism.....                                                                              | 6  |
| 9. Characterization Data of <b>1</b> , <b>2</b> , <b>2a'</b> , <b>3</b> , <b>4</b> , <b>5</b> and <b>6</b> ..... | 7  |
| 10. NMR Spectra.....                                                                                             | 30 |
| 11. Single-Crystal X-ray Crystallography of <b>2a'</b> , <b>3a</b> , <b>4a</b> and <b>5a</b> .....               | 96 |

## 1. General Methods

Various functional groups substituted ortho-hydroxyphenylsubstituted *p*-QMs **1** were prepared according to literature method<sup>1</sup>. Commercial grade solvents were dried and purified by standard procedures as specified in Purification of Laboratory Chemicals, 4th Ed (Armarego, W. L. F.; Perrin, D. D. Butterworth Heinemann: 1997). <sup>1</sup>H NMR spectra were recorded on commercial instruments (600 MHz). Chemical shifts were reported in ppm from tetramethylsilane with the solvent resonance as the internal standard (CDCl<sub>3</sub>, δ = 7.26). Spectra are reported as follows: chemical shift (δ ppm), multiplicity (s = singlet, d = doublet, t = triplet, q = quartet, m = multiplet), coupling constants (Hz), integration, and assignment. <sup>13</sup>C NMR spectra were collected on commercial instruments (150 MHz) with complete proton decoupling. Chemical shifts are reported in ppm from the tetramethylsilane with the solvent resonance as internal standard (CDCl<sub>3</sub>, δ = 77.0). Reactions were monitored by TLC and visualized with ultraviolet light. Mass spectra were recorded on Xevo G2-S QToF tandem mass spectrometer.

## References

1. K. Zhao, Y. Zhi, T. Shu, A. Valkonen, K. Rissanen, D. Enders. *Angew. Chem. Int. Ed.* **2016**, *55*, 12104-12108.

## 2. Optimization of other reaction conditions<sup>a</sup>

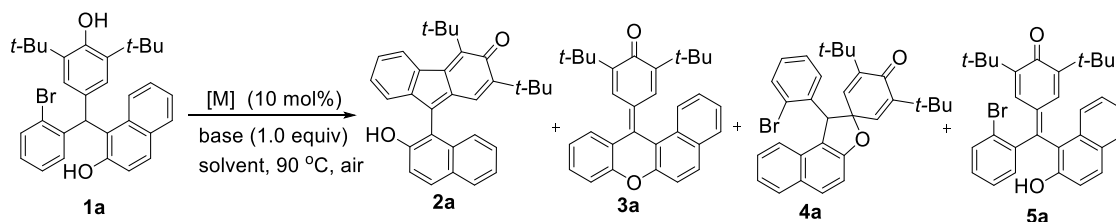

| Entry | Metal Complex                         | Base                            | solvent            | Time (h) | Yield of <b>2a/3a/4a/5a</b> (%) <sup>b</sup> |
|-------|---------------------------------------|---------------------------------|--------------------|----------|----------------------------------------------|
| 1     | Pd <sub>2</sub> (dba) <sub>3</sub>    | <i>t</i> -BuOK                  | toluene            | 3        | 95/-/-/trace                                 |
| 2     | Pd <sub>2</sub> (dba) <sub>3</sub>    | <i>t</i> -BuOK                  | CH <sub>3</sub> CN | 18       | 10/-/-/trace                                 |
| 3     | Pd <sub>2</sub> (dba) <sub>3</sub>    | <i>t</i> -BuOK                  | DMF                | 18       | 92/-/-/trace                                 |
| 4     | Cu(OAc) <sub>2</sub> H <sub>2</sub> O | Cs <sub>2</sub> CO <sub>3</sub> | toluene            | 72       | -/91/trace/-                                 |
| 5     | Cu(OTf) <sub>2</sub>                  | Cs <sub>2</sub> CO <sub>3</sub> | toluene            | 72       | -/83/trace/-                                 |
| 6     | CuI                                   | Cs <sub>2</sub> CO <sub>3</sub> | toluene            | 72       | -/82/trace/-                                 |
| 7     | Cu(OAc) <sub>2</sub> H <sub>2</sub> O | KOH                             | toluene            | 18       | -/99/-/-                                     |
| 8     | Cu(OAc) <sub>2</sub> H <sub>2</sub> O | KOH                             | CH <sub>3</sub> CN | 18       | -/95/-/-                                     |
| 9     | Cu(OAc) <sub>2</sub> H <sub>2</sub> O | KOH                             | DMF                | 18       | -/82/-/-                                     |

<sup>a</sup> Unless otherwise noted, reactions were conducted with 0.1 mmol **1a**, 10 mol % [M], 1.0 equiv base in 1.0 mL solvent, 90 °C, air. <sup>b</sup> Isolated yields.

### 3. General procedure for the synthesis of **1**

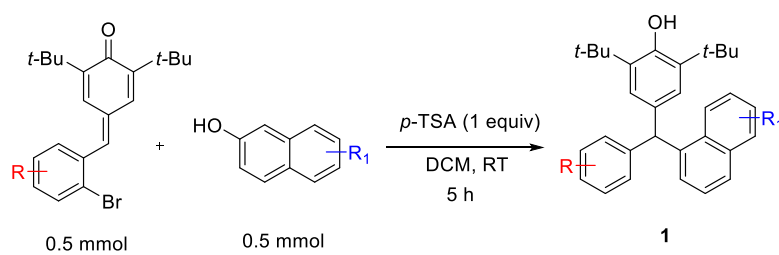

To a solution of *p*-QMs (0.5 mmol, 1 equiv) and β-Naphthol (0.5 mmol, 1 equiv) in DCM(5 mL), *p*-TSA(0.5 mmol, 1 equiv) was added. The reaction mixture was stirred for 5 hours at rt. Next, the solvent was removed under vacuum directly and the crude product was purified by silica gel column chromatography with ethyl acetate (EA) and petroleum ether (Pet) as eluent to afford the product **1**.

### 4. General procedure for the C-H oxidative dearomatization/Heck coupling reaction

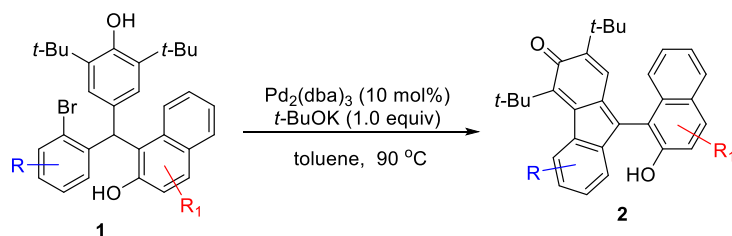

To a 10 mL test tube were added **1** (0.1 mmol, 1.0 equiv), *t*-BuOK (0.1 mmol, 1.0 equiv), Pd<sub>2</sub>(dba)<sub>3</sub> (10 mol%), toluene (1.0 mL). The mixture was then stirred at 90 °C for 3-12 hours (oil bath). After being cooled to room temperature, The solvent

was removed under vacuum directly and the crude product was purified by silica gel column chromatography to afford the product **2**.

### Scaled-up version of the reaction

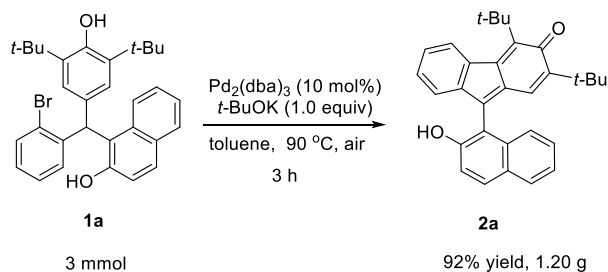

To a 10 mL test tube were added **1a** (3.0 mmol, 1.0 equiv), *t*-BuOK (3.0 mmol, 1.0 equiv), Pd<sub>2</sub>(dba)<sub>3</sub> (10 mol%), toluene (30.0 mL). The mixture was then stirred at 90 °C for 3 hours (oil bath). After being cooled to room temperature, The solvent was removed under vacuum directly and the crude product was purified by silica gel column chromatography to afford the product **2a** (92% yield, 1.20 g).

### 5. General procedure for the C-H oxidative dearomatization/Ullman coupling reaction

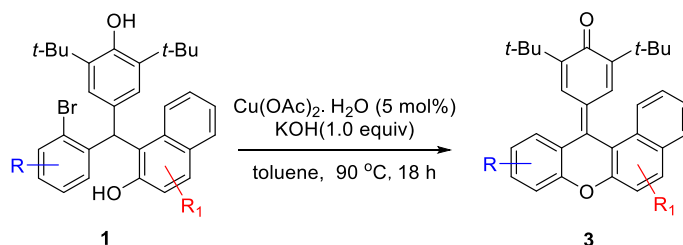

To a 10 mL test tube were added **1** (0.1 mmol, 1.0 equiv), KOH (0.1 mmol, 1.0 equiv), Cu(OAc)<sub>2</sub> (5 mol%), toluene (1.0 mL). The mixture was then stirred at 90 °C for 18 hours (oil bath). After being cooled to room temperature, The solvent was removed under vacuum directly and the crude product was purified by silica gel column chromatography to afford the product **3**.



## Scaled-up version of the reaction

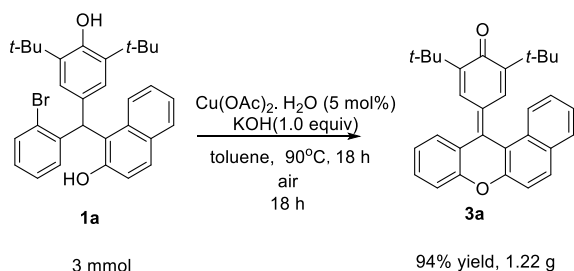

To a 10 mL test tube were added **1a** (3.0 mmol, 1.0 equiv),  $\text{KOH}$  (3.0 mmol, 1.0 equiv),  $\text{Cu}(\text{OAc})_2$  (5 mol%), toluene (30.0 mL). The mixture was then stirred at 90 °C for 18 hours (oil bath). After being cooled to room temperature, The solvent was removed under vacuum directly and the crude product was purified by silica gel column chromatography to afford the product **3a** (94% yield, 1.22 g).

## 6. General procedure for the oxidative dearomatization coupling reaction

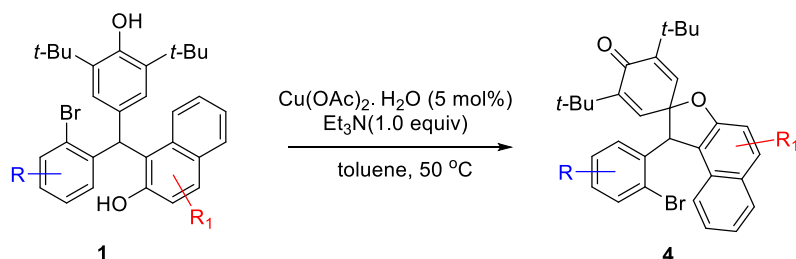

To a 10 mL test tube were added **1** (0.1 mmol, 1.0 equiv),  $\text{Et}_3\text{N}$  (0.1 mmol, 1.0 equiv),  $\text{Cu}(\text{OAc})_2 \cdot \text{H}_2\text{O}$  (5 mol%), toluene (1.0 mL). The mixture was then stirred at 50 °C for 5-7 hours (oil bath). After being cooled to room temperature, The solvent was removed under vacuum directly and the crude product was purified by silica gel column chromatography to afford the product **4**.

## Scaled-up version of the reaction

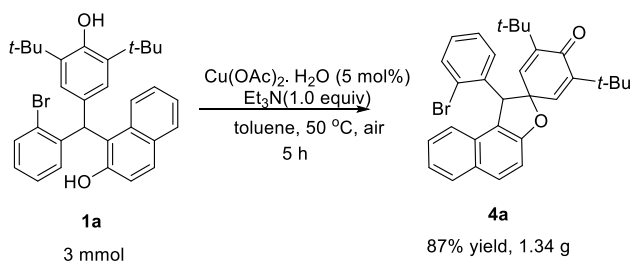

To a 10 mL test tube were added **1a** (3.0 mmol, 1.0 equiv),  $\text{Et}_3\text{N}$  (3.0 mmol, 1.0 equiv),  $\text{Cu}(\text{OAc})_2 \cdot \text{H}_2\text{O}$  (5 mol%), toluene (30.0 mL). The mixture was then stirred at 50 °C for 5 hours (oil bath). After being cooled to room temperature, The solvent was

removed under vacuum directly and the crude product was purified by silica gel column chromatography to afford the product **4a** (87% yield, 1.34 g).

## 7. Experimental procedure for the synthesis of **2a'** and **6**

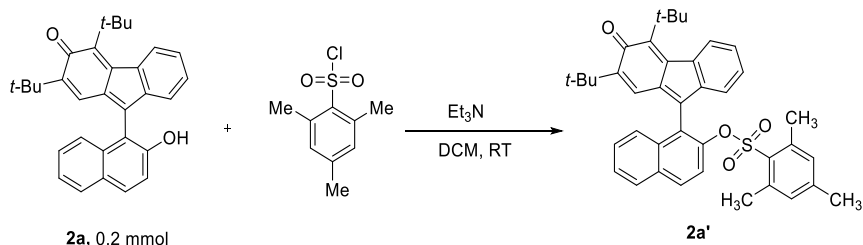

To a 10 mL test tube were added **2a** (0.2 mmol, 1.0 equiv) dissolved in DCM (5.0 mL), drop slowly Mesitylene-2-sulfonyl chloride (0.31 mmol, 1.1 equiv) and Et<sub>3</sub>N (0.31 mmol, 1.1 equiv). The mixture was then stirred at rt for about 2 hours. The crude product was recrystallized in the freezer by dissolving in CH<sub>3</sub>CN (1.0 mL) and overlaying with Toluene (2.0 mL). The product **2a'** was isolated as a red solid with 96% yield.

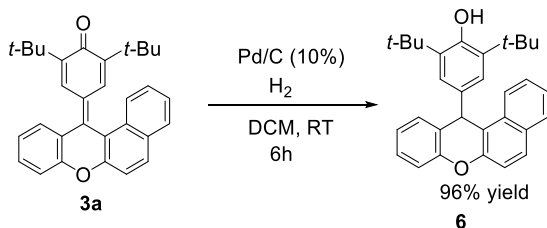

To a solution of **3a** (0.2 mmol, 1 equiv) in CH<sub>2</sub>Cl<sub>2</sub> (1 mL) was added Pd on carbon (6.0 mg, 10 wt%). The reaction mixture was degassed by a hydrogen balloon for 10 mins. Then the reaction was allowed to stir at room temperature for about 6 hours. Next, the solvent was removed under vacuum directly and the crude product was purified by silica gel column chromatography to afford the product **6** (96% yield, 83.7 mg).

## 8. Proposed reaction mechanism

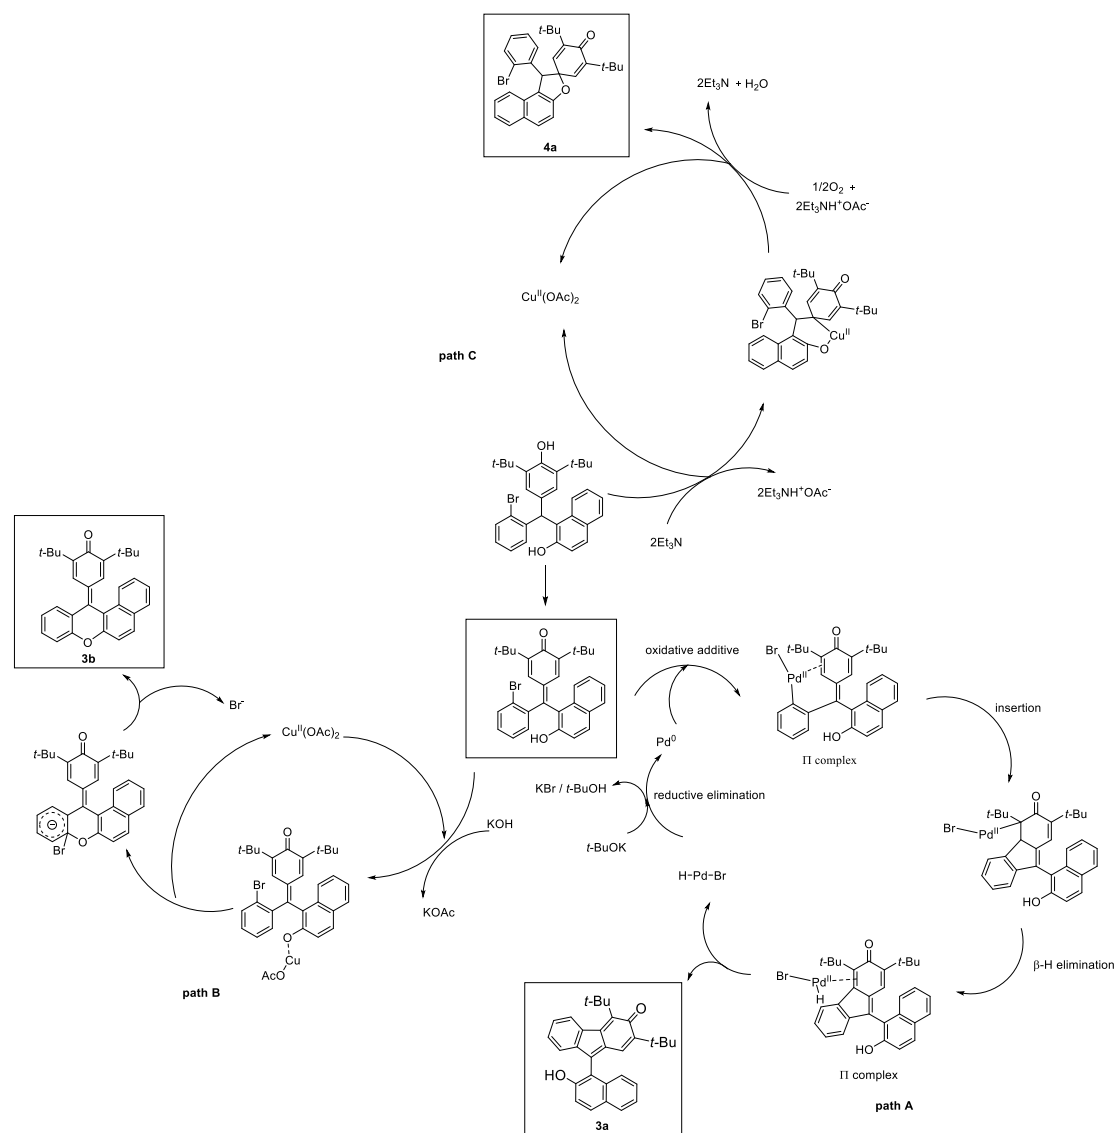

## 9. Characterization Data of 1, 2, 2a', 3, 4, 5 and 6

### 1-((3,5-di-tert-butyl-4-hydroxyphenyl)(2-bromophenyl)methyl)naphthalen-2-ol (1a).

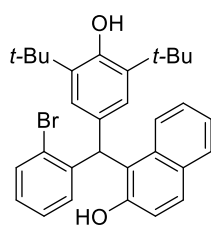

White solid; 51.10 mg, 99% yield (petroleum ether/ethyl acetate =10:1) ; mp 182.5-183.5 °C. <sup>1</sup>H NMR (CDCl<sub>3</sub>, 600 MHz) δ 7.81 (d, *J* = 8.64 Hz, 1H), 7.64 (m, 2H), 7.56 (d, *J* = 8.94 Hz, 1H), 7.22 (m, 1H), 7.07-6.97 (m, 5H), 6.81 (s, 2H), 6.46 (s, 1H), 5.42 (s, 1H), 5.15 (s, 1H), 1.23 (s, 18H); <sup>13</sup>C NMR (CDCl<sub>3</sub>, 150 MHz) δ 152.6, 152.3, 139.9, 136.8, 136.1, 132.5, 132.1, 129.7, 128.7, 128.5, 127.6, 127.5, 127.2, 127.0, 125.9, 124.3, 124.2, 122.1, 121.9, 118.9, 118.5, 47.7, 33.4, 29.2. HRMS (ESI-TOF) *m/z*: [M+H]<sup>+</sup> Calcd for C<sub>31</sub>H<sub>34</sub>BrO<sub>2</sub> 517.1742; Found 517.1748.

**7-bromo-1-((2-bromophenyl)(3,5-di-tert-butyl-4-hydroxyphenyl)methyl)naphthalen-2-ol (1b).**

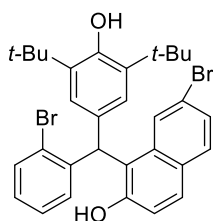

White solid; 54.92 mg, 92% yield (petroleum ether/ethyl acetate =30:1); mp 178.0-180.0 °C. <sup>1</sup>H NMR (CDCl<sub>3</sub>, 600 MHz) δ 8.01 (s, 1H), 7.58 (d, *J* = 1.74 Hz, 2H), 7.53 (m, 1H), 7.32 (m, 1H), 7.05-6.97 (m, 4H), 6.81 (s, 2H), 6.35 (s, 1H), 5.47 (s, 1H), 5.15 (s, 1H), 1.24 (s, 18H); <sup>13</sup>C NMR (CDCl<sub>3</sub>, 150 MHz) δ 153.3, 152.4, 139.5, 136.1, 133.9, 132.4, 129.6, 129.1, 128.5, 127.8, 127.0, 126.9, 125.5, 124.5, 124.2, 120.5, 119.3, 118.1, 47.7, 33.4, 29.1. HRMS (ESI-TOF) *m/z*: [M+H]<sup>+</sup> Calcd for C<sub>31</sub>H<sub>33</sub>Br<sub>2</sub>O<sub>2</sub> 597.0827; Found 597.0822.

**6-bromo-1-((2-bromophenyl)(3,5-di-tert-butyl-4-hydroxyphenyl)methyl)naphthalen-2-ol (1c).**

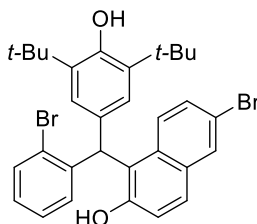

White solid; 55.44 mg, 93% yield (petroleum ether/ethyl acetate =30:1); mp 170.0-172.0 °C. <sup>1</sup>H NMR (CDCl<sub>3</sub>, 600 MHz) δ 7.82 (s, 1H), 7.57 (m, 1H), 7.54 (m, 2H), 7.40 (m, 1H), 7.17-6.99 (m, 4H), 6.80 (s, 2H), 6.38 (s, 1H), 5.42 (s, 1H), 5.15 (s, 1H), 1.24 (s, 18H); <sup>13</sup>C NMR (CDCl<sub>3</sub>, 150 MHz) δ 152.8, 152.4, 139.7, 136.2, 132.3, 131.1, 129.6, 129.4, 129.1, 128.6, 127.7, 127.0, 124.2, 124.2, 123.8, 120.1, 118.7, 115.9, 47.8, 33.4, 29.1. HRMS (ESI-TOF) *m/z*: [M+H]<sup>+</sup> Calcd for C<sub>31</sub>H<sub>33</sub>Br<sub>2</sub>O<sub>2</sub> 597.0827; Found 597.0822.

**3-bromo-1-((2-bromophenyl)(3,5-di-tert-butyl-4-hydroxyphenyl)methyl)naphthalen-2-ol (1d).**

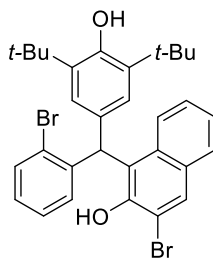

White solid; 53.65 mg, 90% yield (petroleum ether/ethyl acetate =30:1); mp 146.3-147.5 °C. <sup>1</sup>H NMR (CDCl<sub>3</sub>, 600 MHz) δ 7.98 (s, 1H), 7.80 (m, 1H), 7.53 (m, 2H), 7.25 (m, 2H), 7.11-7.02 (m, 3H), 6.82 (s, 2H), 6.47 (s, 1H), 5.88 (s, 1H), 5.12 (s, 1H), 1.24 (s, 18H); <sup>13</sup>C NMR (CDCl<sub>3</sub>, 150 MHz) δ 152.2, 148.2, 140.2, 135.8, 132.1, 131.8, 131.0, 130.0, 128.9, 128.7, 127.5, 126.7, 126.1, 124.5, 124.2, 123.1, 122.4, 120.7, 112.7, 48.4, 33.4, 29.2. HRMS (ESI-TOF) *m/z*: [M+H]<sup>+</sup> Calcd for C<sub>31</sub>H<sub>33</sub>Br<sub>2</sub>O<sub>2</sub>

597.0827; Found 597.0820.

**1-((2-bromophenyl)(3,5-di-tert-butyl-4-hydroxyphenyl)methyl)-7-methoxynaphthalen-2-ol (1e).**

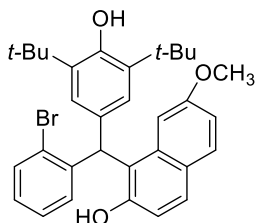

White solid; 49.16 mg, 90% yield (petroleum ether/ethyl acetate =30:1); mp 168.0-170.0 °C. <sup>1</sup>H NMR (CDCl<sub>3</sub>, 600 MHz) δ 7.57 (m, 3H), 7.55 (m, 3H), 7.02 (m, 1H), 6.88 (m, 1H), 6.82 (m, 3H), 6.39 (s, 1H), 5.37 (s, 1H), 5.14 (s, 1H), 3.75 (s, 3H), 1.24 (s, 18H); <sup>13</sup>C NMR (CDCl<sub>3</sub>, 150 MHz) δ 157.5, 153.1, 152.3, 140.0, 136.1, 133.9, 131.9, 129.9, 128.9, 128.3, 127.5, 127.1, 124.3, 124.2, 123.7, 117.8, 116.3, 114.4, 101.2, 54.3, 48.0, 33.4, 29.2. HRMS (ESI-TOF) m/z: [M+H]<sup>+</sup> Calcd for C<sub>32</sub>H<sub>36</sub>BrO<sub>3</sub> 547.1848; Found 547.1839.

**1-((2-bromo-6-chlorophenyl)(3,5-di-tert-butyl-4-hydroxyphenyl)methyl)naphthalen-2-ol (1f).**

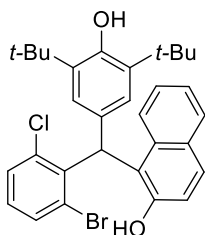

White solid; 52.90 mg, 96% yield (petroleum ether/ethyl acetate =30:1); mp 181.3-182.7 °C. <sup>1</sup>H NMR (CDCl<sub>3</sub>, 600 MHz) δ 7.65 (d, *J* = 7.56 Hz, 1H), 7.60 (d, *J* = 8.88 Hz, 1H), 7.49 (d, *J* = 8.52 Hz, 2H), 7.19 (m, 2H), 7.13 (m, 2H), 6.96 (m, 2H), 6.84 (s, 1H), 6.70 (s, 1H), 5.47 (s, 1H), 5.21 (s, 1H), 1.30 (d, *J* = 16.56 Hz, 18H); <sup>13</sup>C NMR (CDCl<sub>3</sub>, 150 MHz) δ 153.9, 152.7, 139.3, 135.3, 132.6, 128.7, 128.4, 127.7, 126.5, 125.6, 122.0, 121.6, 119.3, 115.5, 33.6, 33.5, 29.8, 29.3, 29.2. HRMS (ESI-TOF) m/z: [M+H]<sup>+</sup> Calcd for C<sub>31</sub>H<sub>33</sub>BrClO<sub>2</sub> 551.1352; Found 551.1351.

**1-((2-bromo-5-fluorophenyl)(3,5-di-tert-butyl-4-hydroxyphenyl)methyl)naphthalen-2-ol (1g).**

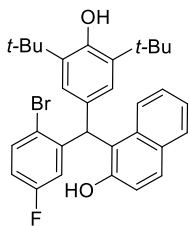

White solid; 48.16 mg, 90% yield (petroleum ether/ethyl acetate =30:1); mp 136.2-137.5 °C. <sup>1</sup>H NMR (CDCl<sub>3</sub>, 600 MHz) δ 7.66 (m, 1H), 7.37 (m, 3H), 7.36 (m, 1H), 7.24 (m, 1H), 6.98 (m, 1H), 6.78-6.76 (m, 4H), 6.41 (s, 1H), 5.34 (s, 1H), 5.16 (s, 1H), 1.25 (s, 18H); <sup>13</sup>C NMR (CDCl<sub>3</sub>, 150 MHz) δ 162.2, 160.5, 152.6, 152.4, 142.4, 142.4, 136.2, 132.4, 129.0, 128.6, 128.3, 127.7, 126.0, 124.1, 122.3, 121.6, 119.1, 118.3, 118.3,

117.9, 117.0, 116.9, 114.9, 114.7, 47.8, 33.4, 29.1.  $^{19}\text{F}$  NMR ( $\text{CDCl}_3$ , 377 MHz)  $\delta$  -113.3. HRMS (ESI-TOF)  $m/z$ :  $[\text{M}+\text{H}]^+$  Calcd for  $\text{C}_{31}\text{H}_{33}\text{BrFO}_2$  535.1648; Found 535.1636.

***1-((2-bromo-5-methoxyphenyl)(3,5-di-tert-butyl-4-hydroxyphenyl)methyl)naphthalen-2-ol (1h).***

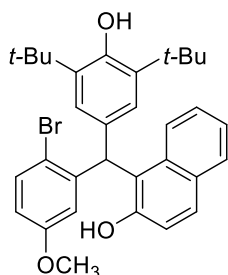

White solid; 49.31 mg, 93% yield (petroleum ether/ethyl acetate =30:1) ; mp 114.0-116.0 °C.  $^1\text{H}$  NMR ( $\text{CDCl}_3$ , 600 MHz)  $\delta$  7.82 (d,  $J = 8.64$ , 1H), 7.69 (d,  $J = 8.04$ , 1H), 7.64 (d,  $J = 8.88$ , 1H), 7.36 (m, 2H), 7.23 (m, 1H), 6.98 (m, 1H), 6.84 (s, 2H), 6.59 (m, 2H), 6.39 (s, 1H), 5.39 (s, 1H), 5.13 (s, 1H), 3.52 (s, 3H), 1.25 (s, 18H);  $^{13}\text{C}$  NMR ( $\text{CDCl}_3$ , 150 MHz)  $\delta$  158.3, 152.6, 152.3, 141.1, 136.0, 132.6, 132.6, 128.8, 128.7, 128.5, 127.6, 125.9, 124.2, 122.1, 121.9, 119.0, 118.4, 115.7, 114.7, 113.0, 54.2, 47.8, 33.4, 29.2. HRMS (ESI-TOF)  $m/z$ :  $[\text{M}+\text{H}]^+$  Calcd for  $\text{C}_{32}\text{H}_{36}\text{BrO}_3$  547.1848; Found 547.1839.

***1-((2-bromo-4-methylphenyl)(3,5-di-tert-butyl-4-hydroxyphenyl)methyl)naphthalen-2-ol (1i).***

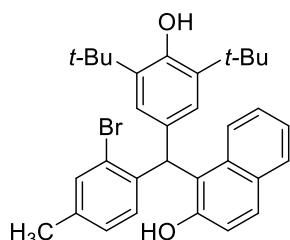

White solid; 47.81 mg, 90% yield (petroleum ether/ethyl acetate =30:1) ; mp 124.6-125.2 °C.  $^1\text{H}$  NMR ( $\text{CDCl}_3$ , 600 MHz)  $\delta$  7.82 (d,  $J = 8.64$  Hz, 1H), 7.69-7.62 (m, 2H), 7.39 (m, 2H), 7.16 (m, 1H), 6.97-6.90 (m, 3H), 6.84 (s, 2H), 6.40 (s, 1H), 5.40 (s, 1H), 5.12 (s, 1H), 2.21 (s, 3H), 1.24 (s, 18H);  $^{13}\text{C}$  NMR ( $\text{CDCl}_3$ , 150 MHz)  $\delta$  158.3, 152.6, 152.3, 141.1, 137.5, 136.8, 136.0, 132.6, 132.5, 129.4, 129.3, 128.6, 128.5, 127.8, 127.6, 125.9, 124.3, 124.0, 122.1, 121.9, 118.9, 118.7, 118.4, 115.7, 114.7, 113.0, 54.2, 47.8, 33.4, 29.2. HRMS (ESI-TOF)  $m/z$ :  $[\text{M}+\text{H}]^+$  Calcd for  $\text{C}_{32}\text{H}_{36}\text{BrO}_2$  531.1899; Found 531.1887.

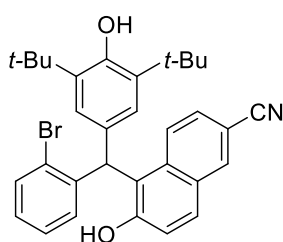

***5-((2-bromophenyl)(3,5-di-tert-butyl-4-hydroxyphenyl)methyl)-6-hydroxy-2-naphthonitrile (1j).***

White solid; 53.03 mg, 98% yield (petroleum ether/ethyl acetate =30:1) ; mp 161.1-162.5 °C.  $^1\text{H}$  NMR ( $\text{CDCl}_3$ , 600 MHz)  $\delta$  8.06

(m, 1H), 7.85 (m, 1H), 7.70 (m, 1H), 7.49 (m, 2H), 7.12-7.06 (m, 3H), 6.98 (m, 1H), 6.80 (s, 2H), 6.40 (s, 1H), 5.69 (s, 1H), 5.18 (s, 1H), 1.25 (s, 18H); <sup>13</sup>C NMR (CDCl<sub>3</sub>, 150 MHz) δ 155.2, 152.6, 139.4, 136.4, 134.4, 1335.5, 132.4, 129.4, 129.2, 128.1, 127.9, 127.5, 127.1, 126.7, 124.2, 124.2, 123.1, 120.8, 118.9, 118.4, 105.5, 47.8, 33.4, 29.1. HRMS (ESI-TOF) m/z: [M+H]<sup>+</sup> Calcd for C<sub>32</sub>H<sub>33</sub>BrNO<sub>2</sub> 542.1616; Found 542.1615.

**1-((1-bromonaphthalen-2-yl)(3,5-di-tert-butyl-4-hydroxyphenyl)methyl)naphthalen-2-ol (1k).**

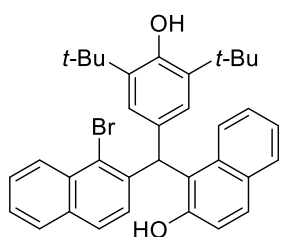

White solid; 53.88 mg, 95% yield (petroleum ether/ethyl acetate =30:1) ; mp 138.6-139.2 °C. <sup>1</sup>H NMR (CDCl<sub>3</sub>, 600 MHz) δ 8.33 (d, *J* = 8.58 Hz, 1H), 7.86 (d, *J* = 8.64 Hz, 1H), 7.69 (m, 3H), 7.41 (m, 2H), 7.29 (m, 1H), 7.16 (m, 3H), 7.00 (d, *J* = 8.88 Hz, 1H), 6.88 (s, 2H), 6.78 (s, 1H), 5.49 (s, 1H), 5.13 (s, 1H), 1.21 (s, 18H); <sup>13</sup>C NMR (CDCl<sub>3</sub>, 150 MHz) δ 152.6, 152.3, 138.2, 136.2, 132.7, 132.7, 131.6, 129.0, 128.8, 128.5, 127.6, 127.1, 126.4, 126.0, 125.3, 124.3, 123.9, 122.2, 122.0, 119.0, 118.7, 49.0, 33.4, 29.2. HRMS (ESI-TOF) m/z: [M+H]<sup>+</sup> Calcd for C<sub>35</sub>H<sub>36</sub>BrO<sub>2</sub> 567.1899; Found 567.1896.

**6-((2-bromophenyl)(3,5-di-tert-butyl-4-hydroxyphenyl)methyl)benzo[d][1,3]dioxol-5-ol (1l).**

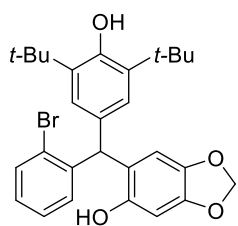

White solid; 46.00 mg, 90% yield (petroleum ether/ethyl acetate =30:1) ; mp 160.0-162.0 °C. <sup>1</sup>H NMR (CDCl<sub>3</sub>, 600 MHz) δ 7.50 (m, 1H), 7.13 (m, 1H), 7.02 (m, 1H), 6.89 (m, 1H), 6.81 (s, 2H), 6.35 (s, 1H), 6.12 (s, 1H), 5.79 (m, 2H), 5.72 (s, 1H), 5.05 (s, 1H), 4.37 (s, 1H), 1.28 (s, 18H); <sup>13</sup>C NMR (CDCl<sub>3</sub>, 150 MHz) δ 151.7, 147.3, 145.6, 141.6, 140.4, 135.1, 132.1, 129.8, 129.8, 127.1, 126.3, 124.9, 124.4, 120.9, 108.3, 100.0, 97.9, 49.4, 33.3, 29.3. HRMS (ESI-TOF) m/z: [M+H]<sup>+</sup> Calcd for C<sub>28</sub>H<sub>32</sub>BrO<sub>4</sub> 511.1484; Found 511.1479.

**1-((2-chlorophenyl)(3,5-di-tert-butyl-4-hydroxyphenyl)methyl)naphthalen-2-ol (1m).**

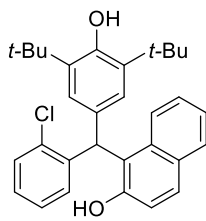

White solid; 43.06 mg, 91% yield (petroleum ether/ethyl acetate =30:1); mp 116.0-118.0 °C. <sup>1</sup>H NMR (CDCl<sub>3</sub>, 600 MHz) δ 7.83 (m, 1H), 7.82-7.68 (m, 2H), 7.64 (m, 2H), 7.25 (m, 1H), 7.10 (m, 3H), 6.99 (m, 1H), 6.83 (s, 2H), 6.52 (s, 1H), 5.39 (s, 1H), 5.13 (s, 1H), 1.24 (s, 18H); <sup>13</sup>C NMR (CDCl<sub>3</sub>, 150 MHz) δ 152.6, 152.3, 138.3, 136.1, 133.3, 132.5, 129.6, 129.1, 128.7, 128.5, 127.6, 127.3, 126.3, 125.9, 124.1, 122.1, 121.7, 119.0, 118.4, 45.0, 33.4, 29.2. HRMS (ESI-TOF) m/z: [M+H]<sup>+</sup> Calcd for C<sub>31</sub>H<sub>34</sub>ClO<sub>2</sub> 473.2247; Found 473.2236.

**1-((3,5-di-tert-butyl-4-hydroxyphenyl)(2,6-dibromophenyl)methyl)naphthalen-2-ol (In).**

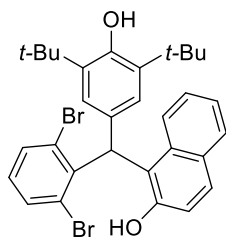

White solid; 55.34 mg, 93% yield (petroleum ether/ethyl acetate =30:1); mp 227.8-228.3 °C. <sup>1</sup>H NMR (CDCl<sub>3</sub>, 600 MHz) δ 7.64-7.60 (m, 2H), 7.51-7.50 (m, 2H), 7.42 (d, *J* = 8.64, 1H), 7.23-7.09 (m, 4H), 6.88-6.82 (m, 2H), 6.69 (s, 1H), 5.48 (s, 1H), 5.22 (s, 1H), 1.31 (s, 18H); <sup>13</sup>C NMR (CDCl<sub>3</sub>, 150 MHz) δ 154.1, 152.7, 140.5, 132.5, 128.8, 128.4, 128.0, 127.7, 126.4, 125.6, 122.1, 121.6, 119.3, 115.4, 51.5, 33.5, 29.2. HRMS (ESI-TOF) m/z: [M+H]<sup>+</sup> Calcd for C<sub>31</sub>H<sub>33</sub>Br<sub>2</sub>O<sub>2</sub> 595.0847; Found 595.0835.

**1-((3,5-di-tert-butyl-4-hydroxyphenyl)(2-methoxyphenyl)methyl)naphthalen-2-ol (Io).**

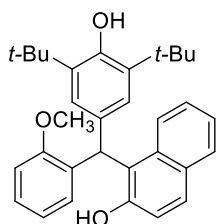

White solid; 45.05 mg, 96% yield (petroleum ether/ethyl acetate =30:1); mp 134.2-135.7 °C. <sup>1</sup>H NMR (CDCl<sub>3</sub>, 600 MHz) δ 7.92 (d, *J* = 8.64 Hz, 1H), 7.59 (m, 2H), 7.20 (m, 1H), 7.13 (m, 4H), 6.77 (m, 4H), 6.52 (s, 1H), 5.51 (s, 1H), 5.06 (s, 1H), 3.69 (s, 3H), 1.23 (s, 18H); <sup>13</sup>C NMR (CDCl<sub>3</sub>, 150 MHz) δ 156.0, 152.4, 151.9, 135.6, 132.7, 130.3, 129.2, 128.9, 128.5, 128.0, 127.5, 127.2, 125.4, 124.1, 122.1, 121.8, 120.1, 119.4, 118.9, 109.8, 54.7, 41.0, 33.4, 29.2. HRMS (ESI-TOF) m/z: [M+H]<sup>+</sup> Calcd for C<sub>32</sub>H<sub>37</sub>O<sub>3</sub> 469.2743; Found 469.2744.

**1-((4-(tert-butyl)phenyl)(3,5-di-tert-butyl-4-hydroxyphenyl)methyl)naphthalen-2-ol (Ip).**



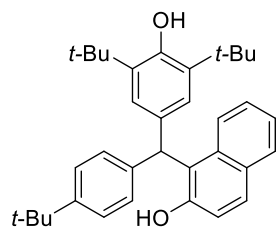

White solid; 45.00 mg, 91% yield (petroleum ether/ethyl acetate =30:1) ; mp 168.2-169.7 °C. <sup>1</sup>H NMR (CDCl<sub>3</sub>, 600 MHz) δ 7.98 (d, *J* = 8.64 Hz, 1H), 7.69 (m, 1H), 7.63 (m, 1H), 7.35 (m, 1H), 7.26-7.22 (m, 3H), 7.08 (m, 3H), 6.94 (s, 2H), 6.18 (s, 1H), 5.31 (s, 1H), 5.09 (s, 1H), 1.25 (s, 18H), 1.21 (s, 9H); <sup>13</sup>C NMR (CDCl<sub>3</sub>, 150 MHz) δ 152.0, 151.9, 148.8, 138.0, 135.5, 132.5, 130.8, 128.5, 128.3, 127.6, 127.5, 125.6, 124.8, 124.6, 122.0, 121.9, 119.5, 118.9, 47.0, 33.4, 30.3, 29.2. HRMS (ESI-TOF) *m/z*: [M+H]<sup>+</sup> Calcd for C<sub>35</sub>H<sub>43</sub>O<sub>2</sub> 495.3263; Found 495.3260.

**1-((4-(benzyloxy)phenyl)(3,5-di-tert-butyl-4-hydroxyphenyl)methyl)naphthalen-2-ol (1q).**

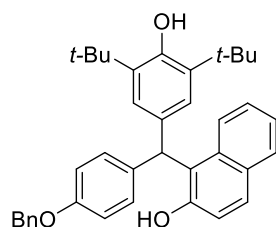

White solid; 51.16 mg, 94% yield (petroleum ether/ethyl acetate =30:1) ; mp 116.3-117.6 °C. <sup>1</sup>H NMR (CDCl<sub>3</sub>, 600 MHz) δ 7.94 (d, *J* = 8.64 Hz, 1H), 7.62 (m, 2H), 7.33-7.23 (m, 7H), 7.09 (m, 2H), 6.98 (m, 3H), 6.85-6.83 (m, 2H), 6.15 (s, 1H), 5.35 (s, 1H), 5.11 (s, 1H), 4.95 (s, 2H), 1.25 (s, 18H); <sup>13</sup>C NMR (CDCl<sub>3</sub>, 150 MHz) δ 156.7, 152.1, 152.0, 136.1, 135.8, 133.4, 132.5, 131.1, 129.0, 128.6, 128.3, 127.5, 126.9, 126.4, 125.6, 124.6, 122.0, 121.9, 119.5, 118.9, 114.3, 69.1, 46.8, 33.4, 29.2. HRMS (ESI-TOF) *m/z*: [M+H]<sup>+</sup> Calcd for C<sub>38</sub>H<sub>41</sub>O<sub>3</sub> 545.3056; Found 545.3044.

**1-((3,5-di-tert-butyl-4-hydroxyphenyl)(naphthalen-1-yl)methyl)naphthalen-2-ol (1r).**

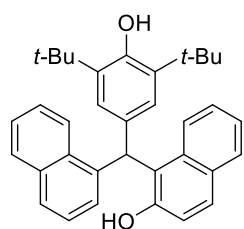

White solid; 44.03 mg, 90% yield (petroleum ether/ethyl acetate =30:1) ; mp 178.0-179.0 °C. <sup>1</sup>H NMR (CDCl<sub>3</sub>, 600 MHz) δ 7.86 (m, 1H), 7.80 (d, *J* = 8.70 Hz, 2H), 7.71 (t, *J* = 6.96 Hz, 2H), 7.64 (d, *J* = 8.88 Hz, 1H), 7.38-7.28 (m, 5H), 7.22 (m, 1H), 7.06-6.80 (m, 4H), 5.51 (s, 1H), 5.09 (s, 1H), 1.20 (s, 18H); <sup>13</sup>C NMR (CDCl<sub>3</sub>, 150 MHz) δ 153.0, 152.0, 137.3, 135.7, 133.1, 132.3, 130.8, 130.4, 128.6, 128.4, 127.9, 127.7, 127.1, 125.8, 125.4, 124.8, 124.7, 123.0, 122.0, 121.7, 118.8, 118.8, 44.9, 33.3, 29.2. HRMS (ESI-TOF) *m/z*: [M+H]<sup>+</sup> Calcd for C<sub>35</sub>H<sub>37</sub>O<sub>2</sub> 489.2794; Found 489.2784.

**1-((2-bromophenyl)(4-hydroxy-3,5-diisopropylphenyl)methyl)naphthalen-2-ol (1s).**

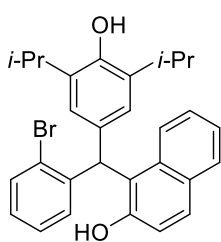

White solid; 46.36 mg, 95% yield (petroleum ether/ethyl acetate =10:1); mp 116.9-117.3 °C. <sup>1</sup>H NMR (CDCl<sub>3</sub>, 600 MHz) δ 7.79 (m, 1H), 7.70-7.64 (m, 2H), 7.57 (d, *J* = 7.98 Hz, 1H), 7.23 (m, 2H), 7.07 (m, 3H), 6.97 (m, 1H), 6.69 (s, 2H), 6.48 (s, 1H), 5.44 (s, 1H), 4.75 (s, 1H), 2.96-3.03 (m, 2H), 1.02-1.06 (m, 12H); <sup>13</sup>C NMR (CDCl<sub>3</sub>, 150 MHz) δ 152.7, 148.5, 139.7, 134.0, 132.5, 132.2, 130.6, 129.7, 128.7, 128.5, 127.6, 127.0, 126.0, 124.3, 122.8, 121.8, 119.0, 118.4, 47.7, 26.3, 21.5. HRMS (ESI-TOF) *m/z*: [M+H]<sup>+</sup> Calcd for C<sub>29</sub>H<sub>30</sub>BrO<sub>2</sub> 489.1429; Found 489.1426.

**2,4-di-tert-butyl-9-(2-hydroxynaphthalen-1-yl)-3H-fluoren-3-one (2a).**

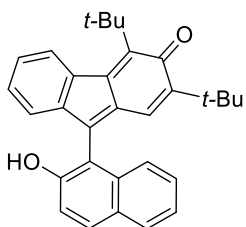

Red solid; 41.25 mg, 95% yield (petroleum ether/ethyl acetate =10:1); mp 96.3-97.5 °C. <sup>1</sup>H NMR (CDCl<sub>3</sub>, 600 MHz) δ 7.81-7.78 (m, 2H) 7.76 (m, 1H), 7.64 (d, *J* = 7.74 Hz, 1H), 7.52 (m, 2H), 7.21 (m, 1H), 7.05 (m, 1H), 6.90 (m, 1H), 6.57 (d, *J* = 7.32 Hz, 1H), 6.37 (s, 1H), 5.20 (s, 1H), 1.52 (s, 9H), 1.08 (s, 9H); <sup>13</sup>C NMR (CDCl<sub>3</sub>, 150 MHz) δ 193.8, 164.0, 154.0, 150.1, 147.2, 143.7, 140.8, 139.1, 136.4, 135.0, 131.8, 130.1, 127.8, 127.7, 127.2, 125.8, 124.1, 122.8, 122.2, 116.7, 110.3, 34.8, 34.0, 29.7, 28.5. HRMS (ESI-TOF) *m/z*: [M+H]<sup>+</sup> Calcd for C<sub>31</sub>H<sub>31</sub>O<sub>2</sub> 435.2324; Found 435.2334.

**9-(7-bromo-2-hydroxynaphthalen-1-yl)-2,4-di-tert-butyl-3H-fluoren-3-one (2b).**

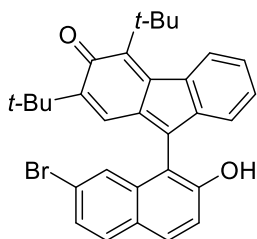

Red solid; 47.12 mg, 92% yield (petroleum ether/ethyl acetate =10:1); mp 106.6-107.6 °C. <sup>1</sup>H NMR (CDCl<sub>3</sub>, 600 MHz) δ 7.76 (d, *J* = 8.94 Hz, 1H), 7.66-7.63 (m, 4H), 7.22 (m, 1H), 7.07 (m, 1H), 6.93 (m, 1H), 6.57 (d, *J* = 7.44 Hz, 1H), 6.32 (s, 1H), 5.27 (s, 1H), 1.53 (s, 9H), 1.09 (s, 9H); <sup>13</sup>C NMR (CDCl<sub>3</sub>, 150 MHz) δ 193.7, 154.3, 151.0, 147.5, 143.2, 140.7, 137.9, 136.4, 135.3, 133.0, 130.0, 128.9, 127.8, 126.6, 126.3, 126.2, 123.9, 121.9, 120.4, 117.2, 109.7, 34.9, 34.0, 29.7, 28.5. HRMS (ESI-TOF) *m/z*: [M+H]<sup>+</sup> Calcd for C<sub>31</sub>H<sub>30</sub>BrO<sub>2</sub> 513.1429; Found 513.1421.

**2,4-di-tert-butyl-9-(2-hydroxy-7-methoxynaphthalen-1-yl)-3H-fluoren-3-one (2c).**

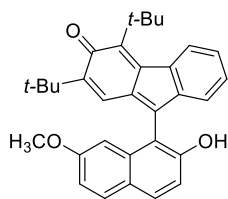

Red solid; 42.71 mg, 92% yield (petroleum ether/ethyl acetate =10:1); mp 178.3-179.3 °C. <sup>1</sup>H NMR (CDCl<sub>3</sub>, 600 MHz) δ 7.71 (d, *J* = 8.82 Hz, 1H), 7.67-7.63 (m, 2H), 7.05-6.93 (m, 4H), 6.80 (s, 1H), 6.65 (m, 1H), 6.41 (s, 1H), 5.19 (s, 1H), 3.63 (s, 3H), 1.52 (s, 9H), 1.09 (s, 9H); <sup>13</sup>C NMR (CDCl<sub>3</sub>, 150 MHz) δ 193.9, 157.4, 153.8, 150.8, 147.1, 143.2, 140.9, 139.4, 136.5, 134.8, 133.1, 129.8, 128.8, 127.6, 126.4, 124.4, 123.4, 122.3, 114.8, 114.2, 109.5, 103.7, 54.3, 34.9, 33.9, 29.7, 28.5. HRMS (ESI-TOF) *m/z*: [M+H]<sup>+</sup> Calcd for C<sub>32</sub>H<sub>33</sub>O<sub>3</sub> 465.2430; Found 465.2433.

**5-(2,4-di-tert-butyl-3-oxo-3H-fluoren-9-yl)-6-hydroxy-2-naphthonitrile (2d).**

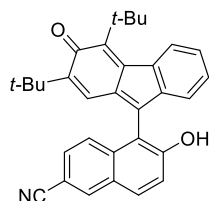

Red solid; 42.24 mg, 92% yield (petroleum ether/ethyl acetate =10:1); mp 121.2-122.2 °C. <sup>1</sup>H NMR (CDCl<sub>3</sub>, 600 MHz) δ 8.15 (s, 1H), 7.86 (m, 1H), 7.58 (m, 2H), 7.43 (m, 1H), 7.34 (m, 1H), 7.08 (m, 1H), 6.92 (m, 1H), 6.51 (d, *J* = 7.38 Hz, 1H), 6.27 (s, 1H), 5.63 (s, 1H), 1.51 (s, 9H), 1.08 (s, 9H); <sup>13</sup>C NMR (CDCl<sub>3</sub>, 150 MHz) δ 193.7, 154.7, 152.8, 147.8, 143.2, 140.6, 137.2, 135.5, 133.6, 133.3, 130.5, 127.8, 127.0, 126.7, 126.4, 125.4, 123.5, 121.8, 118.7, 118.2, 110.9, 106.2, 34.9, 34.0, 29.6, 28.5. HRMS (ESI-TOF) *m/z*: [M+H]<sup>+</sup> Calcd for C<sub>32</sub>H<sub>30</sub>NO<sub>2</sub> 460.2277; Found 460.2283.

**9-(6-bromo-2-hydroxynaphthalen-1-yl)-2,4-di-tert-butyl-3H-fluoren-3-one (2e).**

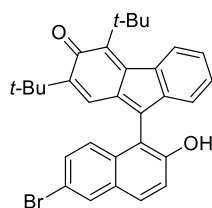

Red solid; 45.58 mg, 89% yield (petroleum ether/ethyl acetate =10:1); mp 177.8-178.8 °C. <sup>1</sup>H NMR (CDCl<sub>3</sub>, 600 MHz) δ 7.92 (s, 1H), 7.64 (m, 2H), 7.38 (m, 2H), 7.08 (m, 1H), 6.94 (m, 1H), 6.91 (m, 1H), 6.54 (d, *J* = 7.32 Hz, 1H), 6.32 (s, 1H), 5.25 (s, 1H), 1.52 (s, 9H), 1.08 (s, 9H); <sup>13</sup>C NMR (CDCl<sub>3</sub>, 150 MHz) δ 193.7, 154.3, 150.4, 147.6, 143.4, 140.7, 138.2, 136.3, 135.2, 130.3, 129.0, 127.7, 126.6, 126.0, 123.8, 122.0, 117.9, 116.6, 110.6, 34.9, 34.0, 29.7, 28.5. HRMS (ESI-TOF) *m/z*: [M+H]<sup>+</sup> Calcd for C<sub>31</sub>H<sub>30</sub>BrO<sub>2</sub> 513.1429; Found 513.1432.

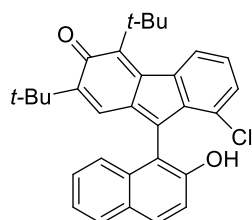

**2,4-di-tert-butyl-8-chloro-9-(2-hydroxynaphthalen-1-yl)-3H-fluoren-3-one (2f).**

Red solid; 40.26 mg, 86% yield (petroleum ether/ethyl acetate =10:1); mp 209.4-210.4 °C. <sup>1</sup>H NMR (CDCl<sub>3</sub>, 600 MHz) δ 7.80-7.75 (m, 2H), 7.45 (m, 2H), 7.31 (m, 2H), 7.16 (s, 1H), 6.99 (m, 1H), 6.88 (d, *J* = 8.04 Hz, 1H), 6.24 (s, 1H), 5.06 (s, 1H), 1.51 (s, 9H), 1.04 (s, 9H); <sup>13</sup>C NMR (CDCl<sub>3</sub>, 150 MHz) δ 193.8, 155.2, 149.6, 147.6, 139.6, 139.5, 138.8, 137.7, 137.1, 132.6, 129.8, 129.8, 128.8, 127.0, 126.2, 126.0, 123.9, 123.5, 122.7, 116.4, 112.0, 35.0, 33.9, 29.7, 28.4. HRMS (ESI-TOF) *m/z*: [M+H]<sup>+</sup> Calcd for C<sub>31</sub>H<sub>30</sub>ClO<sub>2</sub> 469.1934; Found 469.1944.

**2,4-di-tert-butyl-9-(2-hydroxynaphthalen-1-yl)-7-methyl-3H-fluoren-3-one (2g).**

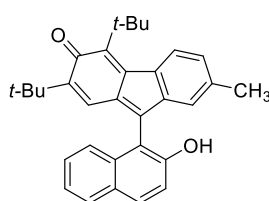

Red solid; 40.34 mg, 90% yield (petroleum ether/ethyl acetate =10:1); mp 187.0-188.0 °C. <sup>1</sup>H NMR (CDCl<sub>3</sub>, 600 MHz) δ 7.81-7.76 (m, 2H), 7.51 (m, 1H), 7.51 (s, 1H), 7.29 (m, 2H), 7.21 (m, 1H), 6.72 (d, *J* = 7.56 Hz, 1H), 6.46 (d, *J* = 7.56 Hz, 1H), 6.35 (s, 1H), 5.20 (s, 1H), 2.29 (s, 3H), 1.52 (s, 9H), 1.08 (s, 9H); <sup>13</sup>C NMR (CDCl<sub>3</sub>, 150 MHz) δ 193.7, 153.7, 150.0, 146.8, 141.0, 141.0, 139.4, 136.9, 136.6, 134.4, 131.8, 130.0, 129.1, 127.2, 125.7, 124.3, 122.8, 122.0, 116.7, 110.4, 34.8, 33.9, 29.7, 28.5, 20.9. HRMS (ESI-TOF) *m/z*: [M+H]<sup>+</sup> Calcd for C<sub>32</sub>H<sub>33</sub>O<sub>2</sub> 449.2481; Found 449.2491.

**2,4-di-tert-butyl-9-(2-hydroxynaphthalen-1-yl)-7-methoxy-3H-fluoren-3-one (2h).**

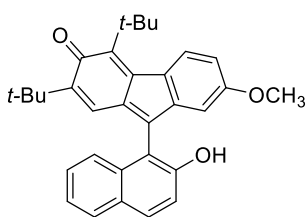

Red solid; 41.78 mg, 90% yield (petroleum ether/ethyl acetate =10:1); mp 201.9-202.9 °C. <sup>1</sup>H NMR (CDCl<sub>3</sub>, 600 MHz) δ 7.81-7.76 (m, 2H), 7.51 (m, 2H), 7.31-7.28 (m, 2H), 7.21 (m, 1H), 6.54 (d, *J* = 8.46 Hz, 1H), 6.31 (s, 1H), 6.13 (s, 1H), 5.21 (s, 1H), 3.56 (s, 3H), 1.50 (s, 9H), 1.07 (s, 9H); <sup>13</sup>C NMR (CDCl<sub>3</sub>, 150 MHz) δ 193.7, 159.4, 151.7, 150.1, 147.4, 145.7, 140.6, 138.4, 136.3, 131.8, 130.0, 128.5, 127.2, 125.8, 124.0, 122.8, 116.7, 110.2, 110.1, 109.1, 54.4, 34.6, 33.9, 29.6, 28.5. HRMS (ESI-TOF) *m/z*: [M+H]<sup>+</sup> Calcd for C<sub>32</sub>H<sub>33</sub>O<sub>3</sub> 465.2430; Found 465.2440.

**2,4-di-tert-butyl-7-fluoro-9-(2-hydroxynaphthalen-1-yl)-3H-fluoren-3-one (2i).**

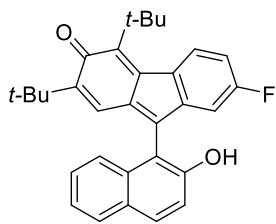

Red solid; 41.15 mg, 91% yield (petroleum ether/ethyl acetate =10:1); mp 114.7-115.7 °C. <sup>1</sup>H NMR (CDCl<sub>3</sub>, 600 MHz) δ 7.82-7.77 (m, 2H), 7.48 (m, 2H), 7.35-7.29 (m, 2H), 7.20 (m, 1H), 6.73 (m, 1H), 6.35 (s, 1H), 6.27 (d, *J* = 8.04 Hz, 1H), 5.19 (s, 1H), 1.50 (s, 9H), 1.07 (s, 9H); <sup>13</sup>C NMR (CDCl<sub>3</sub>, 150 MHz) δ 193.7, 163.1, 163.0, 161.4, 153.7, 150.1, 147.7, 146.4, 146.4, 139.8, 137.8, 137.8, 136.5, 132.0, 131.9, 131.6, 130.3, 128.6, 127.4, 126.0, 124.0, 124.0, 123.0, 116.7, 112.3, 112.2, 109.8, 109.7, 109.7, 34.8, 34.0, 29.7, 28.5. <sup>19</sup>F NMR (CDCl<sub>3</sub>, 377 MHz) δ -112.7. HRMS (ESI-TOF) *m/z*: [M+H]<sup>+</sup> Calcd for C<sub>31</sub>H<sub>30</sub>FO<sub>2</sub> 453.2230; Found 453.2220.

**8-bromo-9-(6-bromo-2-hydroxynaphthalen-1-yl)-2,4-di-tert-butyl-3H-fluoren-3-one (2j).**

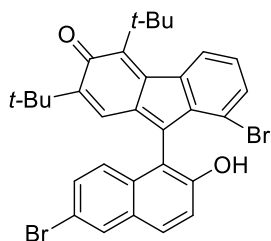

Red solid; 53.31 mg, 90% yield (petroleum ether/ethyl acetate =10:1); mp 96.5-97.5 °C. <sup>1</sup>H NMR (CDCl<sub>3</sub>, 600 MHz) δ 7.91 (s, 1H), 7.60 (m, 4H), 7.20 (s, 1H), 7.09 (d, *J* = 8.04 Hz, 1H), 6.93 (t, *J* = 7.92 Hz, 1H), 6.18 (s, 1H), 5.10 (s, 1H), 1.50 (s, 9H), 1.04 (s, 9H); <sup>13</sup>C NMR (CDCl<sub>3</sub>, 150 MHz) δ 193.8, 155.6, 150.2, 148.0, 140.8, 139.0, 137.6, 137.6, 133.2, 131.4, 129.1, 128.9, 127.2, 126.8, 125.3, 117.6, 116.9, 116.6, 112.0, 35.0, 34.0, 29.7, 28.5, 28.4. HRMS (ESI-TOF) *m/z*: [M+H]<sup>+</sup> Calcd for C<sub>31</sub>H<sub>29</sub>Br<sub>2</sub>O<sub>2</sub> 593.0514; Found 593.0519.

**9-(2-hydroxynaphthalen-1-yl)-2,4-diisopropyl-3H-fluoren-3-one (2k).**

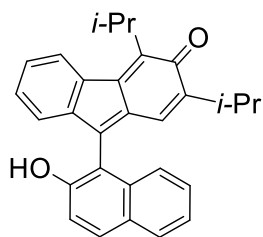

Red solid; 34.53 mg, 85% yield (petroleum ether/ethyl acetate =10:1); mp 134.2-135.3 °C. <sup>1</sup>H NMR (CDCl<sub>3</sub>, 600 MHz) δ 7.82 (m, 2H), 7.60 (m, 2H), 7.53 (m, 3H), 7.08 (m, 1H), 6.93 (m, 1H), 6.63 (d, *J* = 7.32 Hz, 1H), 6.46 (s, 1H), 5.24 (s, 1H), 3.61-3.56 (m, 1H), 2.91-2.87 (m, 1H), 1.43-1.41 (m, 6H), 0.92-0.86 (m, 6H); <sup>13</sup>C NMR (CDCl<sub>3</sub>, 150 MHz) δ 187.3, 150.0, 145.0, 143.9, 143.1, 142.3, 141.2, 136.7, 134.2, 131.7, 130.2, 128.3, 127.7, 127.3, 125.8, 124.5, 124.2, 122.9, 122.7, 116.8, 110.3, 28.7, 25.7, 21.0, 20.9, 19.8. HRMS (ESI-TOF) *m/z*: [M+H]<sup>+</sup> Calcd for C<sub>29</sub>H<sub>27</sub>O<sub>2</sub> 407.2011; Found 407.2020.

**1-(2,4-di-tert-butyl-3-oxo-3H-fluoren-9-yl)naphthalen-2-yl**

**2,4,6-trimethylbenzenesulfonate (2a').**

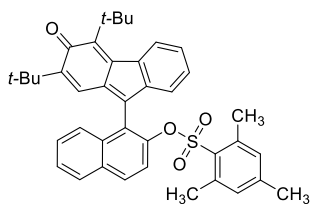

Red solid; 58.17 mg, 96% yield (petroleum ether/ethyl acetate) =30:1; mp 118.4-119.6 °C. <sup>1</sup>H NMR (CDCl<sub>3</sub>, 600 MHz) δ 7.93 (d, *J* = 9.00 Hz, 1H), 7.86 (d, *J* = 8.16 Hz, 1H), 7.69 (m, 1H), 7.46-7.43 (m, 3H), 7.34-7.32 (m, 1H), 6.95 (t, *J* = 7.62 Hz, 1H), 6.76 (t, *J* = 7.38 Hz, 1H), 6.45 (s, 2H), 6.25 (d, *J* = 7.32 Hz, 1H), 6.18 (s, 1H), 2.18 (s, 6H), 2.02 (s, 3H), 1.49 (s, 9H), 1.06 (s, 9H); <sup>13</sup>C NMR (CDCl<sub>3</sub>, 150 MHz) δ 193.6, 152.8, 138.6, 135.4, 134.1, 131.2, 131.1, 130.5, 129.5, 127.3, 127.2, 127.0, 125.9, 125.5, 125.4, 125.0, 122.5, 121.9, 121.0, 34.6, 33.8, 28.4, 21.7, 20.2. HRMS (ESI-TOF) *m/z*: [M+H]<sup>+</sup> Calcd for C<sub>40</sub>H<sub>41</sub>O<sub>4</sub>S 617.2726; Found 617.2736.

**4-(12H-benzo[a]xanthen-12-ylidene)-2,6-di-tert-butylcyclohexa-2,5-dien-1-one (3a).**

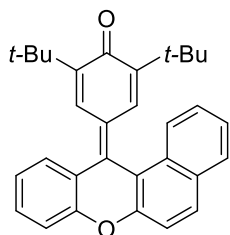

Orange solid; 42.98 mg, 99% yield (petroleum ether/ethyl acetate =30:1); mp 248.8-249.8 °C. <sup>1</sup>H NMR (CDCl<sub>3</sub>, 600 MHz) δ 8.00 (d, *J* = 8.40 Hz, 1H), 7.78 (m, 2H), 7.68 (m, 2H), 7.38-7.28 (m, 6H), 7.01 (d, *J* = 2.10 Hz, 1H), 1.25 (s, 9H), 0.93 (s, 9H); <sup>13</sup>C NMR (CDCl<sub>3</sub>, 150 MHz) δ 185.8, 153.0, 151.9, 146.9, 146.1, 134.9, 130.8, 129.7, 128.4, 127.1, 127.1, 125.7, 124.8, 124.0, 122.6, 117.7, 115.8, 115.8, 34.6, 34.2, 28.7, 28.2. HRMS (ESI-TOF) *m/z*: [M+H]<sup>+</sup> Calcd for C<sub>31</sub>H<sub>31</sub>O<sub>2</sub> 435.2324; Found 435.2321.

**4-(2-bromo-12H-benzo[a]xanthen-12-ylidene)-2,6-di-tert-butylcyclohexa-2,5-dien-1-one (3b).**

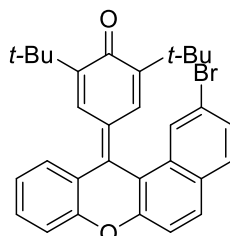

Orange solid; 47.11 mg, 92% yield (petroleum ether/ethyl acetate =30:1); mp 237.4-237.5 °C. <sup>1</sup>H NMR (CDCl<sub>3</sub>, 600 MHz) δ 8.14 (s, 1H), 7.76 (m, 1H), 7.67-7.63 (m, 3H), 7.38-7.29 (m, 5H), 6.99 (s, 1H), 1.25 (s, 9H), 0.99 (s, 9H); <sup>13</sup>C NMR (CDCl<sub>3</sub>, 150 MHz) δ 185.6, 152.8, 152.6, 147.2, 146.6, 133.9, 130.9, 129.6, 128.7, 127.4, 127.3, 127.1, 125.0, 123.8, 122.8, 121.5, 120.5, 116.5, 116.4, 115.7, 34.6, 34.3, 28.6, 28.2. HRMS (ESI-TOF) *m/z*: [M+H]<sup>+</sup> Calcd for C<sub>31</sub>H<sub>30</sub>BrO<sub>2</sub> 513.1429; Found

513.1432.

**4-(3-bromo-12H-benzo[a]xanthen-12-ylidene)-2,6-di-tert-butylcyclohexa-2,5-dien-1-one (3c).**

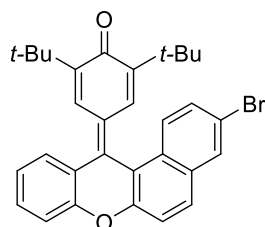

Orange solid; 47.62 mg, 93% yield (petroleum ether/ethyl acetate =30:1); mp 242.9-243.9 °C. <sup>1</sup>H NMR (CDCl<sub>3</sub>, 600 MHz) δ 7.94 (m, 2H), 7.73-7.65 (m, 3H), 7.44-7.28 (m, 5H), 6.92 (d, *J* = 2.58 Hz, 1H), 1.25 (s, 9H), 0.95 (s, 9H); <sup>13</sup>C NMR (CDCl<sub>3</sub>, 150 MHz) δ 185.7, 152.9, 152.1, 147.2, 146.5, 134.1, 130.8, 130.2, 128.8, 128.3, 127.1, 126.7, 125.0, 123.8, 122.8, 117.7, 117.4, 117.1, 115.8, 34.6, 34.3, 28.6, 28.3. HRMS (ESI-TOF) *m/z*: [M+H]<sup>+</sup> Calcd for C<sub>31</sub>H<sub>30</sub>BrO<sub>2</sub> 513.1429; Found 513.1426.

**4-(6-bromo-12H-benzo[a]xanthen-12-ylidene)-2,6-di-tert-butylcyclohexa-2,5-dien-1-one (3d).**

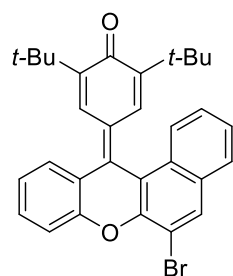

Orange solid; 48.65 mg, 95% yield (petroleum ether/ethyl acetate =30:1); mp 183.4-184.6 °C. <sup>1</sup>H NMR (CDCl<sub>3</sub>, 600 MHz) δ 8.10 (s, 1H), 7.94 (m, 1H), 7.67 (m, 3H), 7.42-7.30 (m, 5H), 6.90 (s, 1H), 1.25 (s, 9H), 0.92 (s, 9H); <sup>13</sup>C NMR (CDCl<sub>3</sub>, 150 MHz) δ 185.8, 152.9, 148.1, 147.4, 146.5, 133.8, 132.1, 130.1, 128.3, 126.2, 125.6, 124.9, 123.9, 123.1, 118.9, 116.2, 109.8, 34.6, 34.3, 28.6, 28.2. HRMS (ESI-TOF) *m/z*: [M+H]<sup>+</sup> Calcd for C<sub>31</sub>H<sub>30</sub>BrO<sub>2</sub> 513.1429; Found 513.1426.

**2,6-di-tert-butyl-4-(2-methoxy-12H-benzo[a]xanthen-12-ylidene)cyclohexa-2,5-dien-1-one (3e).**

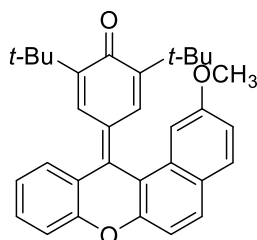

Orange solid; 41.78 mg, 90% yield (petroleum ether/ethyl acetate =30:1); mp 205.6-206.8 °C. <sup>1</sup>H NMR (CDCl<sub>3</sub>, 600 MHz) δ 7.73-7.67 (m, 4H), 7.28 (m, 5H), 7.09-7.04 (m, 2H), 3.75 (s, 3H), 1.25 (s, 9H), 0.95 (s, 9H); <sup>13</sup>C NMR (CDCl<sub>3</sub>, 150 MHz) δ 185.7, 157.7, 152.9, 152.6, 146.8, 146.0, 135.5, 131.1, 130.8, 128.8, 128.5, 127.1, 125.1, 124.3, 124.1, 122.5, 116.4, 115.8, 113.3, 104.0, 54.4, 34.6, 34.3, 28.6, 28.3. HRMS (ESI-TOF) *m/z*: [M+H]<sup>+</sup> Calcd for C<sub>32</sub>H<sub>33</sub>O<sub>3</sub> 465.2430; Found 465.2433.

**2,6-di-tert-butyl-4-(11-chloro-12H-benzo[a]xanthen-12-ylidene)cyclohexa-2,5-dien-1-one (3f).**

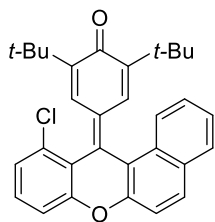

Orange solid; 41.66 mg, 89% yield (petroleum ether/ethyl acetate =30:1); mp 251.3-252.5 °C. <sup>1</sup>H NMR (CDCl<sub>3</sub>, 600 MHz) δ 8.06 (d, *J* = 8.46 Hz, 1H), 7.80-7.79 (m, 2H), 7.47 (m, 3H), 7.29-7.25 (m, 3H), 7.16 (m, 1H), 6.96 (d, *J* = 2.58 Hz, 1H), 1.22 (s, 9H), 0.92 (s, 9H); <sup>13</sup>C NMR (CDCl<sub>3</sub>, 150 MHz) δ 185.9, 154.8, 151.3, 146.6, 146.5, 131.2, 129.7, 129.4, 128.4, 126.8, 126.1, 124.7, 124.3, 123.5, 118.2, 115.6, 114.2, 34.4, 34.3, 28.5, 28.3. HRMS (ESI-TOF) *m/z*: [M+H]<sup>+</sup> Calcd for C<sub>31</sub>H<sub>30</sub>ClO<sub>2</sub> 469.1934; Found 469.1940.

**2,6-di-tert-butyl-4-(10-fluoro-12H-benzo[a]xanthen-12-ylidene)cyclohexa-2,5-dien-1-one (3g).**

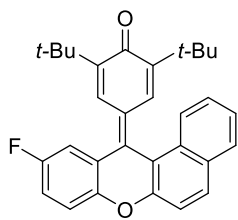

Orange solid; 42.05 mg, 93% yield (petroleum ether/ethyl acetate =30:1); mp 213.4-214.6 °C. <sup>1</sup>H NMR (CDCl<sub>3</sub>, 600 MHz) δ 7.96 (m, 1H), 7.84-7.68 (m, 2H), 7.68 (d, *J* = 2.70 Hz, 1H), 7.38 (m, 4H), 7.28 (m, 1H), 7.10-7.07 (m, 1H), 6.96 (d, *J* = 2.64 Hz, 1H), 1.27 (s, 9H), 0.92 (s, 9H); <sup>13</sup>C NMR (CDCl<sub>3</sub>, 150 MHz) δ 185.7, 158.5, 156.9, 152.1, 149.2, 149.2, 147.4, 146.4, 133.5, 130.6, 130.1, 129.7, 129.7, 127.8, 127.1, 125.8, 125.2, 125.1, 125.3, 124.8, 124.1, 117.0, 116.9, 116.6, 115.2, 113.3, 113.1, 34.6, 34.3, 28.6, 28.2. <sup>19</sup>F NMR (CDCl<sub>3</sub>, 377 MHz) δ -118.9. HRMS (ESI-TOF) *m/z*: [M+H]<sup>+</sup> Calcd for C<sub>31</sub>H<sub>30</sub>FO<sub>2</sub> 453.2230; Found 453.2239.

**2,6-di-tert-butyl-4-(10-methoxy-12H-benzo[a]xanthen-12-ylidene)cyclohexa-2,5-dien-1-one (3h).**

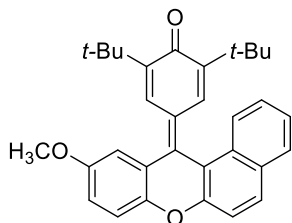

Orange solid; 42.71 mg, 92% yield (petroleum ether/ethyl acetate =30:1); mp 228.5-229.8 °C. <sup>1</sup>H NMR (CDCl<sub>3</sub>, 600 MHz) δ 7.99 (d, *J* = 8.40 Hz, 1H), 7.80 (m, 3H), 7.76-7.35 (m, 3H), 7.25 (m, 2H), 7.00-6.94 (m, 2H), 3.83 (s, 3H), 1.27 (s, 9H), 0.92 (s, 9H); <sup>13</sup>C NMR (CDCl<sub>3</sub>, 150 MHz) δ 185.7, 154.8, 152.3, 147.4, 146.9, 145.0, 137.7, 135.1, 130.9, 129.6, 128.1, 127.0, 125.7, 124.9, 124.7, 124.4, 123.9, 116.8, 116.6, 115.9, 115.7, 110.4, 54.9, 54.7, 34.6, 34.2, 28.8, 28.2. HRMS (ESI-TOF)



m/z: [M+H]<sup>+</sup> Calcd for C<sub>32</sub>H<sub>33</sub>O<sub>3</sub> 465.2430; Found 465.2419.

**2,6-di-tert-butyl-4-(9-methyl-12H-benzo[a]xanthen-12-ylidene)cyclohexa-2,5-dien-1-one (3i).**

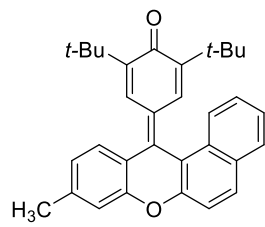

Orange solid; 41.24 mg, 92% yield (petroleum ether/ethyl acetate =30:1); mp 271.3-272.5 °C. <sup>1</sup>H NMR (CDCl<sub>3</sub>, 600 MHz) δ 8.00 (d, *J* = 8.40 Hz, 1H), 7.78 (m, 3H), 7.56 (m, 1H), 7.40-7.35 (m, 3H), 7.16 (s, 1H), 7.09 (d, *J* = 7.86 Hz, 1H), 7.00 (s, 1H), 2.39 (s, 3H), 1.26 (s, 9H), 0.92 (s, 9H); <sup>13</sup>C NMR (CDCl<sub>3</sub>, 150 MHz) δ 185.8, 152.9, 151.9, 146.7, 145.8, 139.2, 135.3, 130.9, 129.6, 128.7, 127.0, 126.8, 125.6, 125.0, 124.3, 123.9, 123.7, 121.4, 117.3, 116.1, 115.8, 34.6, 34.2, 28.7, 28.2, 20.4. HRMS (ESI-TOF) m/z: [M+H]<sup>+</sup> Calcd for C<sub>32</sub>H<sub>33</sub>O<sub>2</sub> 449.2481; Found 449.2487.

**2,6-di-tert-butyl-4-(8-chloro-12H-benzo[a]xanthen-12-ylidene)cyclohexa-2,5-dien-1-one (3j).**

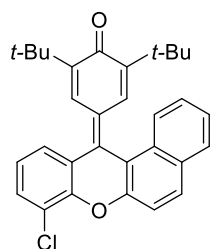

Orange solid; 43.54 mg, 93% yield (petroleum ether/ethyl acetate =30:1); mp 258.2-259.5 °C. <sup>1</sup>H NMR (CDCl<sub>3</sub>, 600 MHz) δ 7.97 (d, *J* = 8.34 Hz, 1H), 7.84 (d, *J* = 7.84 Hz, 1H), 7.78 (d, *J* = 7.98 Hz, 1H), 7.61 (m, 3H), 7.38 (m, 3H), 7.18 (m, 1H), 6.98 (s, 1H), 1.24 (s, 9H), 0.92 (s, 9H); <sup>13</sup>C NMR (CDCl<sub>3</sub>, 150 MHz) δ 185.8, 151.7, 148.9, 147.3, 146.5, 133.7, 130.5, 130.1, 130.0, 128.8, 128.1, 127.2, 125.8, 125.6, 125.5, 124.9, 124.3, 122.7, 121.5, 117.1, 115.9, 34.6, 34.3, 28.6, 28.2. HRMS (ESI-TOF) m/z: [M+H]<sup>+</sup> Calcd for C<sub>31</sub>H<sub>30</sub>ClO<sub>2</sub> 469.1934; Found 469.1924.

**2,6-di-tert-butyl-4-(14H-dibenzo[a,h]xanthen-14-ylidene)cyclohexa-2,5-dien-1-one (3k).**

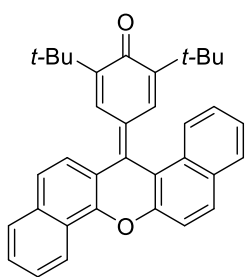

Orange solid; 44.07 mg, 91% yield (petroleum ether/ethyl acetate =30:1); mp 266.7-267.8 °C. <sup>1</sup>H NMR (CDCl<sub>3</sub>, 600 MHz) δ 8.49 (d, *J* = 8.16 Hz, 1H), 8.09 (d, *J* = 8.40 Hz, 1H), 7.78 (m, 6H), 7.58-7.51 (m, 3H), 7.38 (m, 2H), 7.08 (d, *J* = 2.58 Hz, 1H), 1.25 (s, 9H), 0.94 (s, 9H); <sup>13</sup>C NMR (CDCl<sub>3</sub>, 150 MHz) δ 185.4, 151.8, 148.9, 146.9, 145.9, 130.8, 129.7, 129.6, 128.8, 127.1, 126.8, 126.6, 125.8, 125.7, 125.1, 124.3, 124.2, 124.1, 122.8, 122.2, 121.1, 118.6, 117.4, 115.8, 34.6, 34.3,

28.7, 28.2. HRMS (ESI-TOF) m/z: [M+H]<sup>+</sup> Calcd for C<sub>35</sub>H<sub>33</sub>O<sub>2</sub> 485.2481; Found 485.2487.

**1'-(2-bromophenyl)-3,5-di-tert-butyl-1'H-spiro[cyclohexane-1,2'-naphtho[2,1-b]furan]-2,5-dien-4-one (4a).**

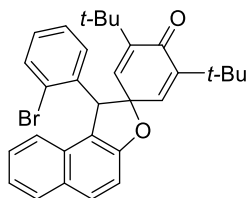

White solid; 50.90 mg, 99% yield (petroleum ether/ethyl acetate =30:1); mp 157.8-158.8 °C. <sup>1</sup>H NMR (CDCl<sub>3</sub>, 600 MHz) δ 7.80 (d, *J* = 8.76 Hz, 2H), 7.50 (m, 1H), 7.21 (m, 3H), 7.06-7.00 (m, 3H), 6.70 (d, *J* = 2.94 Hz, 1H), 6.53 (m, 1H), 5.98 (d, *J* = 2.88 Hz, 1H), 5.46 (s, 1H), 1.18 (s, 9H), 0.89 (s, 9H); <sup>13</sup>C NMR (CDCl<sub>3</sub>, 150 MHz) δ 184.6, 155.7, 146.0, 144.8, 137.2, 137.2, 136.0, 132.0, 130.0, 129.2, 129.0, 127.9, 126.5, 126.3, 124.6, 122.5, 122.1, 118.4, 111.6, 84.7, 54.5, 33.8, 33.7, 28.4, 28.0. HRMS (ESI-TOF) m/z: [M+H]<sup>+</sup> Calcd for C<sub>31</sub>H<sub>32</sub>BrO<sub>2</sub> 515.1586; Found 515.1596.

**4'-bromo-1'-(2-bromophenyl)-3,5-di-tert-butyl-1'H-spiro[cyclohexane-1,2'-naphtho[2,1-b]furan]-2,5-dien-4-one (4b).**

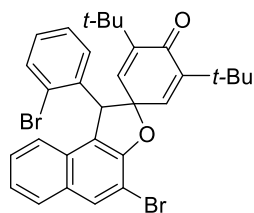

White solid; 55.65 mg, 94% yield (petroleum ether/ethyl acetate =30:1); mp 166.5-167.5 °C. <sup>1</sup>H NMR (CDCl<sub>3</sub>, 600 MHz) δ 8.02 (m, 1H), 7.72 (m, 1H), 7.50 (m, 1H), 7.24 (m, 2H), 7.02 (m, 3H), 6.69 (m, 1H), 6.53 (d, *J* = 5.82 Hz, 1H), 6.00 (s, 1H), 5.56 (s, 1H), 1.19 (s, 9H), 0.89 (s, 9H); <sup>13</sup>C NMR (CDCl<sub>3</sub>, 150 MHz) δ 184.4, 152.8, 146.1, 145.0, 136.8, 136.7, 135.7, 132.1, 131.9, 129.9, 129.1, 128.1, 127.0, 126.6, 126.5, 124.5, 123.4, 122.3, 119.9, 104.4, 85.4, 55.5, 33.8, 30.0, 28.4, 28.0. HRMS (ESI-TOF) m/z: [M+H]<sup>+</sup> Calcd for C<sub>31</sub>H<sub>31</sub>Br<sub>2</sub>O<sub>2</sub> 595.0670; Found 595.0686.

**7'-bromo-1'-(2-bromophenyl)-3,5-di-tert-butyl-1'H-spiro[cyclohexane-1,2'-naphtho[2,1-b]furan]-2,5-dien-4-one (4c).**

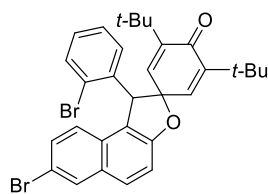

White solid; 57.43 mg, 97% yield (petroleum ether/ethyl acetate =30:1); mp 183.5-184.5 °C. <sup>1</sup>H NMR (CDCl<sub>3</sub>, 600 MHz) δ 7.95 (s, 1H), 7.70 (m, 1H), 7.50 (m, 1H), 7.20 (m, 2H), 6.92 (m, 3H), 6.68 (m, 1H), 6.48 (m, 1H), 5.96 (d, *J* = 3.12 Hz, 1H), 5.44 (s, 1H), 1.18 (s, 9H), 0.88 (s, 9H); <sup>13</sup>C NMR (CDCl<sub>3</sub>, 150 MHz) δ 184.5,

156.0, 146.1, 145.0, 136.9, 136.9, 135.7, 132.1, 129.5, 129.1, 129.0, 127.9, 126.5, 124.6, 123.8, 118.8, 116.1, 112.7, 84.9, 54.4, 33.8, 28.4, 28.0. HRMS (ESI-TOF) m/z: [M+H]<sup>+</sup> Calcd for C<sub>31</sub>H<sub>31</sub>Br<sub>2</sub>O<sub>2</sub> 595.0670; Found 595.0686.

**8'-bromo-1'-(2-bromophenyl)-3,5-di-tert-butyl-1'H-spiro[cyclohexane-1,2'-naphtho[2,1-b]furan]-2,5-dien-4-one (4d).**

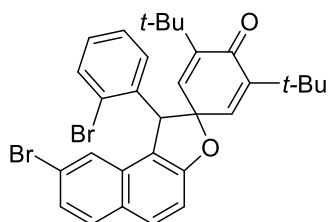

White solid; 58.61 mg, 99% yield (petroleum ether/ethyl acetate =30:1); mp 165.4-166.6 °C. <sup>1</sup>H NMR (CDCl<sub>3</sub>, 600 MHz) δ 7.75 (d, *J* = 8.88 Hz, 1H), 7.64 (d, *J* = 8.76 Hz, 1H), 7.51 (m, 1H), 7.50 (m, 1H), 7.19 (m, 2H), 7.02 (m, 2H), 6.65 (m, 1H), 6.49 (m, 1H), 5.92 (d, *J* = 3.12 Hz, 1H), 5.39 (s, 1H), 1.18 (s, 9H), 0.89 (s, 9H); <sup>13</sup>C NMR (CDCl<sub>3</sub>, 150 MHz) δ 184.4, 156.5, 146.2, 145.0, 136.8, 136.6, 135.6, 132.2, 130.1, 128.9, 128.1, 127.3, 126.6, 126.0, 124.6, 124.1, 120.8, 117.7, 112.0, 85.0, 54.2, 33.8, 28.7, 28.4, 28.0. HRMS (ESI-TOF) m/z: [M+H]<sup>+</sup> Calcd for C<sub>31</sub>H<sub>31</sub>Br<sub>2</sub>O<sub>2</sub> 595.0670; Found 595.0686.

**1'-(2-bromophenyl)-3,5-di-tert-butyl-8'-methoxy-1'H-spiro[cyclohexane-1,2'-naphtho[2,1-b]furan]-2,5-dien-4-one (4e).**

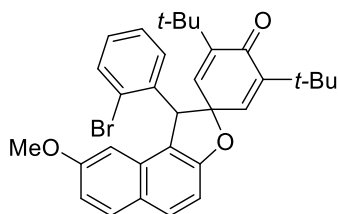

White solid; 52.24 mg, 96% yield (petroleum ether/ethyl acetate =30:1); mp 136.7-137.7 °C. <sup>1</sup>H NMR (CDCl<sub>3</sub>, 600 MHz) δ 7.71-7.67 (m, 2H), 7.49 (m, 1H), 6.99 (m, 3H), 6.89 (m, 1H), 6.87 (m, 1H), 6.58 (m, 1H), 6.29 (d, *J* = 2.22 Hz, 1H), 6.01 (d, *J* = 3.06 Hz, 1H), 5.41 (s, 1H), 3.55 (s, 3H), 1.18 (s, 9H), 0.88 (s, 9H); <sup>13</sup>C NMR (CDCl<sub>3</sub>, 150 MHz) δ 184.6, 157.6, 156.2, 145.9, 144.8, 137.4, 136.8, 136.2, 131.9, 130.7, 129.2, 127.9, 126.5, 124.5, 124.2, 117.7, 114.7, 108.9, 100.9, 84.6, 54.6, 54.0, 33.8, 33.7, 28.4, 28.0. HRMS (ESI-TOF) m/z: [M+H]<sup>+</sup> Calcd for C<sub>32</sub>H<sub>34</sub>BrO<sub>3</sub> 545.1691; Found 545.1697.

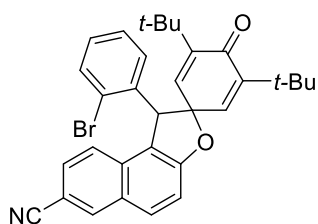

**1'-(2-bromophenyl)-3,5-di-tert-butyl-4-oxo-1'H-spiro[cyclohexane-1,2'-naphtho[2,1-b]furan]-2,5-diene-7'-carbonitrile (4f).**

White solid; 51.76 mg, 96% yield (petroleum ether/ethyl

acetate =30:1); mp 133.4-134.6 °C. <sup>1</sup>H NMR (CDCl<sub>3</sub>, 600 MHz) δ 8.17 (s, 1H), 7.86 (d, *J* = 8.94 Hz, 1H), 7.51 (m, 1H), 7.36-7.30 (m, 2H), 7.01 (m, 3H), 6.66 (d, *J* = 3.12 Hz, 1H), 6.47 (m, 1H), 5.95 (d, *J* = 3.12 Hz, 1H), 5.47 (s, 1H), 1.19 (s, 9H), 0.88 (s, 9H); <sup>13</sup>C NMR (CDCl<sub>3</sub>, 150 MHz) δ 184.3, 158.2, 146.4, 145.3, 136.5, 136.4, 135.2, 134.0, 132.3, 130.8, 128.9, 128.3, 127.8, 126.9, 126.6, 124.7, 123.3, 119.2, 118.3, 113.6, 105.8, 85.5, 54.1, 33.9, 33.8, 30.0, 28.4, 28.0. HRMS (ESI-TOF) *m/z*: [M+H]<sup>+</sup> Calcd for C<sub>32</sub>H<sub>31</sub>BrNO<sub>2</sub> 540.1538; Found 540.1528.

**8'-(2-bromophenyl)-3,5-di-tert-butyl-8'H-spiro[cyclohexane-1,7'-[1,3]dioxolo[4,5-e]benzofuran]-2,5-dien-4-one (4g).**

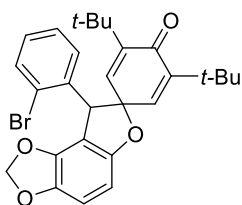

White solid; 49.80 mg, 98% yield (petroleum ether/ethyl acetate =30:1); mp 145.6-146.6 °C. <sup>1</sup>H NMR (CDCl<sub>3</sub>, 600 MHz) δ 7.43 (d, *J* = 7.92 Hz, 1H), 7.16 (m, 1H), 7.01 (m, 1H), 6.68 (m, 2H), 6.45 (d, *J* = 3.48 Hz, 2H), 5.91 (m, 3H), 5.04 (s, 1H), 1.18 (s, 9H), 0.85 (s, 9H); <sup>13</sup>C NMR (CDCl<sub>3</sub>, 150 MHz) δ 184.5, 152.4, 147.6, 145.8, 144.9, 141.6, 138.0, 137.2, 135.7, 131.9, 129.4, 127.9, 126.4, 124.8, 118.2, 104.6, 100.5, 92.7, 84.8, 55.1, 33.8, 33.7, 28.7, 28.3, 27.9. HRMS (ESI-TOF) *m/z*: [M+H]<sup>+</sup> Calcd for C<sub>28</sub>H<sub>30</sub>BrO<sub>4</sub> 509.1327; Found 509.1332.

**3-(2-bromophenyl)-3',5'-di-tert-butyl-4,5-dimethoxy-3H-spiro[benzofuran-2,1'-cyclohexane]-2',5'-dien-4'-one (4h).**

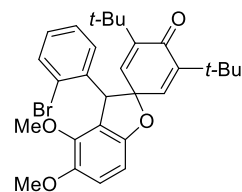

White solid; 51.37 mg, 98% yield (petroleum ether/ethyl acetate =30:1); mp 188.0-189.3 °C. <sup>1</sup>H NMR (CDCl<sub>3</sub>, 600 MHz) δ 7.44 (d, *J* = 7.92 Hz, 1H), 7.05 (m, 1H), 7.02 (m, 1H), 6.68 (m, 2H), 6.55 (s, 1H), 6.51 (s, 1H), 5.91 (d, *J* = 3.06 Hz, 1H), 5.10 (s, 1H), 3.85 (s, 3H), 3.72 (s, 3H), 1.19 (s, 9H), 0.86 (s, 9H); <sup>13</sup>C NMR (CDCl<sub>3</sub>, 150 MHz) δ 184.5, 152.0, 149.5, 145.8, 144.8, 143.4, 138.2, 137.4, 135.9, 131.9, 129.5, 127.9, 126.4, 124.8, 116.9, 108.1, 94.4, 84.7, 55.7, 55.4, 55.1, 33.8, 33.7, 28.3, 27.9. HRMS (ESI-TOF) *m/z*: [M+H]<sup>+</sup> Calcd for C<sub>29</sub>H<sub>34</sub>BrO<sub>4</sub> 525.1640; Found 525.1650.

**1'-(2-bromo-5-methoxyphenyl)-3,5-di-tert-butyl-1'H-spiro[cyclohexane-1,2'-naphtho[2,1-b]furan]-2,5-dien-4-one (4i).**

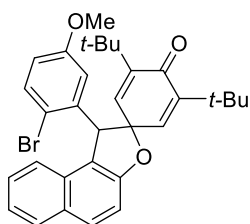

White solid; 53.33 mg, 98% yield (petroleum ether/ethyl acetate =30:1); mp 170.2-171.5 °C. <sup>1</sup>H NMR (CDCl<sub>3</sub>, 600 MHz) 7.78 (d, *J* = 9.00 Hz, 2H), 7.38-7.17 (m, 4H), 7.09 (d, *J* = 8.70 Hz, 1H), 6.67 (s, 1H), 6.57 (m, 1H), 6.08 (d, *J* = 3.06 Hz, 1H), 6.03 (d, *J* = 3.12 Hz, 1H), 5.38 (s, 1H), 3.44 (s, 3H), 1.17 (s, 9H), 0.92 (s, 9H); <sup>13</sup>C NMR (CDCl<sub>3</sub>, 150 MHz) δ 184.6, 158.0, 155.6, 146.1, 144.8, 138.2, 137.2, 135.9, 132.5, 130.1, 129.5, 128.9, 127.9, 126.3, 122.4, 122.1, 118.3, 115.6, 115.0, 112.9, 111.6, 84.7, 54.5, 54.3, 33.8, 33.7, 28.7, 28.4, 28.0. HRMS (ESI-TOF) *m/z*: [M+H]<sup>+</sup> Calcd for C<sub>32</sub>H<sub>34</sub>BrO<sub>3</sub> 545.1691; Found 545.1697.

**1'-(2-bromo-4-methylphenyl)-3,5-di-tert-butyl-1'H-spiro[cyclohexane-1,2'-naphtho[2,1-b]furan]-2,5-dien-4-one (4j).**

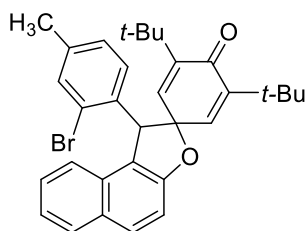

White solid; 49.65 mg, 94% yield (petroleum ether/ethyl acetate =30:1); mp 122.7-123.8 °C. <sup>1</sup>H NMR (CDCl<sub>3</sub>, 600 MHz) δ 7.78 (d, *J* = 8.82 Hz, 2H), 7.32-7.17 (m, 4H), 7.07 (m, 2H), 6.68 (s, 1H), 6.40 (d, *J* = 7.92 Hz, 1H), 6.00 (d, *J* = 2.70 Hz, 1H), 5.42 (s, 1H), 2.19 (s, 3H), 1.17 (s, 9H), 0.90 (s, 9H); <sup>13</sup>C NMR (CDCl<sub>3</sub>, 150 MHz) δ 184.6, 155.6, 145.9, 144.7, 138.1, 137.3, 136.2, 134.0, 132.3, 129.9, 128.9, 128.8, 127.3, 126.2, 124.3, 122.4, 122.1, 118.6, 111.6, 84.8, 54.2, 33.8, 33.7, 28.4, 28.0, 19.6. HRMS (ESI-TOF) *m/z*: [M+H]<sup>+</sup> Calcd for C<sub>32</sub>H<sub>34</sub>BrO<sub>2</sub> 529.1742; Found 529.1748.

**3,5-di-tert-butyl-1'-(2,6-dibromophenyl)-1'H-spiro[cyclohexane-1,2'-naphtho[2,1-b]furan]-2,5-dien-4-one (4k).**

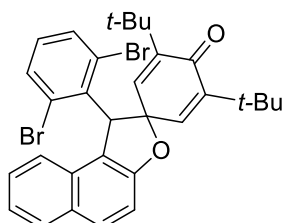

White solid; 55.65 mg, 94% yield (petroleum ether/ethyl acetate =30:1); mp 149.3-150.5 °C. <sup>1</sup>H NMR (CDCl<sub>3</sub>, 600 MHz) δ 7.77 (d, *J* = 8.70 Hz, 2H), 7.54 (m, 1H), 7.22 (m, 3H), 7.11 (m, 1H), 6.95 (m, 1H), 6.87-6.85 (m, 1H), 6.76-6.73 (m, 2H), 5.99 (s, 1H), 1.19 (s, 9H), 0.88 (s, 9H); <sup>13</sup>C NMR (CDCl<sub>3</sub>, 150 MHz) δ 184.7, 156.9, 146.7, 144.4, 138.0, 136.3, 135.2, 133.8, 131.8, 129.9, 129.7, 128.4, 127.4, 126.2, 123.7, 122.3, 121.0, 118.1, 111.6, 84.7, 56.3, 33.8, 28.3, 28.1. HRMS

(ESI-TOF) m/z: [M+H]<sup>+</sup> Calcd for C<sub>31</sub>H<sub>31</sub>Br<sub>2</sub>O<sub>2</sub> 595.0670; Found 595.0673.

**1'-(2-bromo-6-chlorophenyl)-3,5-di-tert-butyl-1'H-spiro[cyclohexane-1,2'-naphtho[2,1-b]furan]-2,5-dien-4-one (4l).**

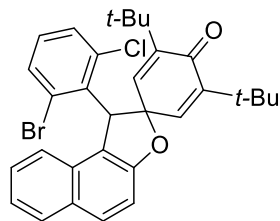

White solid; 52.62 mg, 96% yield (petroleum ether/ethyl acetate =30:1); mp 142.6-143.6 °C. <sup>1</sup>H NMR (CDCl<sub>3</sub>, 600 MHz) δ 7.78-7.50 (m, 2H), 7.21 (m, 3H), 7.12 (m, 2H), 6.98-6.94 (m, 2H), 6.75-6.70 (m, 2H), 5.98-5.94 (m, 1H), 1.18 (s, 9H), 0.87 (d, *J* = 3.84 Hz, 9H); <sup>13</sup>C NMR (CDCl<sub>3</sub>, 150 MHz) δ 184.7, 156.8, 156.3, 146.7, 146.6, 144.4, 138.1, 138.0, 136.1, 134.9, 134.4, 133.8, 133.0, 131.1, 129.5, 127.9, 126.9, 126.1, 123.7, 122.3, 121.0, 120.8, 118.2, 117.8, 111.6, 111.6, 84.8, 55.5, 53.3, 33.8, 28.3, 28.0. HRMS (ESI-TOF) m/z: [M+H]<sup>+</sup> Calcd for C<sub>31</sub>H<sub>31</sub>BrClO<sub>2</sub> 549.1196; Found 549.1186.

**3,5-di-tert-butyl-1'-(2-chlorophenyl)-1'H-spiro[cyclohexane-1,2'-naphtho[2,1-b]furan]-2,5-dien-4-one (4m).**

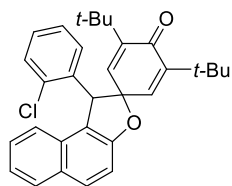

White solid; 45.14 mg, 96% yield (petroleum ether/ethyl acetate =30:1); mp 141.3-142.5 °C. <sup>1</sup>H NMR (CDCl<sub>3</sub>, 600 MHz) δ 7.79 (d, *J* = 8.70 Hz, 2H), 7.24 (m, 4H), 7.06 (m, 2H), 6.95 (m, 1H), 6.70 (d, *J* = 3.12 Hz, 1H), 6.55 (d, *J* = 9.12 Hz, 1H), 5.99 (s, 1H), 5.47 (s, 1H), 1.18 (s, 9H), 0.87 (s, 9H); <sup>13</sup>C NMR (CDCl<sub>3</sub>, 150 MHz) δ 184.6, 155.7, 145.9, 144.8, 137.3, 135.9, 135.4, 133.7, 130.0, 128.9, 128.9, 128.7, 127.9, 127.6, 126.2, 125.9, 122.4, 122.1, 117.9, 111.6, 84.8, 52.2, 33.7, 28.7, 28.3, 27.9. HRMS (ESI-TOF) m/z: [M+H]<sup>+</sup> Calcd for C<sub>31</sub>H<sub>32</sub>ClO<sub>2</sub> 471.2091; Found 471.2099.

**3,5-di-tert-butyl-1'-phenyl-1'H-spiro[cyclohexane-1,2'-naphtho[2,1-b]furan]-2,5-dien-4-one (4n).**

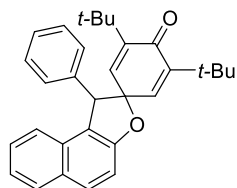

White solid; 41.88 mg, 96% yield (petroleum ether/ethyl acetate =30:1); mp 174.2-175.2 °C. <sup>1</sup>H NMR (CDCl<sub>3</sub>, 600 MHz) δ 7.78 (d, *J* = 8.40 Hz, 2H), 7.22-7.15 (m, 9H), 6.74 (d, *J* = 3.06 Hz, 1H), 6.09 (d, *J* = 3.00 Hz, 1H), 4.89 (s, 1H), 1.20 (s, 9H), 0.82 (s, 9H); <sup>13</sup>C NMR (CDCl<sub>3</sub>, 150 MHz) δ 185.1, 155.5, 145.6, 145.3, 138.0, 137.2, 136.8, 129.8, 129.8, 129.0, 127.9, 127.6, 127.0, 126.6, 125.9, 122.3, 118.5, 111.7, 85.4, 57.3, 33.8,

33.5, 28.4, 27.8, 27.7. HRMS (ESI-TOF)  $m/z$ :  $[M+H]^+$  Calcd for  $C_{31}H_{33}O_2$  437.2481; Found 437.2487.

**3,5-di-tert-butyl-1'-(2-methoxyphenyl)-1'H-spiro[cyclohexane-1,2'-naphtho[2,1-b]furan]-2,5-dien-4-one (4o).**

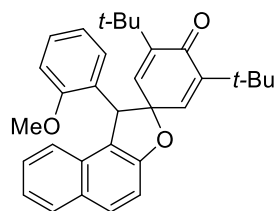

White solid; 46.16 mg, 99% yield (petroleum ether/ethyl acetate =30:1); mp 80.3-81.3 °C.  $^1H$  NMR ( $CDCl_3$ , 600 MHz)  $\delta$  7.79-7.75 (m, 2H), 7.22-7.09 (m, 5H), 7.09 (m, 2H), 6.61 (m, 1H), 6.48 (d,  $J$  = 5.94 Hz, 1H), 6.05 (d,  $J$  = 3.06 Hz, 1H), 5.44 (s, 1H), 3.61 (s, 3H), 1.21 (s, 9H), 0.85 (s, 9H);  $^{13}C$  NMR ( $CDCl_3$ , 150 MHz)  $\delta$  185.8, 155.9, 155.7, 144.7, 143.9, 138.3, 136.9, 129.8, 129.5, 128.8, 127.3, 125.8, 122.5, 122.1, 119.1, 117.9, 111.5, 108.8, 85.0, 53.8, 49.1, 33.6, 33.5, 28.4, 28.0, 27.9, 27.3. HRMS (ESI-TOF)  $m/z$ :  $[M+H]^+$  Calcd for  $C_{32}H_{35}O_3$  467.2586; Found 467.2595.

**3,5-di-tert-butyl-1'-(4-(tert-butyl)phenyl)-1'H-spiro[cyclohexane-1,2'-naphtho[2,1-b]furan]-2,5-dien-4-one (4p).**

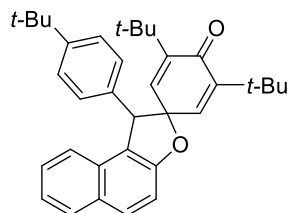

White solid; 47.75 mg, 97% yield (petroleum ether/ethyl acetate =30:1); mp 202.2-203.2 °C.  $^1H$  NMR ( $CDCl_3$ , 600 MHz)  $\delta$  7.79-7.77 (m, 2H), 7.23-7.17 (m, 7H), 6.73 (d,  $J$  = 3.00 Hz, 2H), 6.06 (d,  $J$  = 3.00 Hz, 1H), 4.88 (s, 1H), 1.20 (s, 9H), 1.18 (s, 9H), 0.79 (s, 9H);  $^{13}C$  NMR ( $CDCl_3$ , 150 MHz)  $\delta$  185.1, 155.5, 149.6, 145.3, 145.2, 138.0, 137.5, 133.7, 129.8, 129.7, 128.9, 127.8, 125.8, 124.5, 122.5, 122.2, 118.6, 111.6, 85.5, 56.9, 33.7, 33.5, 33.4, 30.3, 28.4, 27.8. HRMS (ESI-TOF)  $m/z$ :  $[M+H]^+$  Calcd for  $C_{35}H_{41}O_2$  493.3107; Found 493.3117.

**1'-(4-(benzyloxy)phenyl)-3,5-di-tert-butyl-1'H-spiro[cyclohexane-1,2'-naphtho[2,1-b]furan]-2,5-dien-4-one (4q).**

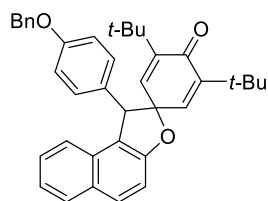

White solid; 53.14 mg, 98% yield (petroleum ether/ethyl acetate =30:1); mp 161.5-162.8 °C.  $^1H$  NMR ( $CDCl_3$ , 600 MHz)  $\delta$  7.77 (m, 2H), 7.22-7.16 (m, 10H), 6.72 (m, 4H), 6.09 (d,  $J$  = 3.00 Hz, 1H), 4.93 (s, 1H), 4.84 (s, 2H), 1.19 (s, 9H), 0.84 (s, 9H);  $^{13}C$  NMR ( $CDCl_3$ , 150 MHz)  $\delta$  186.2, 158.3, 156.4, 146.6, 146.3, 139.2, 139.0, 138.7, 138.1, 136.9, 130.8, 130.7, 130.3, 130.0, 128.9, 128.5, 127.9, 127.3,

126.8, 123.4, 123.3, 123.2, 119.8, 115.0, 112.8, 112.6, 86.6, 70.0, 57.5, 34.6, 29.4, 29.0. HRMS (ESI-TOF) m/z: [M+H]<sup>+</sup> Calcd for C<sub>38</sub>H<sub>39</sub>O<sub>3</sub> 543.2899; Found 543.2893.

**3,5-di-tert-butyl-1'-(naphthalen-1-yl)-1'H-spiro[cyclohexane-1,2'-naphtho[2,1-b]furan]-2,5-dien-4-one (4r).**

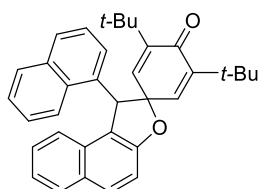

White solid; 46.19 mg, 95% yield (petroleum ether/ethyl acetate =30:1); mp 103.5-104.7 °C. <sup>1</sup>H NMR (CDCl<sub>3</sub>, 600 MHz) δ 7.84-7.77 (m, 4H), 7.64 (d, *J* = 8.16 Hz, 1H), 7.34 (m, 4H), 7.17 (m, 2H), 7.04 (m, 1H), 6.87 (s, 1H), 6.73 (s, 1H), 5.92 (d, *J* = 2.52 Hz, 1H), 5.80 (s, 1H), 1.27 (s, 9H), 0.38 (s, 9H); <sup>13</sup>C NMR (CDCl<sub>3</sub>, 150 MHz) δ 184.4, 155.8, 145.3, 145.1, 137.5, 136.3, 133.4, 132.9, 131.3, 129.8, 129.0, 127.8, 126.9, 126.0, 124.9, 124.2, 122.5, 122.3, 122.3, 118.2, 111.6, 84.9, 51.7, 51.1, 33.9, 33.2, 28.6, 28.3, 27.5, 27.3. HRMS (ESI-TOF) m/z: [M+H]<sup>+</sup> Calcd for C<sub>35</sub>H<sub>35</sub>O<sub>2</sub> 487.2637; Found 487.2640.

**1'-(2-bromophenyl)-3,5-diisopropyl-1'H-spiro[cyclohexane-1,2'-naphtho[2,1-b]furan]-2,5-dien-4-one (4s).**

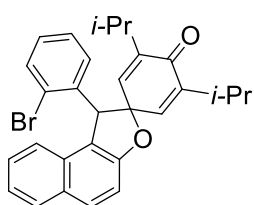

White solid; 44.24 mg, 91% yield (petroleum ether/ethyl acetate =30:1); mp 125.1-125.3 °C. <sup>1</sup>H NMR (CDCl<sub>3</sub>, 600 MHz) δ 7.81-7.79 (m, 2H), 7.48 (m, 1H), 7.26-7.18 (m, 3H), 7.06-6.99 (m, 3H), 6.67 (s, 1H), 6.55 (t, *J* = 7.26 Hz, 1H), 5.95 (s, 1H), 5.47 (s, 1H), 3.01-2.94 (m, 1H), 2.84-2.77 (m, 1H), 1.04 (d, *J* = 6.84 Hz, 3H), 0.99 (d, *J* = 6.90 Hz, 3H), 0.76 (d, *J* = 6.84 Hz, 3H), 0.58 (d, *J* = 6.90 Hz, 3H); <sup>13</sup>C NMR (CDCl<sub>3</sub>, 150 MHz) δ 183.6, 155.7, 144.4, 142.8, 137.3, 137.0, 135.6, 132.1, 130.0, 129.3, 129.0, 127.9, 126.3, 124.6, 122.5, 122.1, 118.4, 111.7, 84.3, 54.2, 25.4, 25.1, 21.2, 20.4, 20.3. HRMS (ESI-TOF) m/z: [M+H]<sup>+</sup> Calcd for C<sub>29</sub>H<sub>28</sub>BrO<sub>2</sub> 487.1273; Found 487.1265.

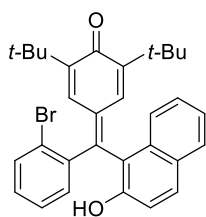

**2,6-di-tert-butyl-4-((2-bromophenyl)(2-hydroxynaphthalen-1-yl)methylene)cyclohexa-2,5-dienone (5a).**

Yellow solid; 43.30 mg, 92% yield (petroleum ether/ethyl acetate =30:1); mp 210.4-211.5 °C. <sup>1</sup>H NMR (CDCl<sub>3</sub>, 600 MHz) δ



7.74-7.58 (m, 5H), 7.23-6.98 (m, 6H), 6.60 (s, 1H), 5.54 (s, 1H), 1.20 (s, 9H), 1.05 (s, 3H), 0.93 (s, 6H);  $^{13}\text{C}$  NMR ( $\text{CDCl}_3$ , 150 MHz)  $\delta$  185.5, 151.2, 149.6, 148.8, 148, 147.7, 147.3, 141.8, 138.4, 130.7, 128.7, 126.4, 122.1, 118.5, 117.9, 117.1, 116.5, 34.4, 34.1, 28.5, 28.3. HRMS (ESI-TOF)  $m/z$ :  $[\text{M}+\text{H}]^+$  Calcd for  $\text{C}_{31}\text{H}_{32}\text{BrO}_2$  515.1586; Found 515.1595.

**2,6-di-tert-butyl-4-(12H-benzo[a]xanthen-12-yl)phenol (6).**

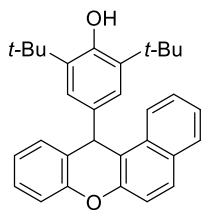

White solid; 41.88 mg, 96% yield (petroleum ether); mp 115.2-116.5  $^{\circ}\text{C}$ .  $^1\text{H}$  NMR ( $\text{CDCl}_3$ , 600 MHz)  $\delta$  7.95 (d,  $J = 8.52$  Hz, 1H), 7.67 (m, 2H) 7.31 (m, 4H), 7.14-7.09 (m, 2H), 6.99-6.96 (m, 3H), 5.64 (s, 1H), 4.85 (s, 1H), 1.21 (s, 18H);  $^{13}\text{C}$  NMR ( $\text{CDCl}_3$ , 150 MHz)  $\delta$  151.1, 149.9, 148.6, 135.7, 134.7, 130.7, 129.8, 128.2, 127.6, 127.5, 126.3, 125.4, 125.1, 122.9, 122.8, 122.6, 122.1, 117.0, 116.2, 115.5, 40.6, 33.2, 29.2. HRMS (ESI-TOF)  $m/z$ :  $[\text{M}+\text{H}]^+$  Calcd for  $\text{C}_{31}\text{H}_{33}\text{O}_2$  437.2481; Found 437.2487.

## 10. NMR Spectra

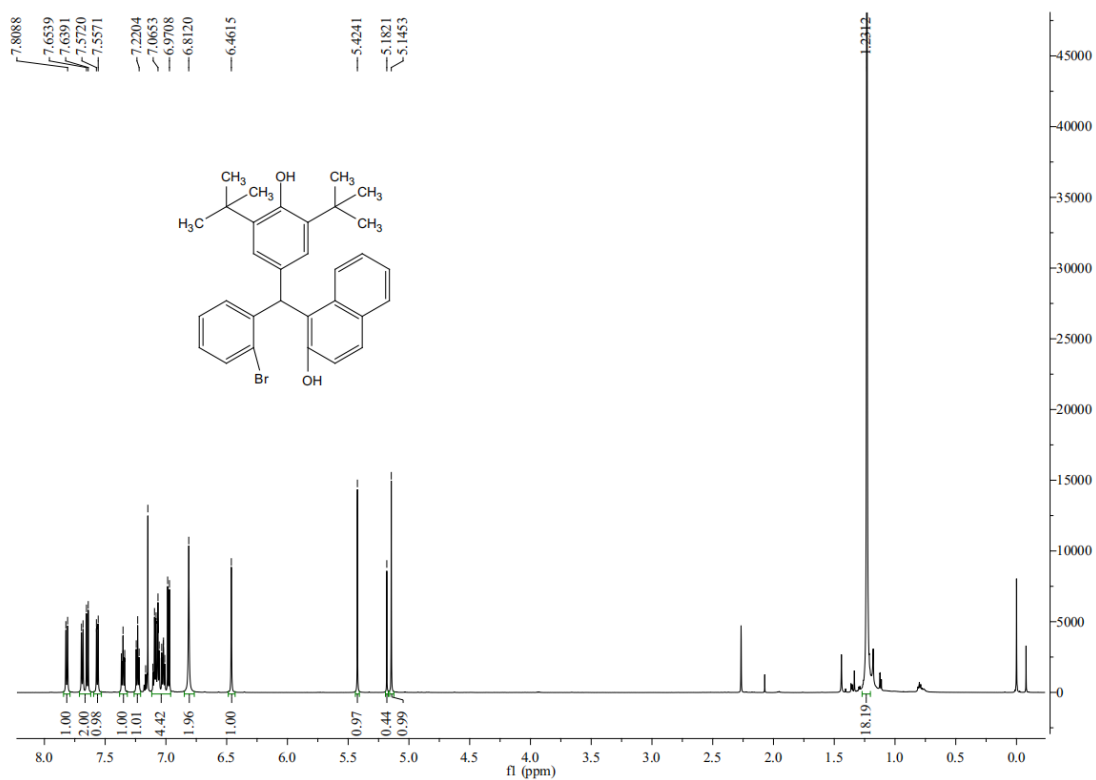

<sup>1</sup>H NMR Spectrum of **1a** (CDCl<sub>3</sub>, 600 MHz)

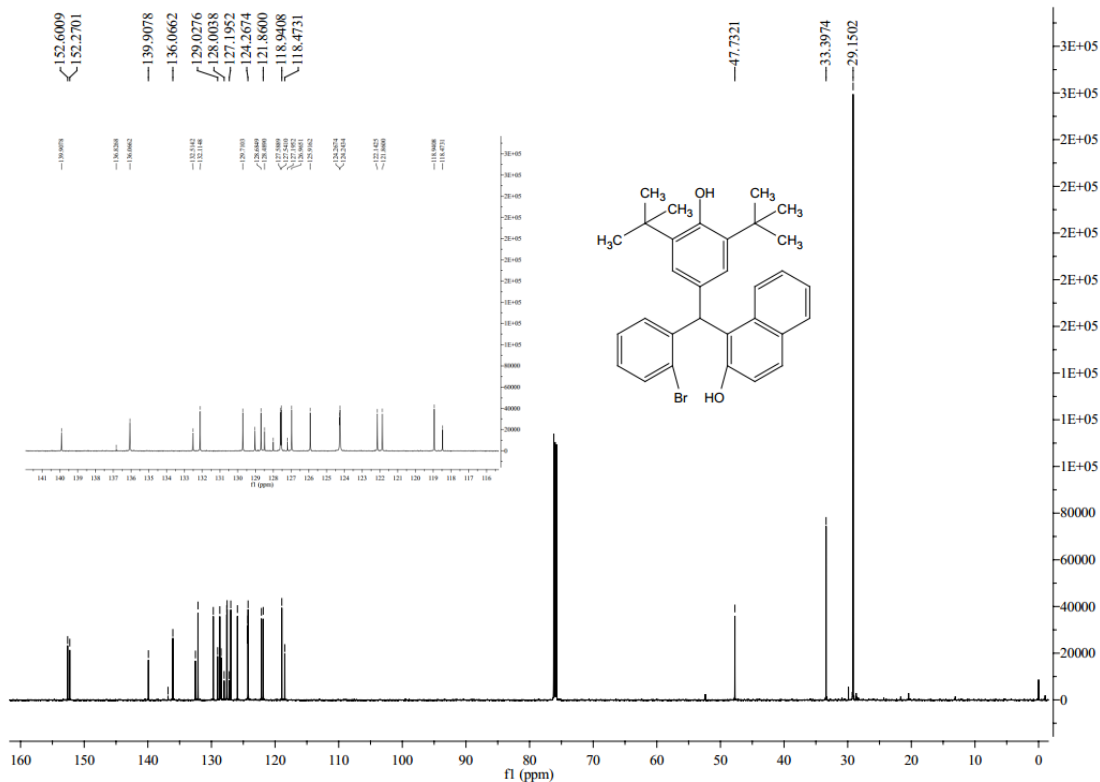

<sup>13</sup>C NMR Spectrum of **1a** (CDCl<sub>3</sub>, 150 MHz)

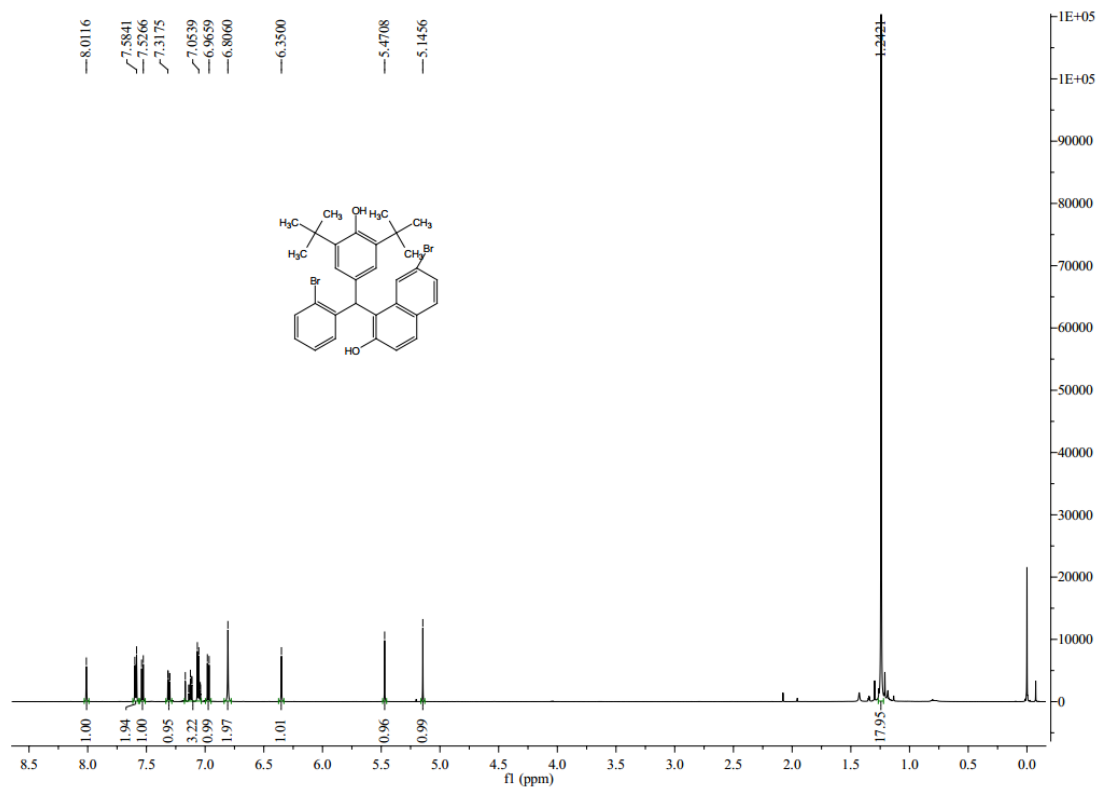

<sup>1</sup>H NMR Spectrum of **1b** (CDCl<sub>3</sub>, 600 MHz)

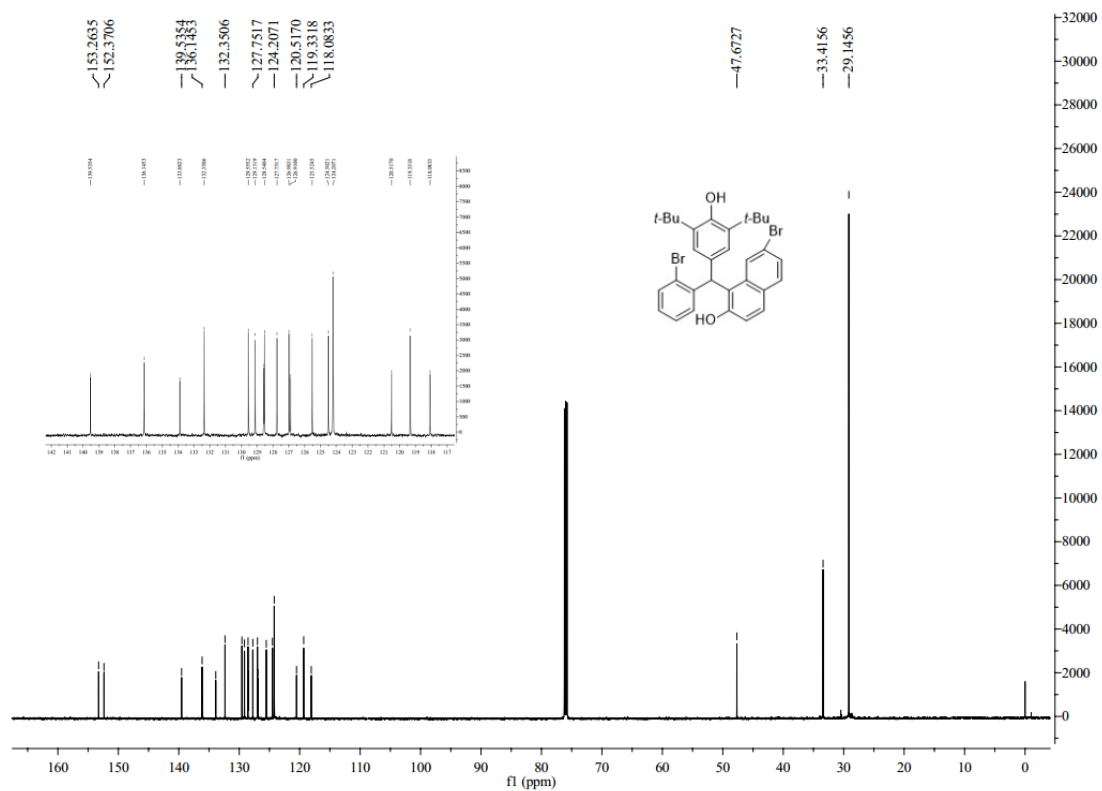

<sup>13</sup>C NMR Spectrum of **1b** (CDCl<sub>3</sub>, 150 MHz)

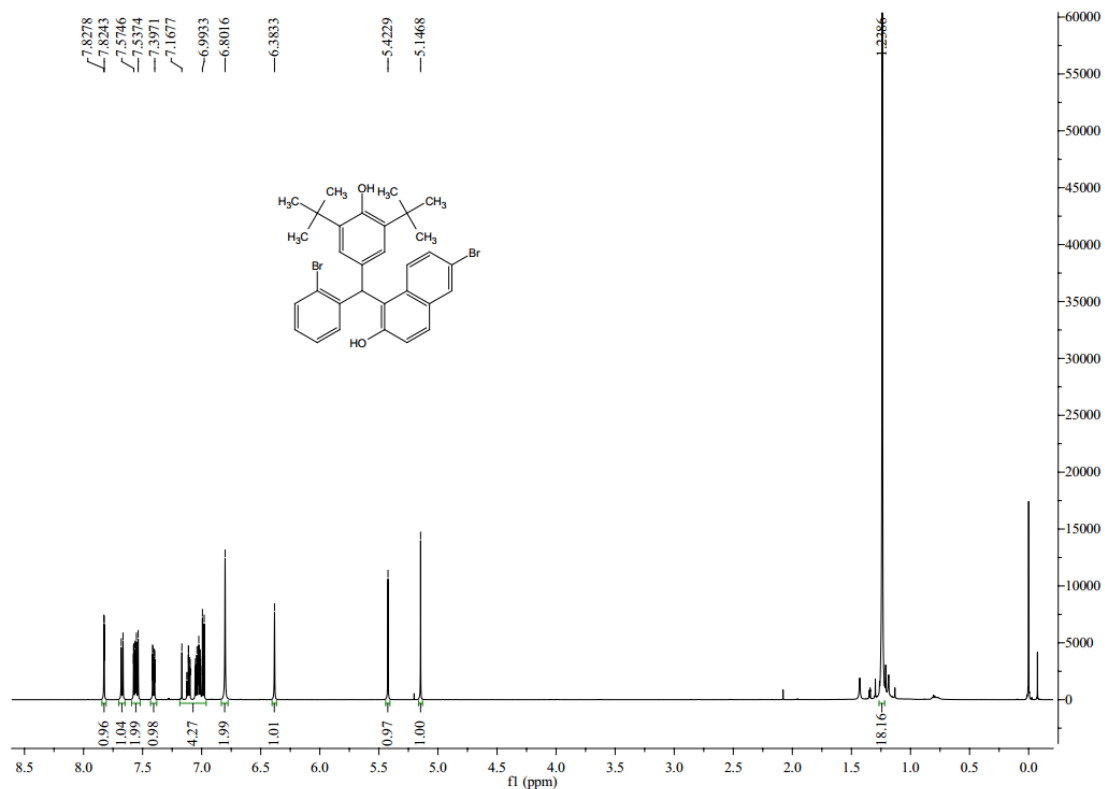

<sup>1</sup>H NMR Spectrum of **1c** (CDCl<sub>3</sub>, 600 MHz)

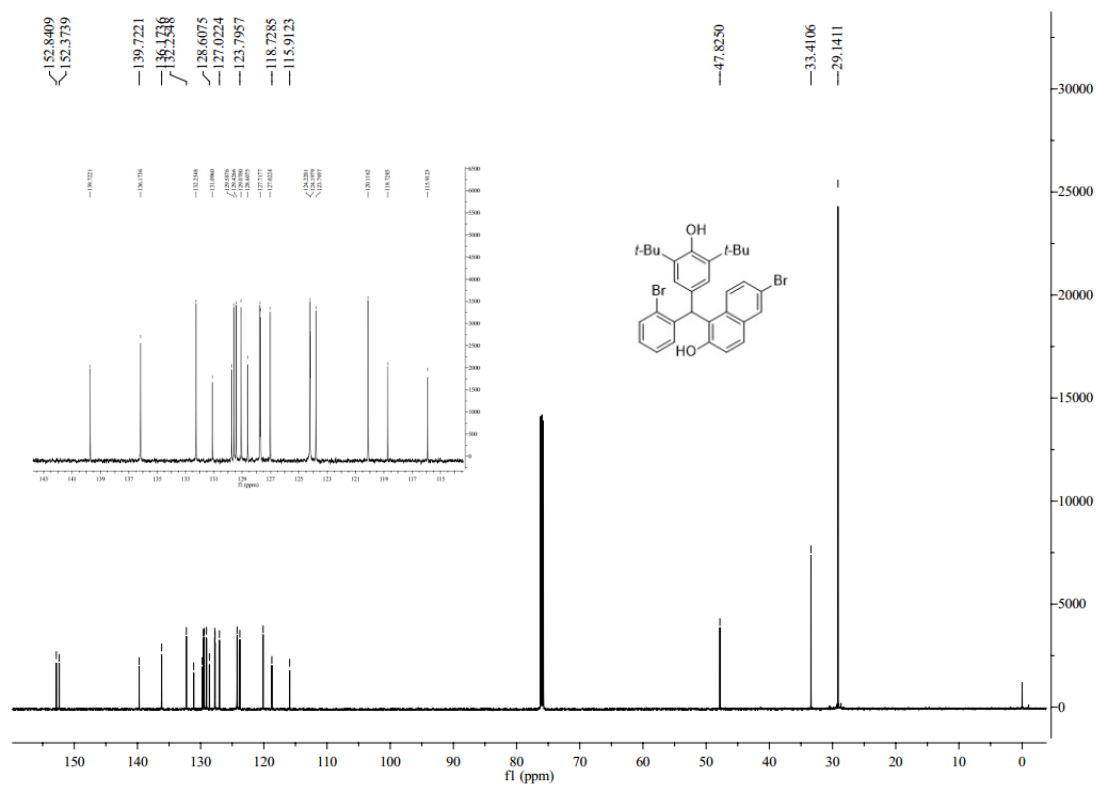

<sup>13</sup>C NMR Spectrum of **1c** (CDCl<sub>3</sub>, 150 MHz)

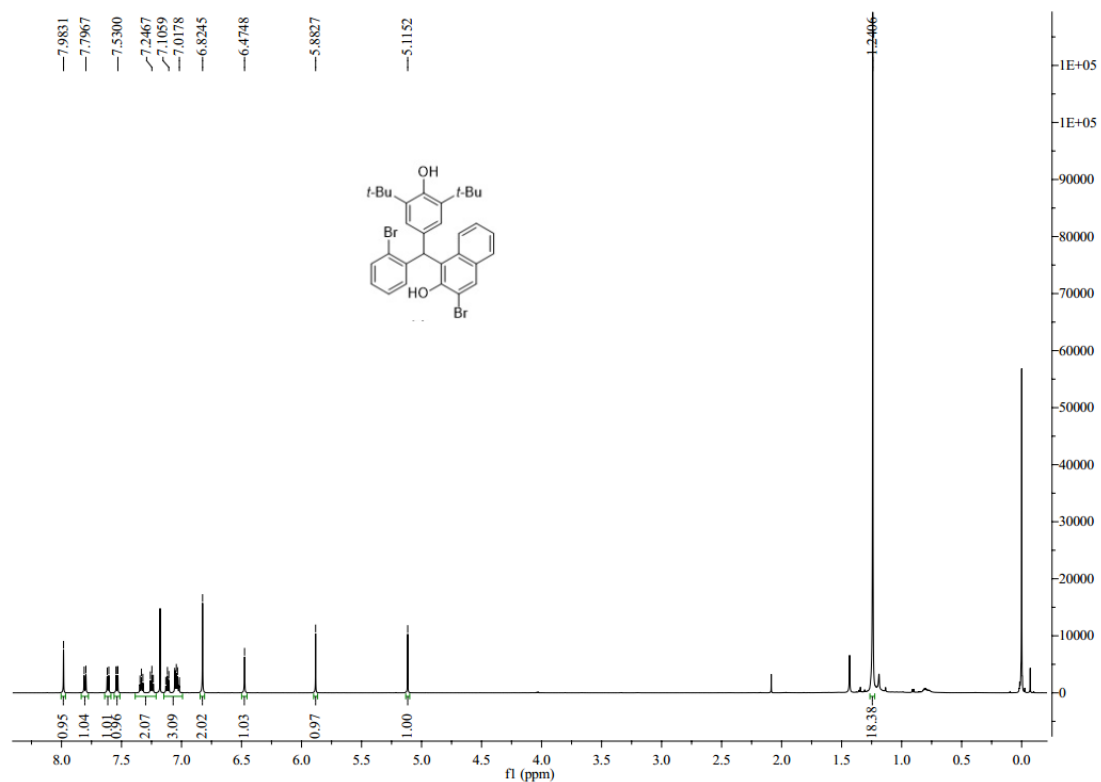

<sup>1</sup>H NMR Spectrum of **1d** (CDCl<sub>3</sub>, 600 MHz)

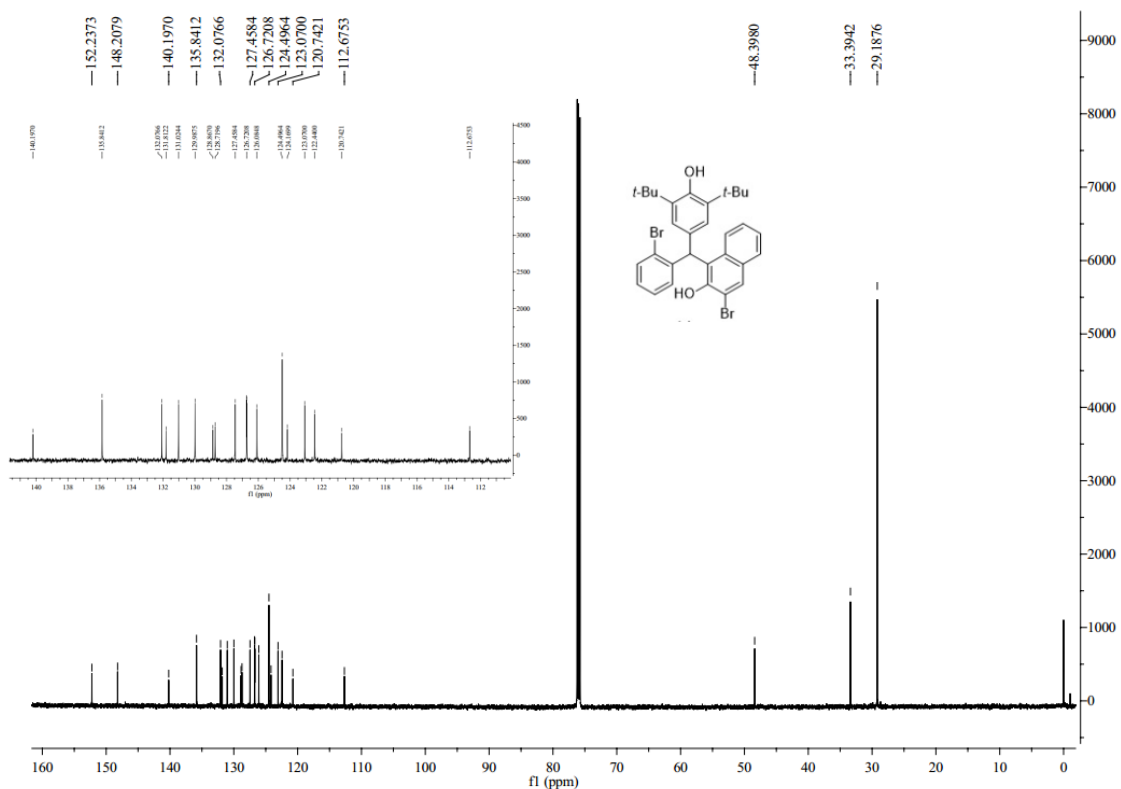

<sup>13</sup>C NMR Spectrum of **1d** (CDCl<sub>3</sub>, 150 MHz)

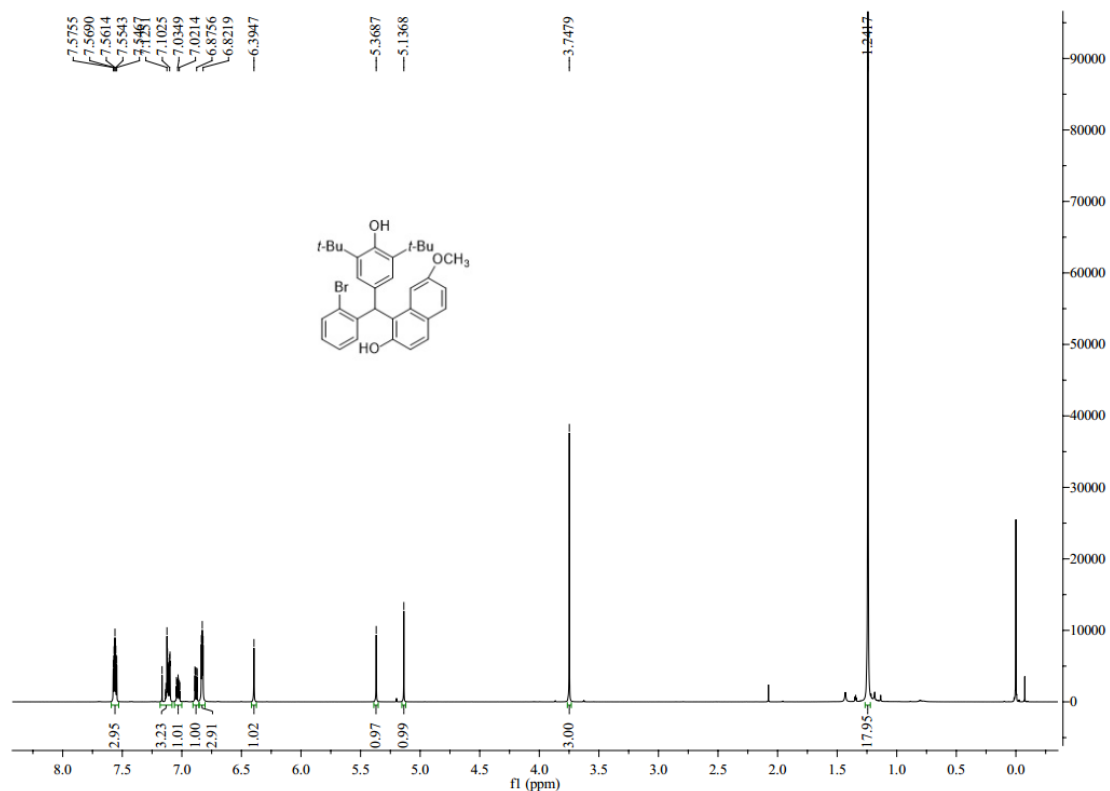

<sup>1</sup>H NMR Spectrum of **1e** (CDCl<sub>3</sub>, 600 MHz)

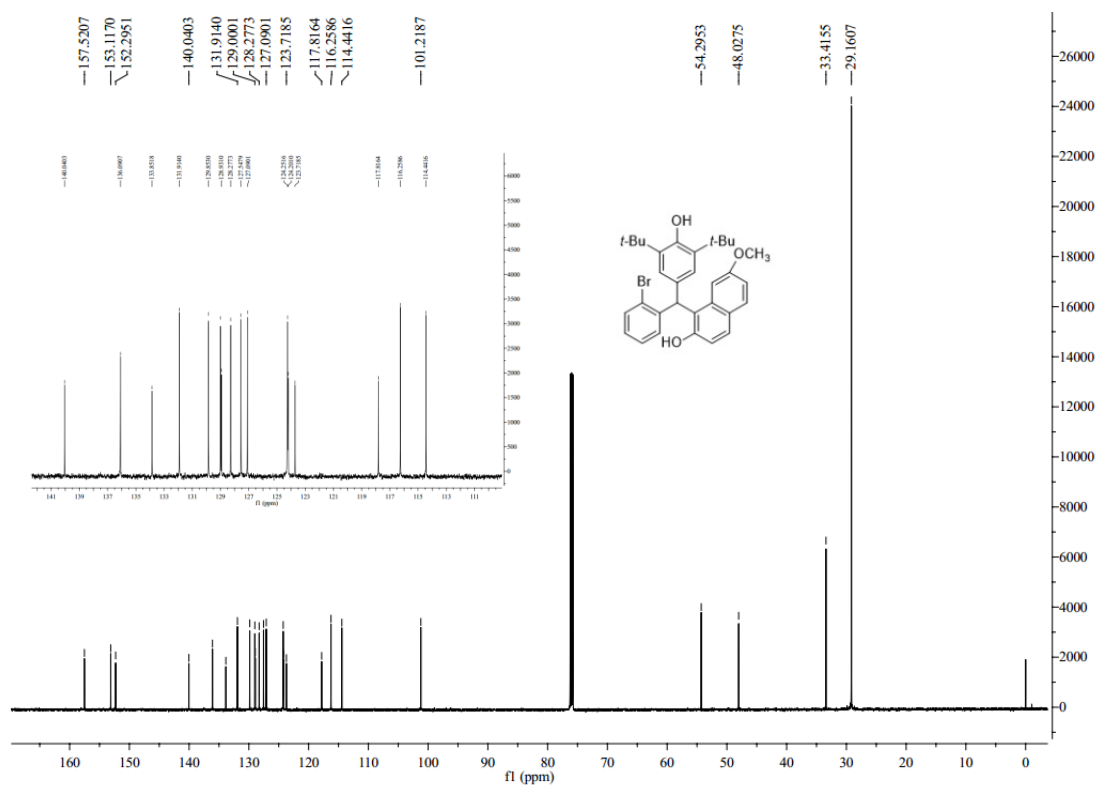

<sup>13</sup>C NMR Spectrum of **1e** (CDCl<sub>3</sub>, 150 MHz)

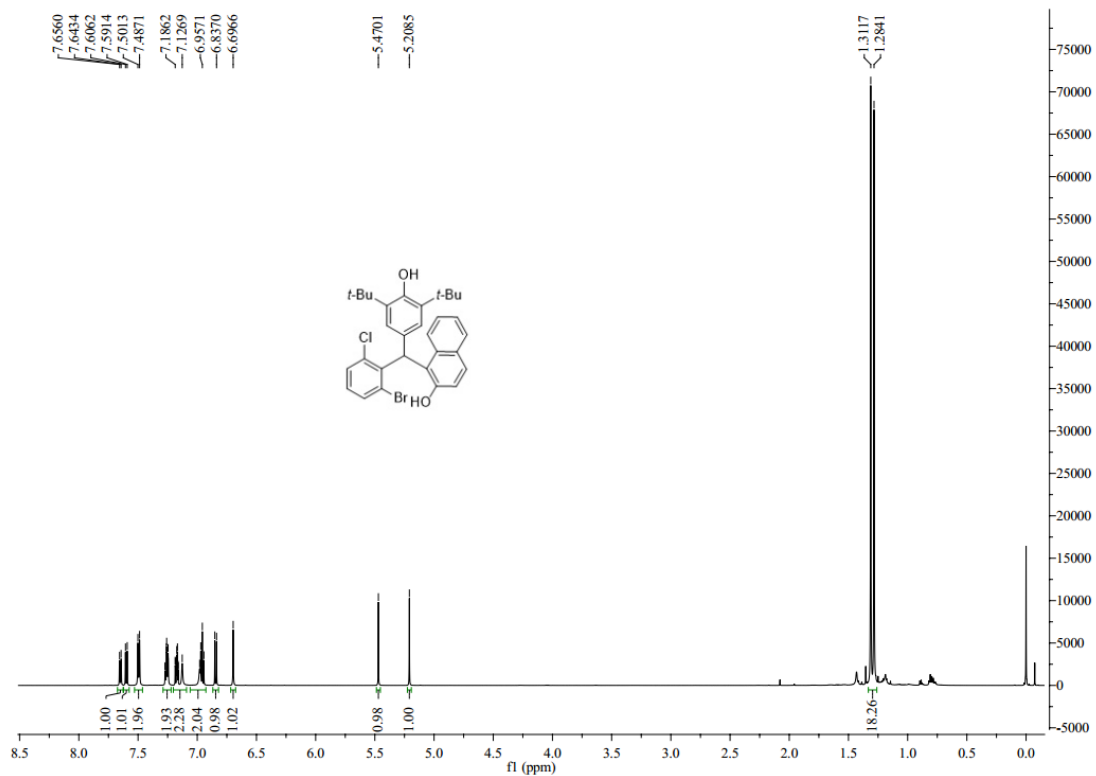

<sup>1</sup>H NMR Spectrum of **1f** (CDCl<sub>3</sub>, 600 MHz)

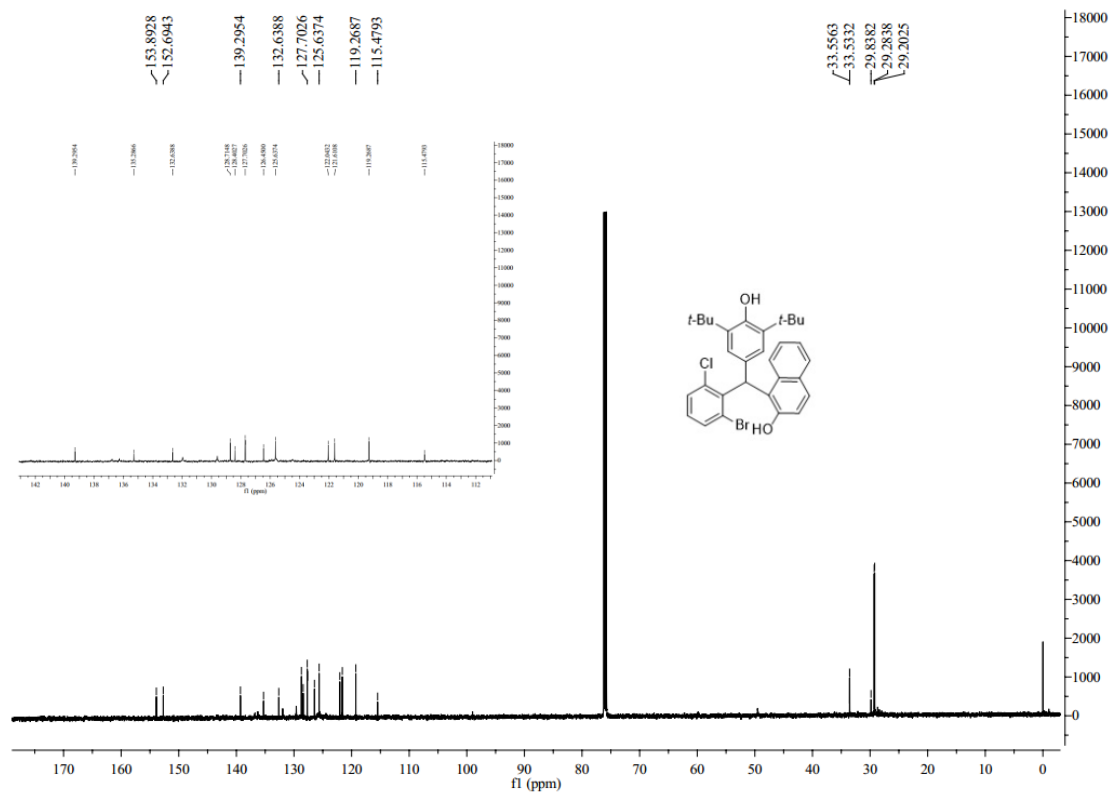

<sup>13</sup>C NMR Spectrum of **1f** (CDCl<sub>3</sub>, 150 MHz)

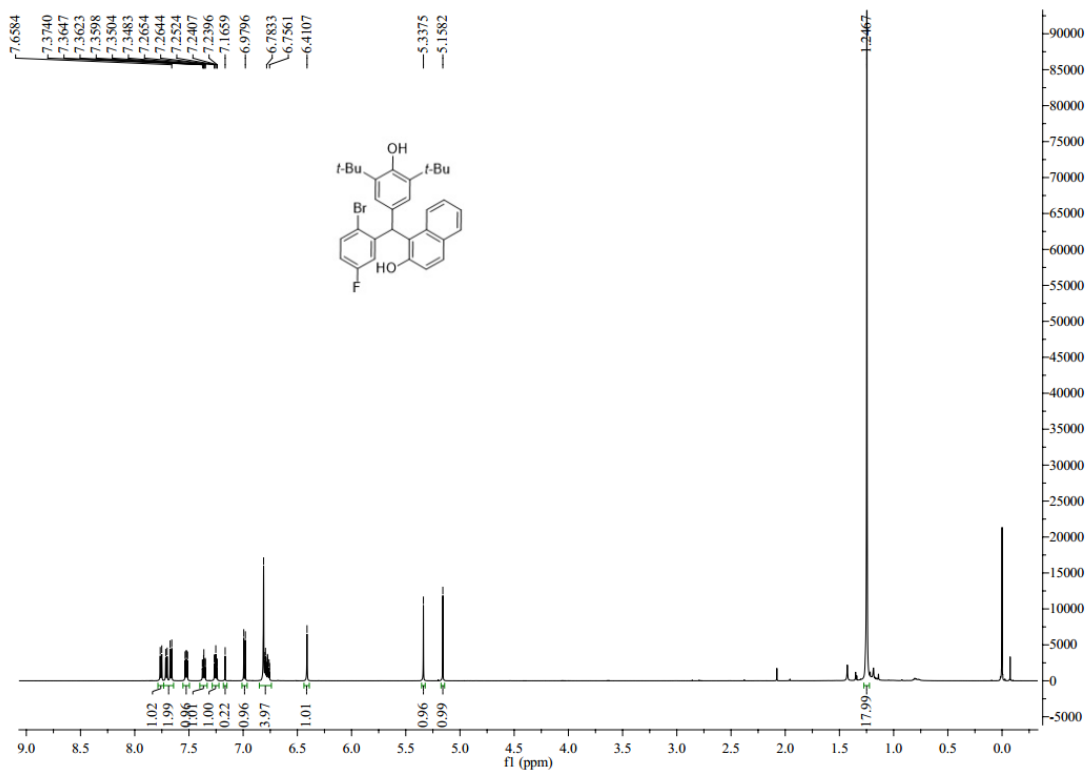

**<sup>1</sup>H NMR Spectrum of **1g** (CDCl<sub>3</sub>, 600 MHz)**

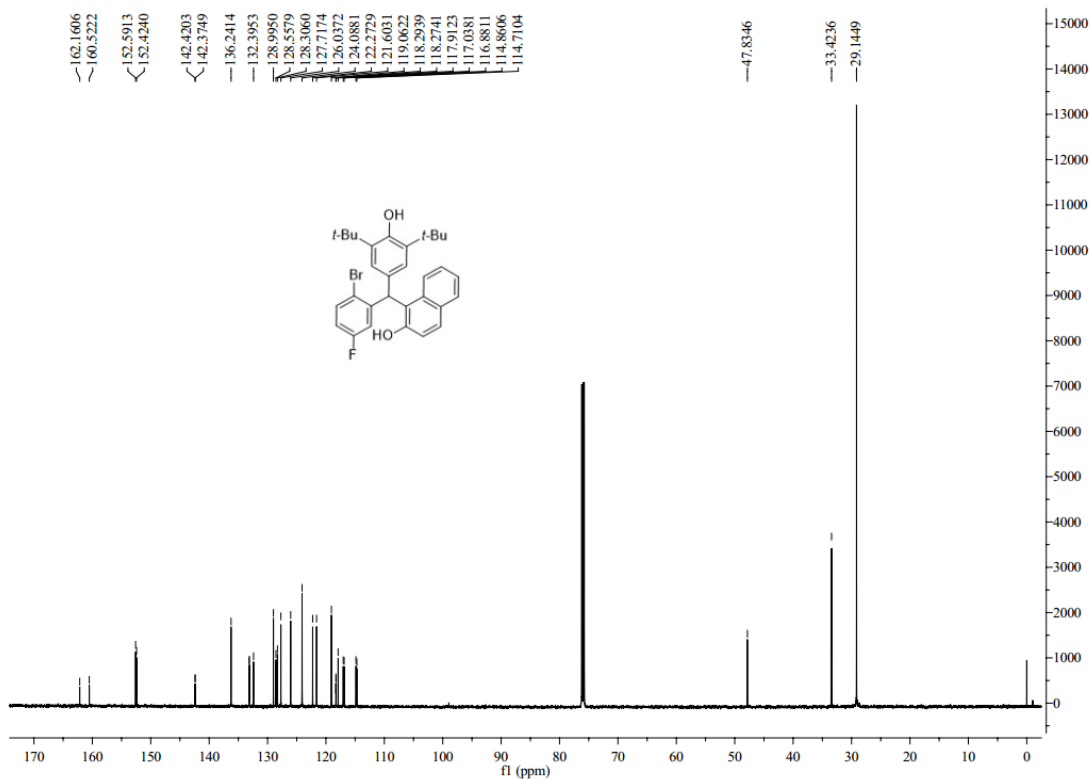

**<sup>13</sup>C NMR Spectrum of **1g** (CDCl<sub>3</sub>, 150 MHz)**



$^{19}\text{F}$  NMR (377 MHz,  $\text{CDCl}_3$ )  $\delta = -113.34$ .

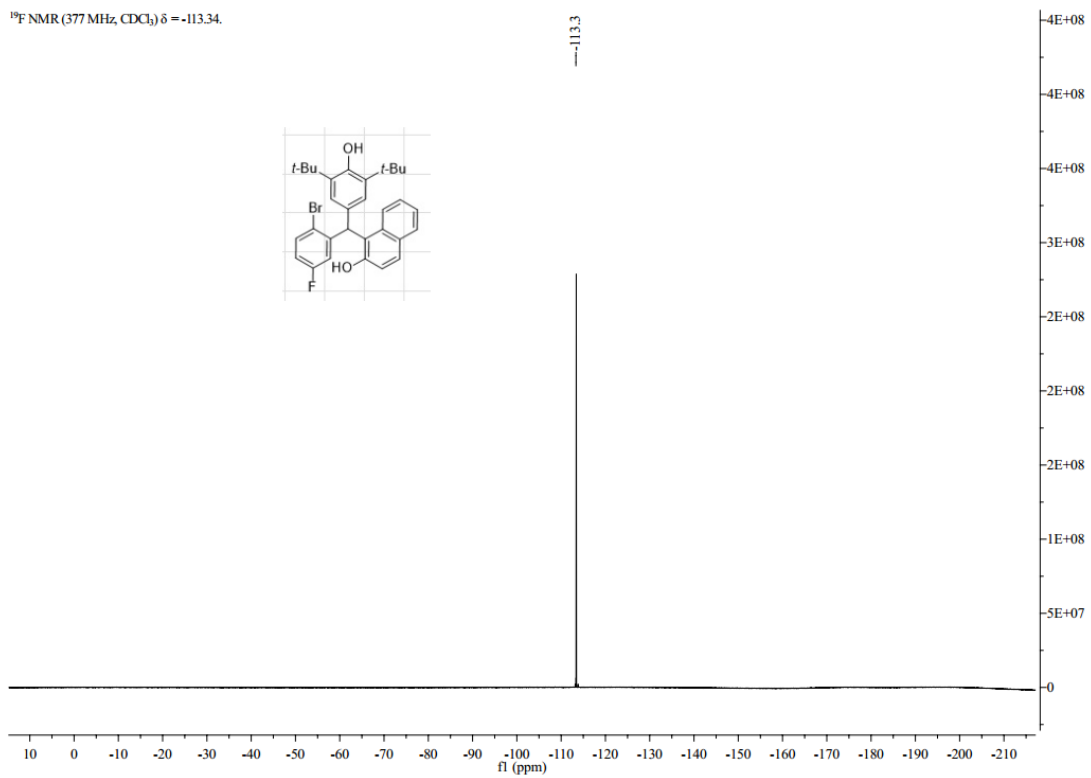

$^{19}\text{F}$  NMR Spectrum of **1g** ( $\text{CDCl}_3$ , 377 MHz)

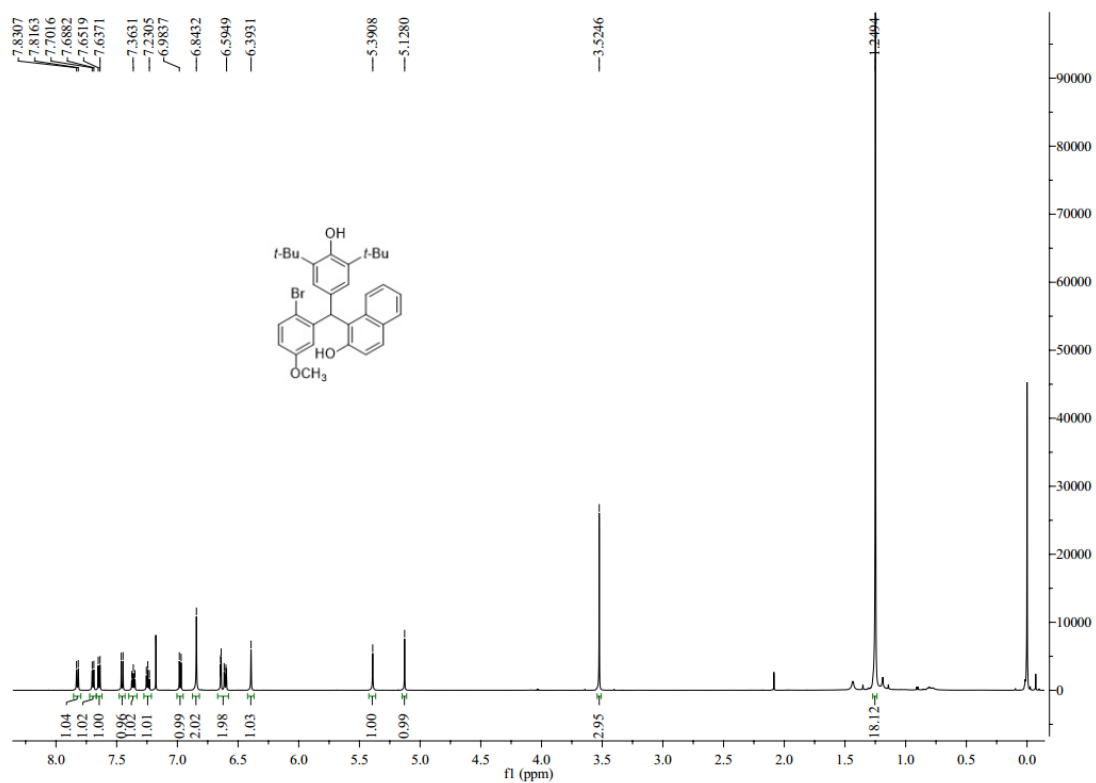

**<sup>1</sup>H NMR Spectrum of **1h** (CDCl<sub>3</sub>, 600 MHz)**

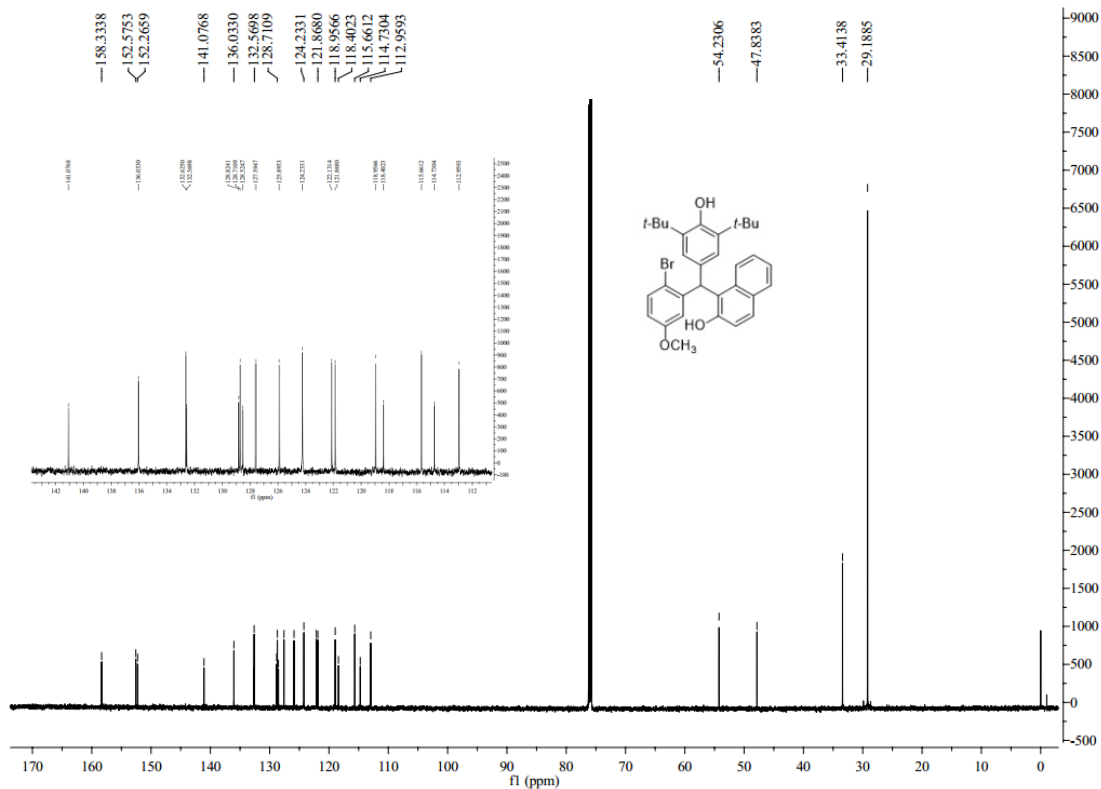

**<sup>13</sup>C NMR Spectrum of **1h** (CDCl<sub>3</sub>, 150 MHz)**

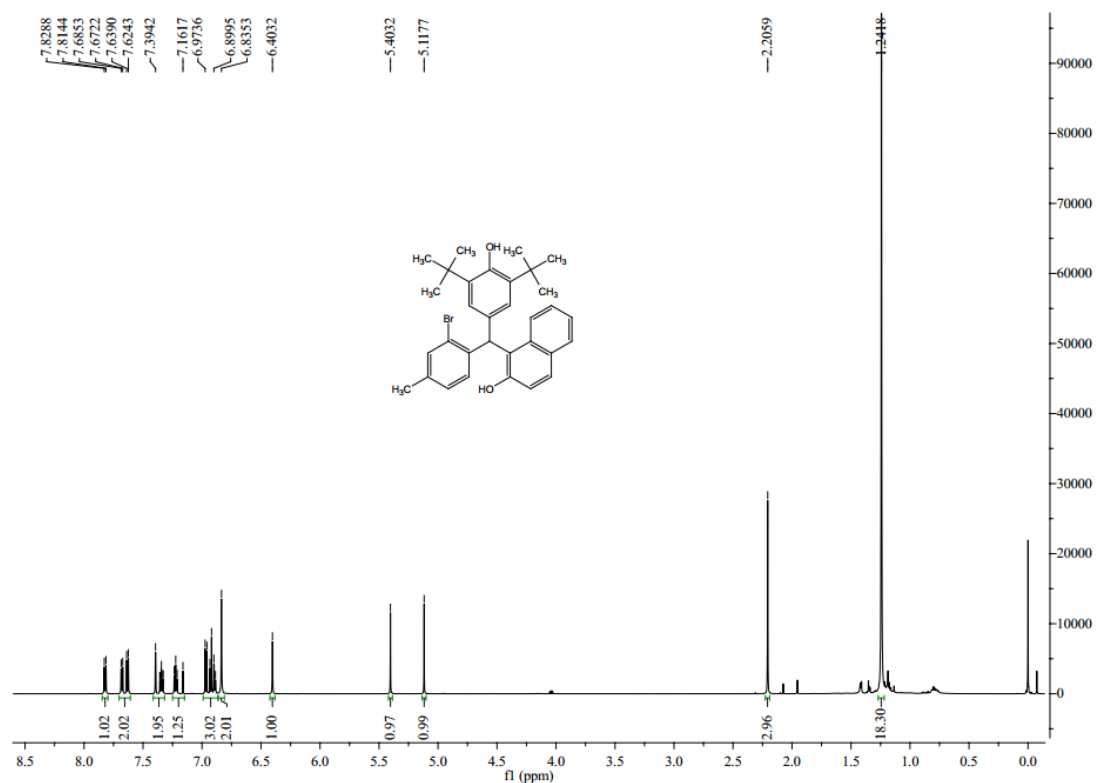

<sup>1</sup>H NMR Spectrum of **1i** (CDCl<sub>3</sub>, 600 MHz)

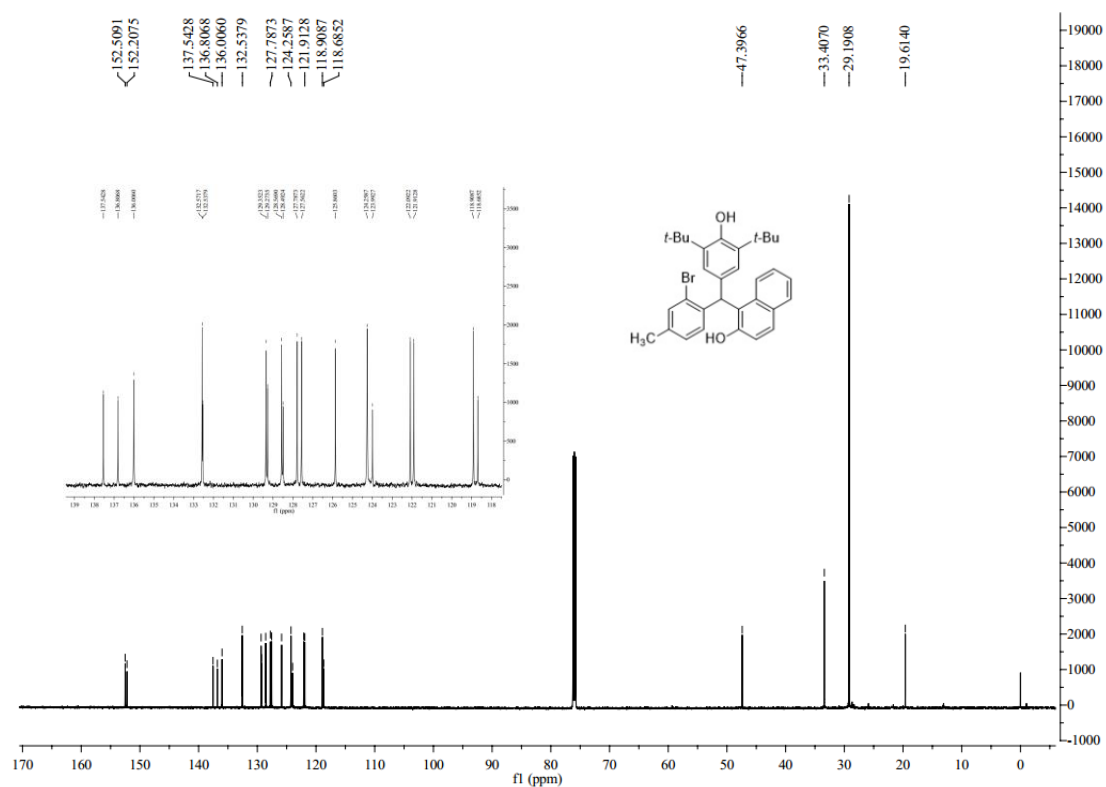

<sup>13</sup>C NMR Spectrum of **1i** (CDCl<sub>3</sub>, 150 MHz)

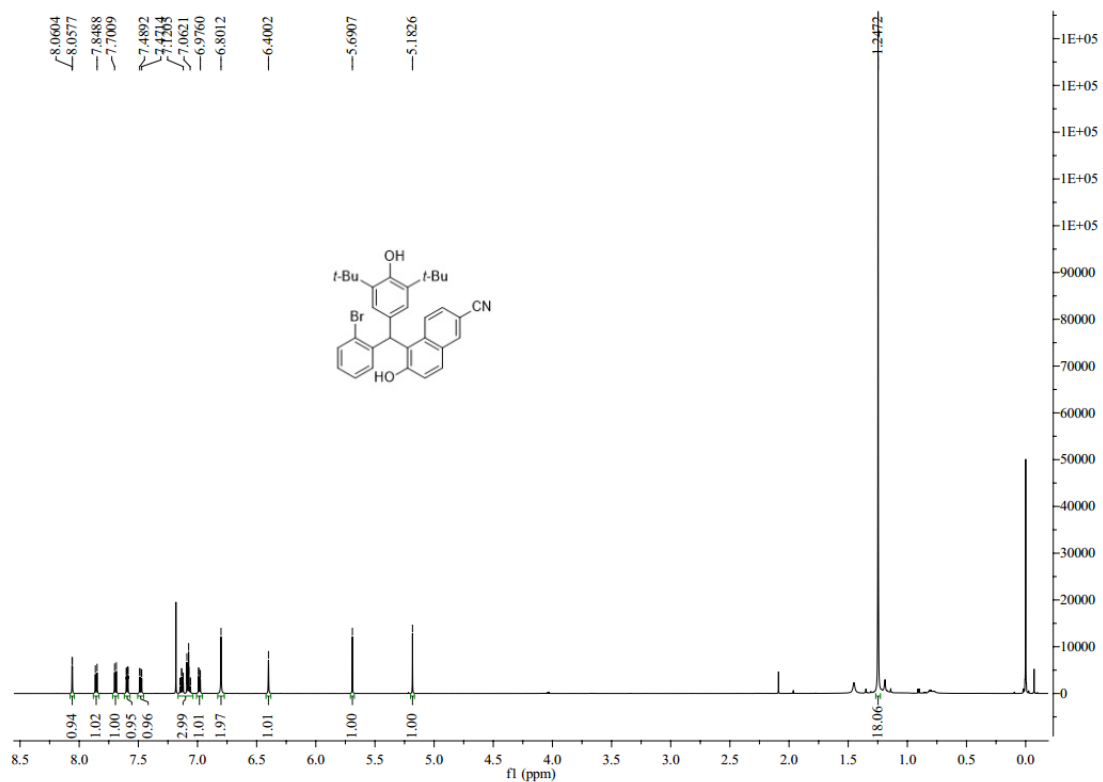

<sup>1</sup>H NMR Spectrum of **1j** (CDCl<sub>3</sub>, 600 MHz)

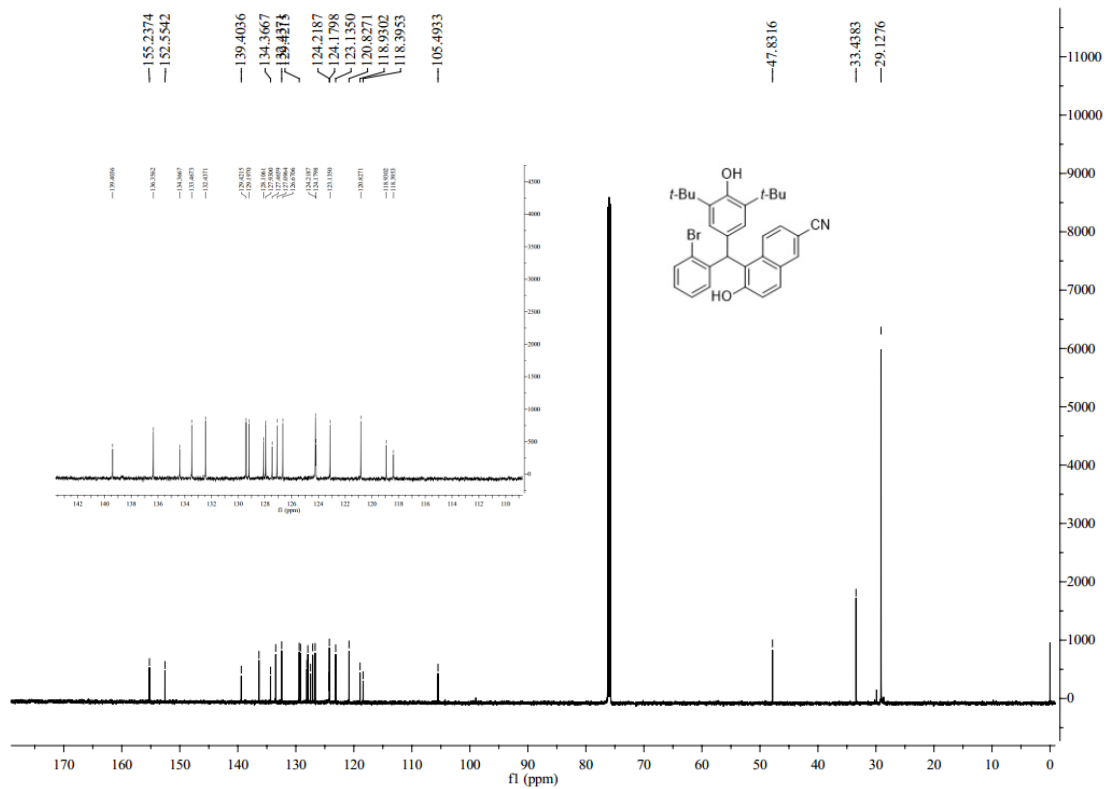

<sup>13</sup>C NMR Spectrum of **1j** (CDCl<sub>3</sub>, 150 MHz)

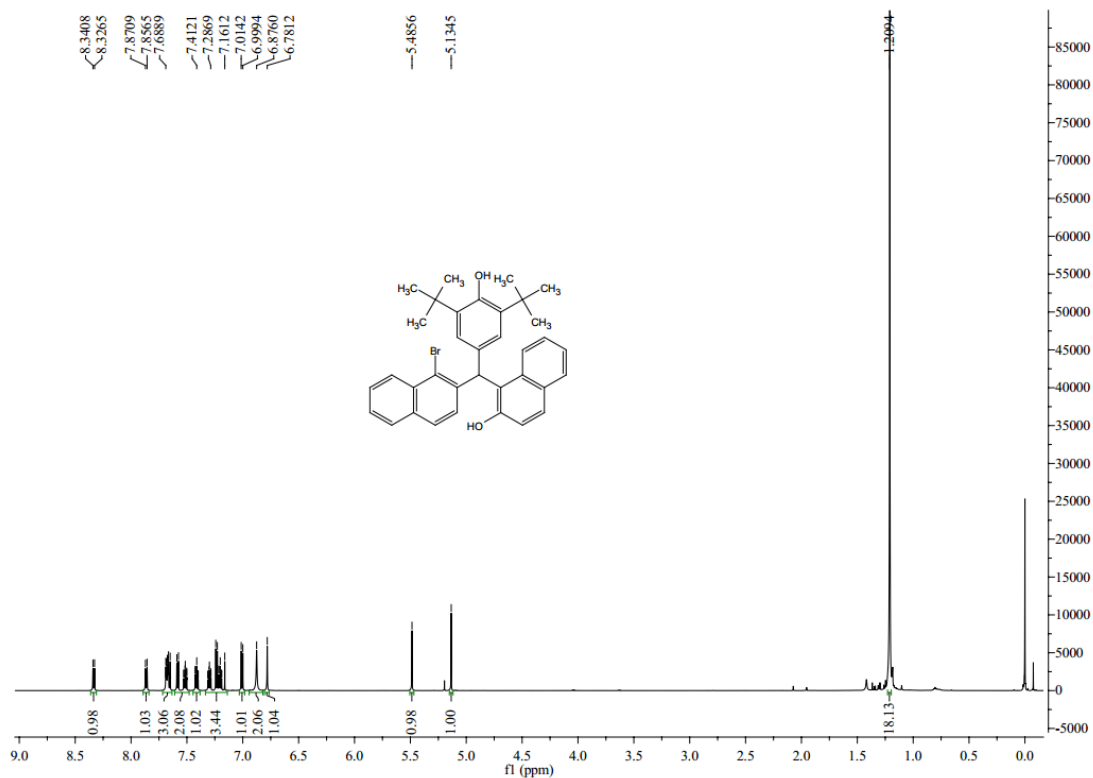

$^1\text{H}$  NMR Spectrum of **1k** ( $\text{CDCl}_3$ , 600 MHz)

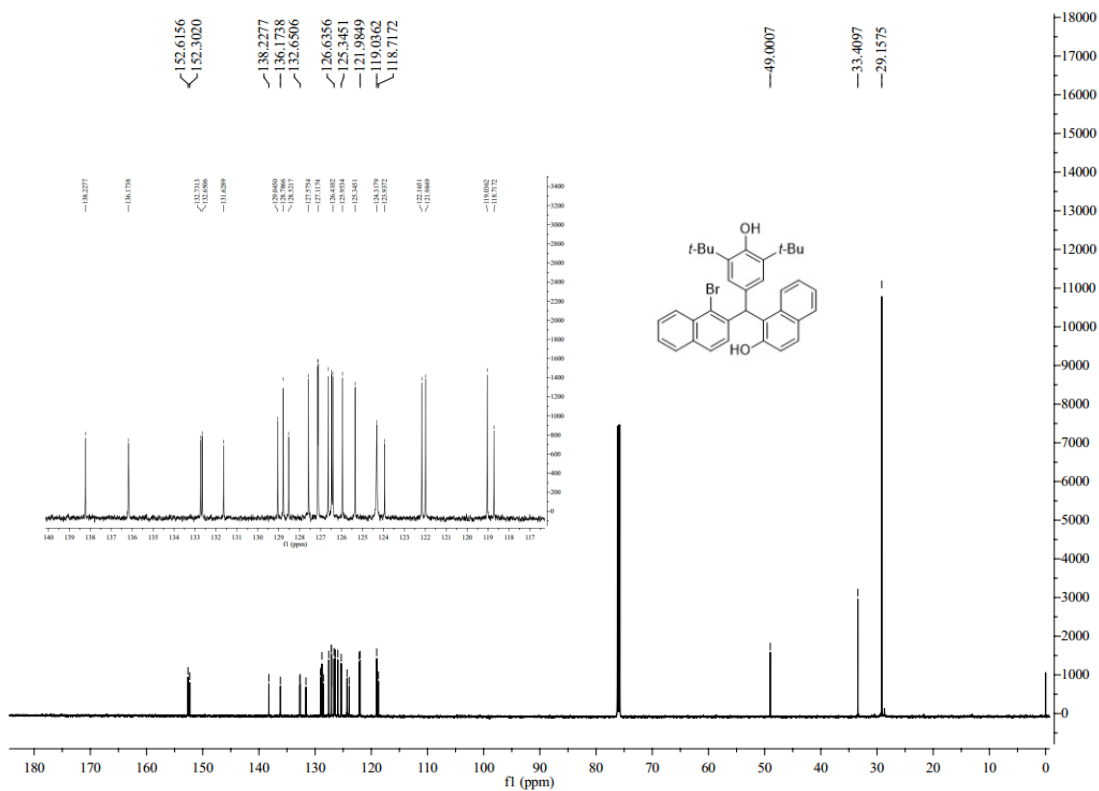

$^{13}\text{C}$  NMR Spectrum of **1k** ( $\text{CDCl}_3$ , 150 MHz)

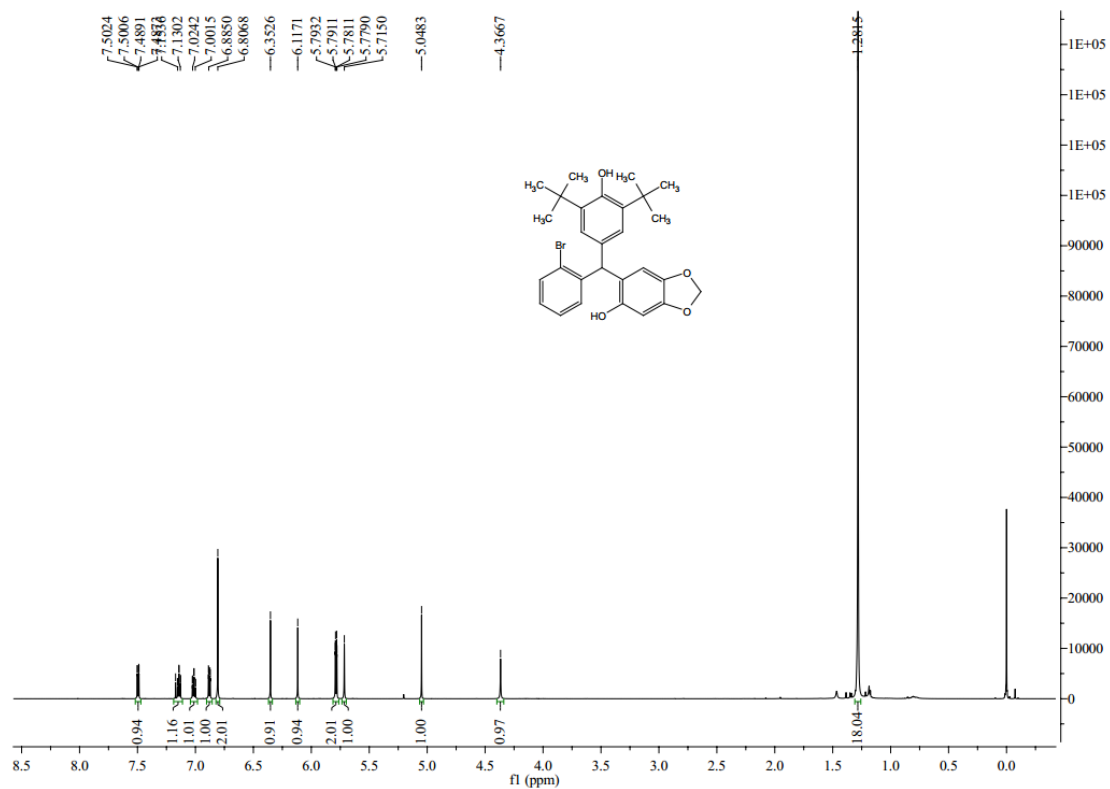

<sup>1</sup>H NMR Spectrum of **11** (CDCl<sub>3</sub>, 600 MHz)

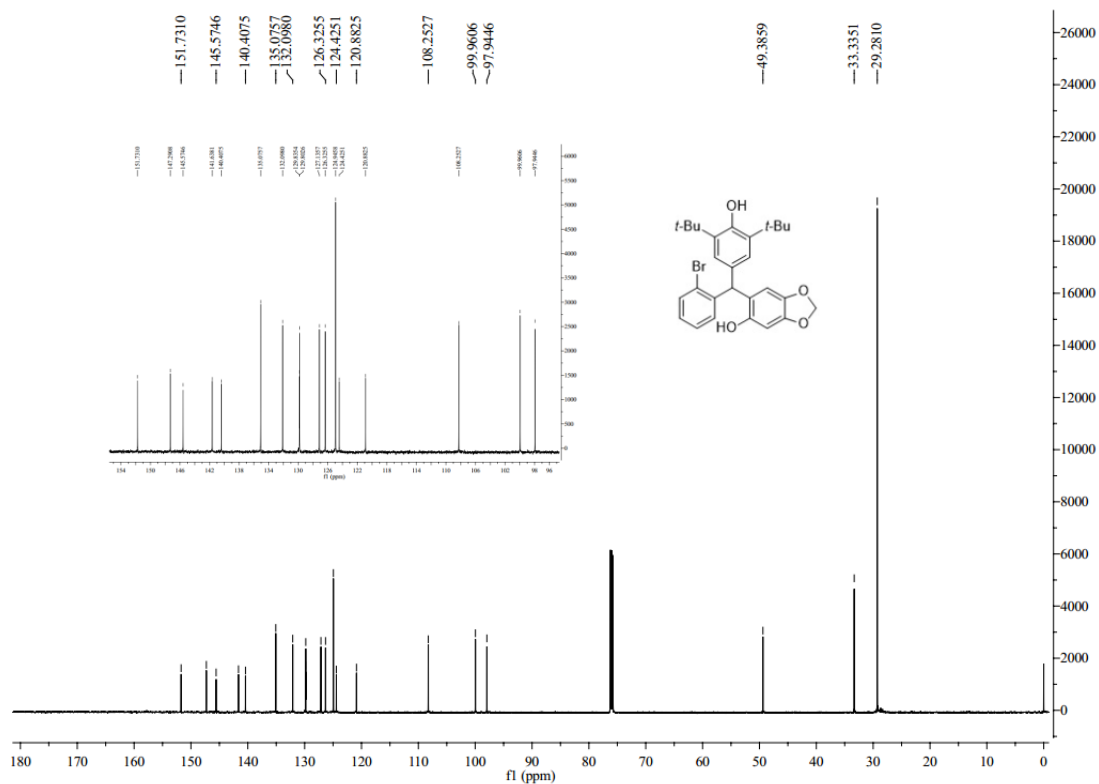

<sup>13</sup>C NMR Spectrum of **11** (CDCl<sub>3</sub>, 150 MHz)

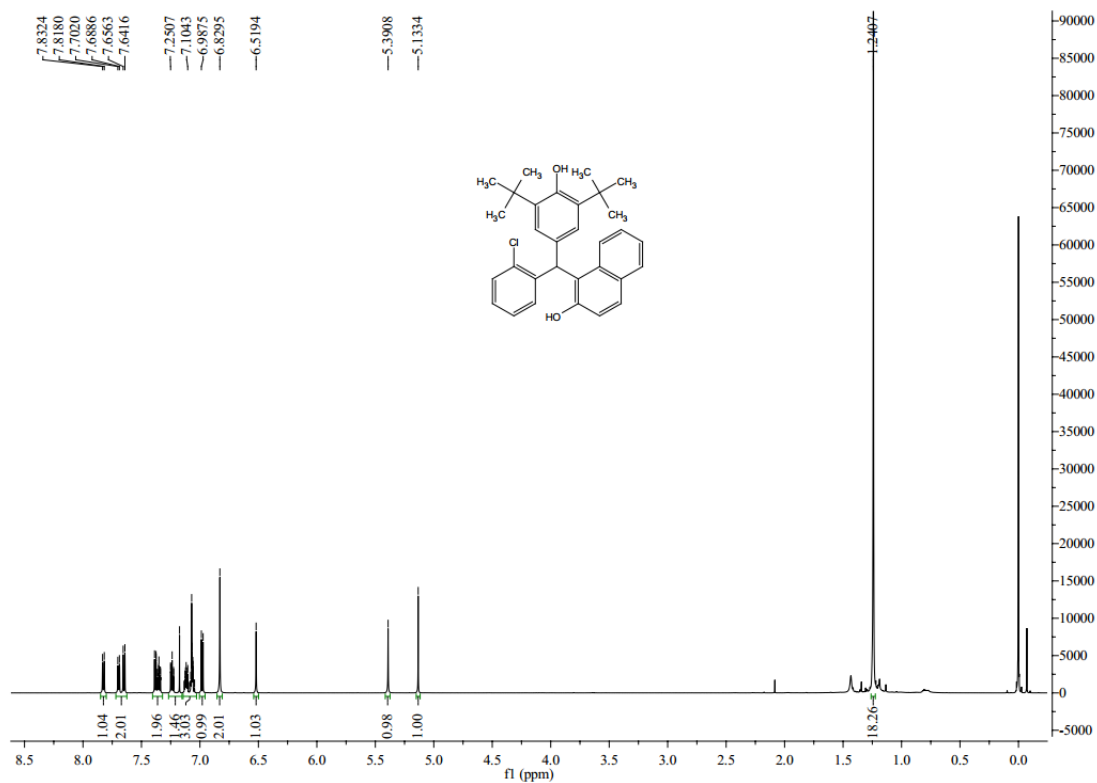

<sup>1</sup>H NMR Spectrum of **1m** (CDCl<sub>3</sub>, 600 MHz)

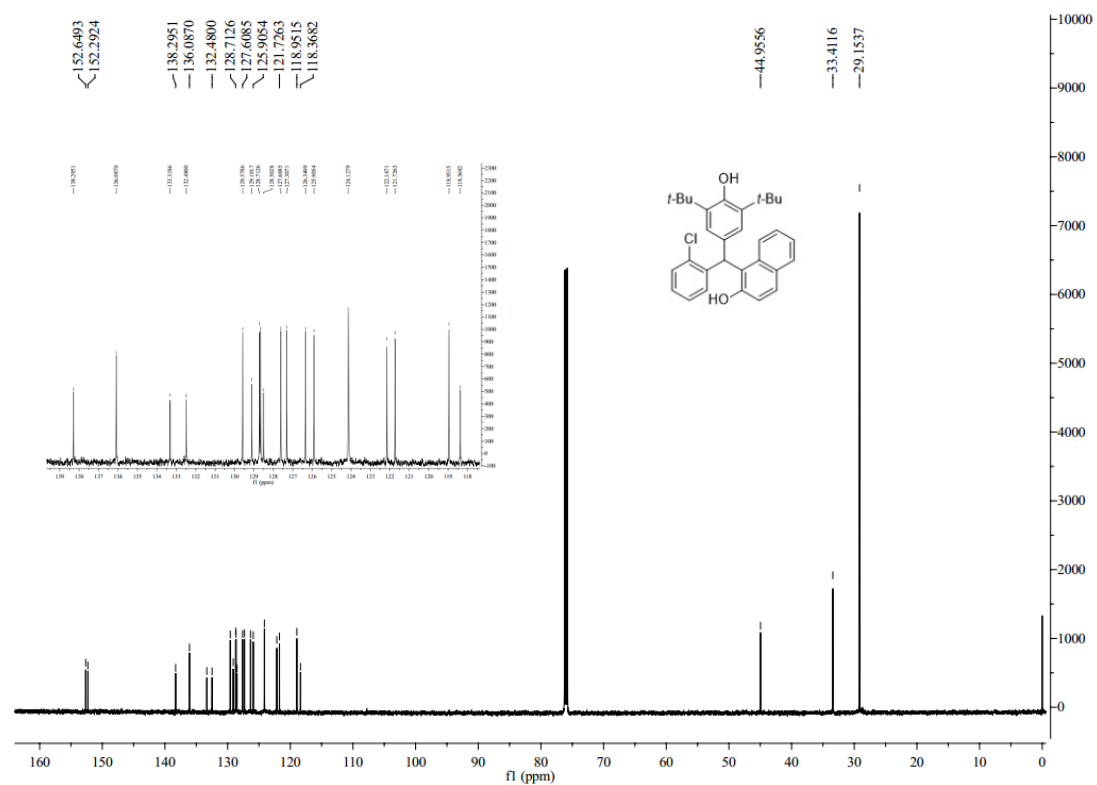

<sup>13</sup>C NMR Spectrum of **1m** (CDCl<sub>3</sub>, 150 MHz)

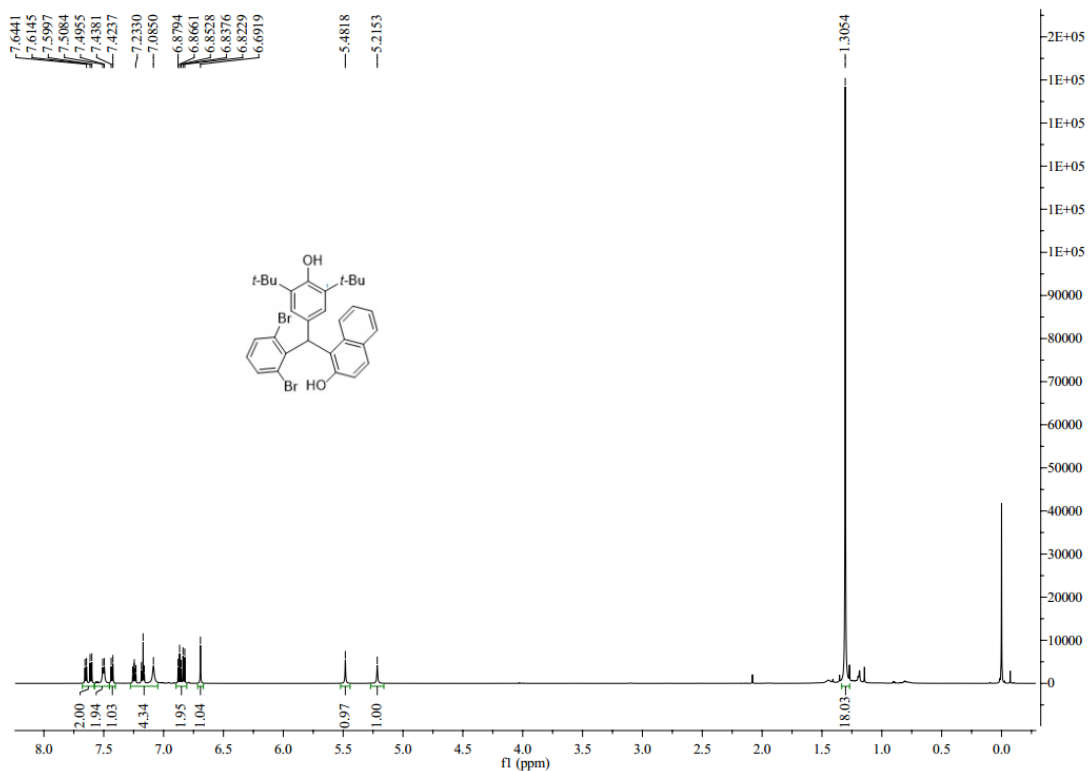

**<sup>1</sup>H NMR Spectrum of 1n (CDCl<sub>3</sub>, 600 MHz)**

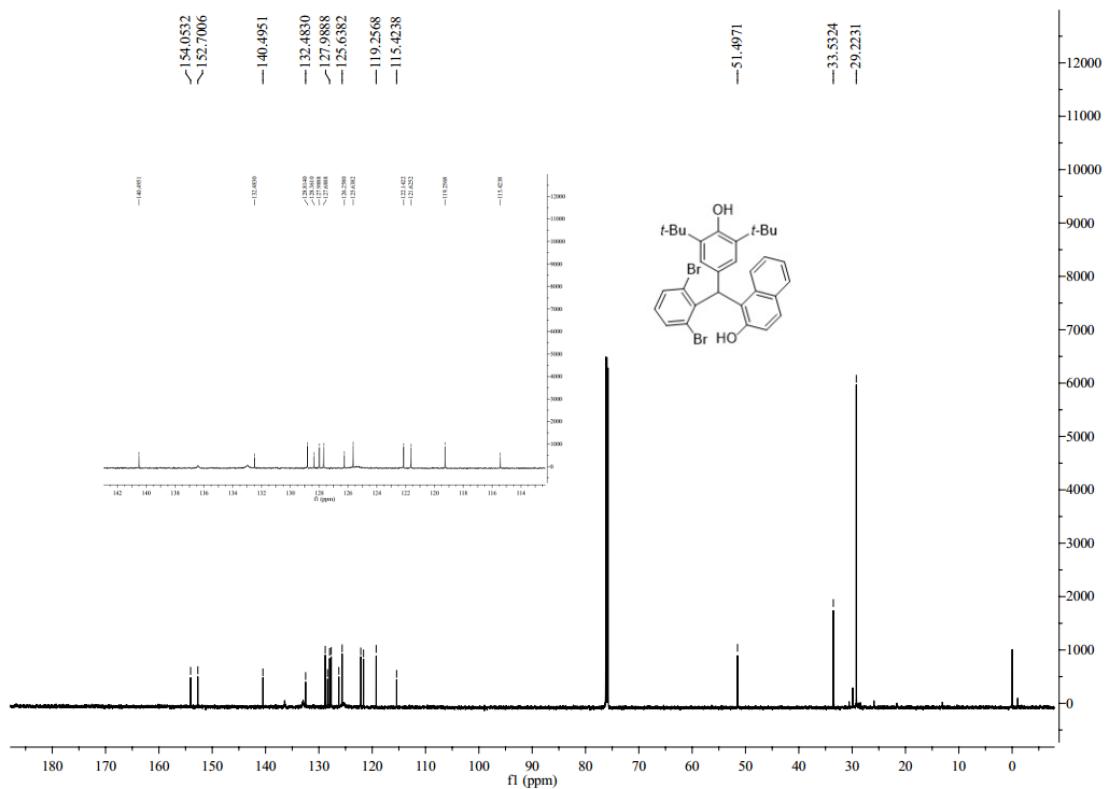

**<sup>13</sup>C NMR Spectrum of 1n (CDCl<sub>3</sub>, 150 MHz)**



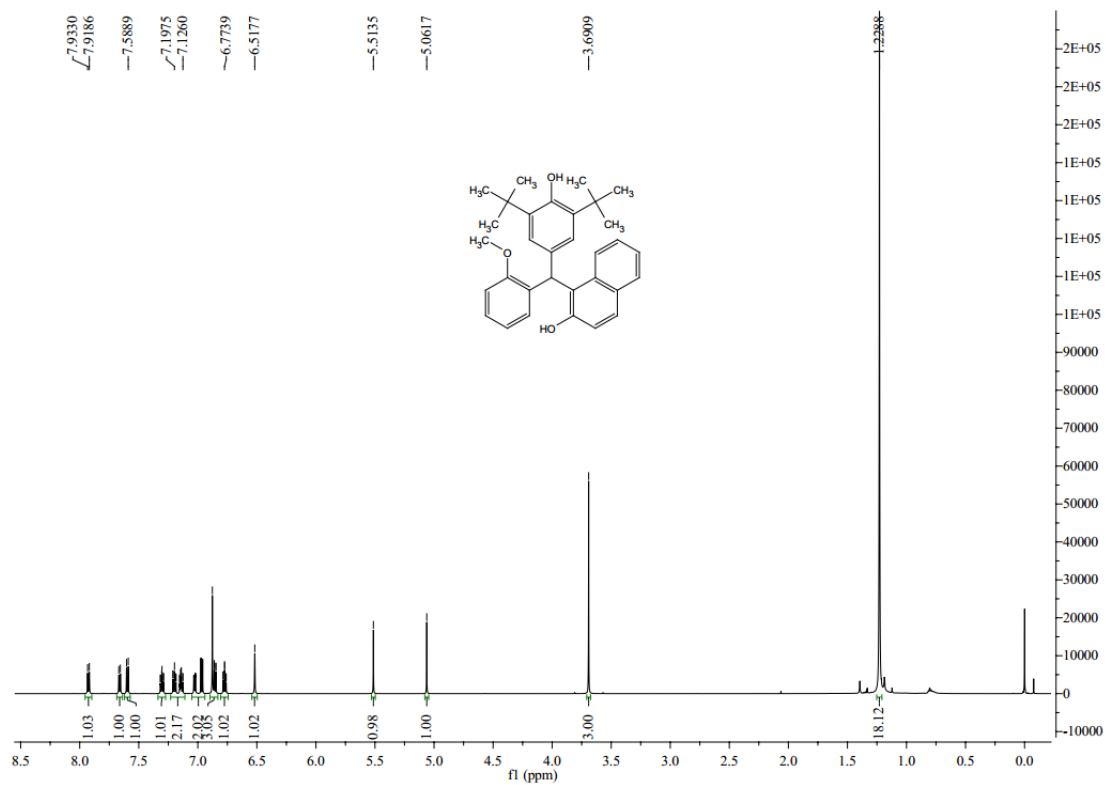

<sup>1</sup>H NMR Spectrum of **1o** (CDCl<sub>3</sub>, 600 MHz)

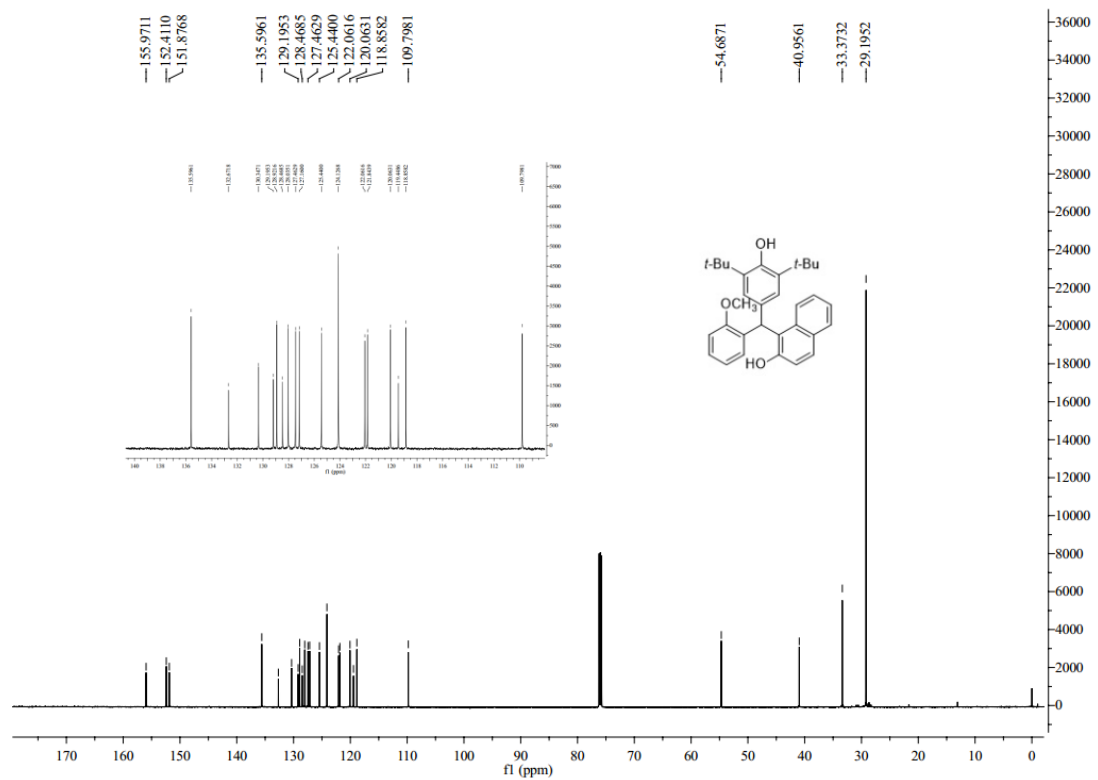

<sup>13</sup>C NMR Spectrum of **1o** (CDCl<sub>3</sub>, 150 MHz)



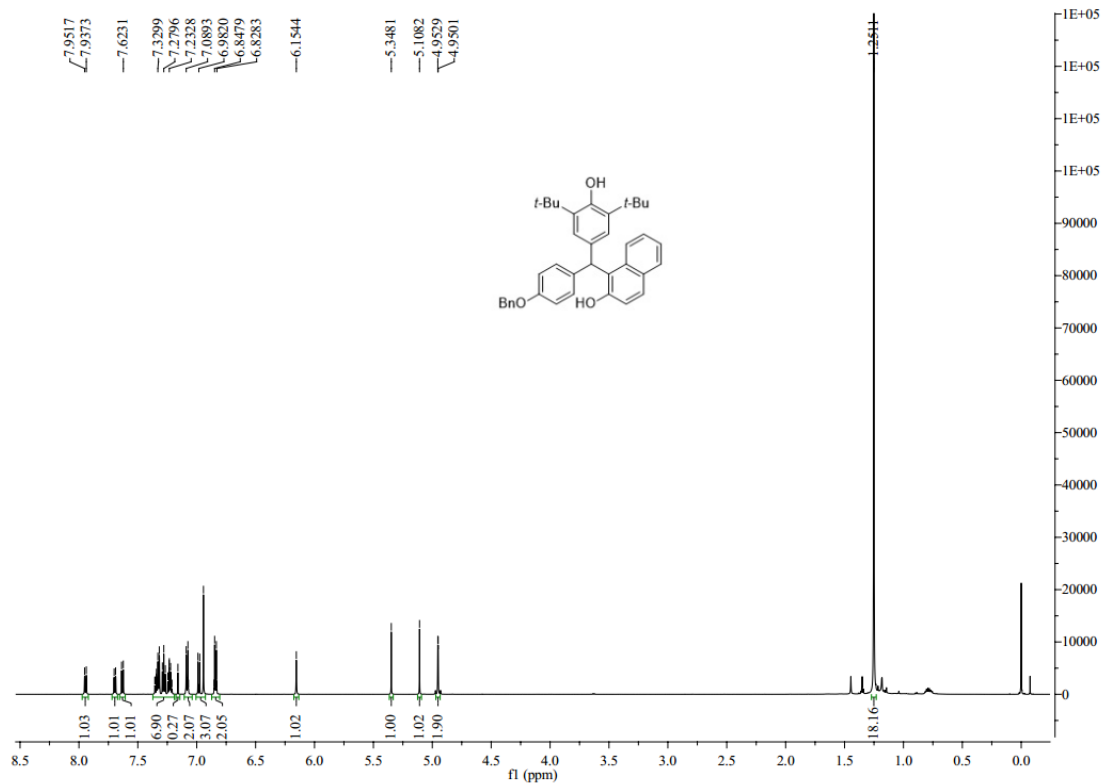

<sup>1</sup>H NMR Spectrum of **1q** (CDCl<sub>3</sub>, 600 MHz)

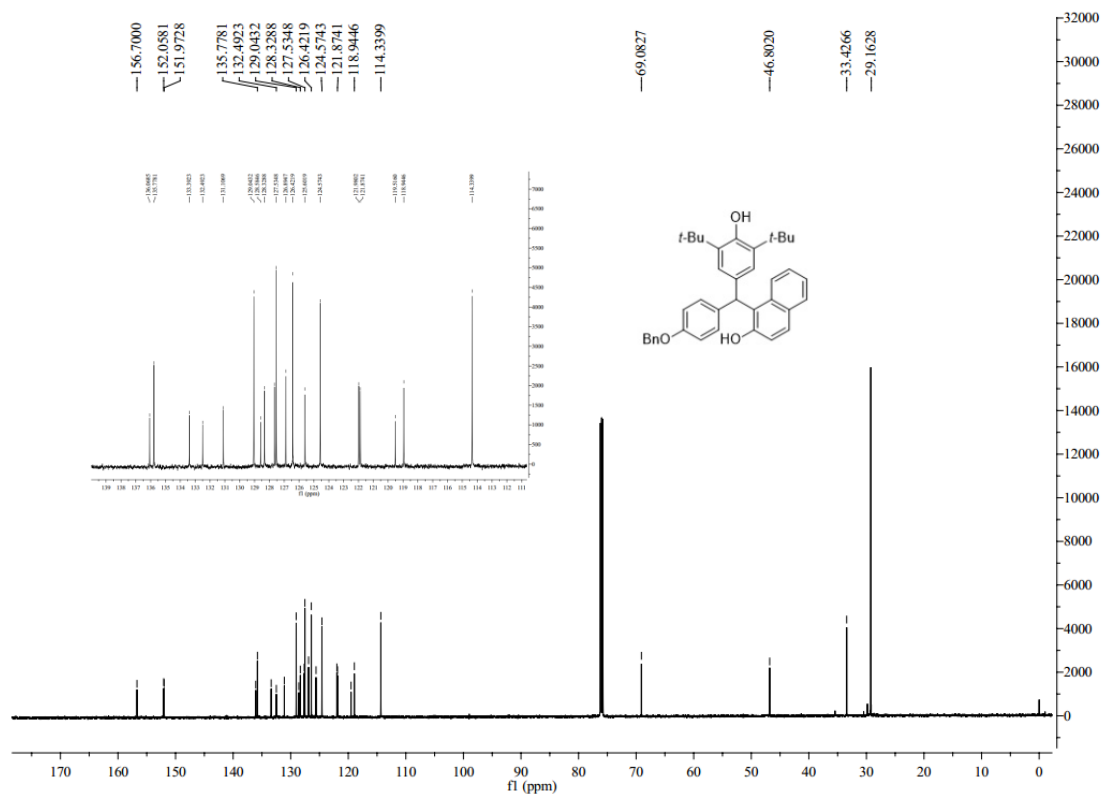

<sup>13</sup>C NMR Spectrum of **1q** (CDCl<sub>3</sub>, 150 MHz)

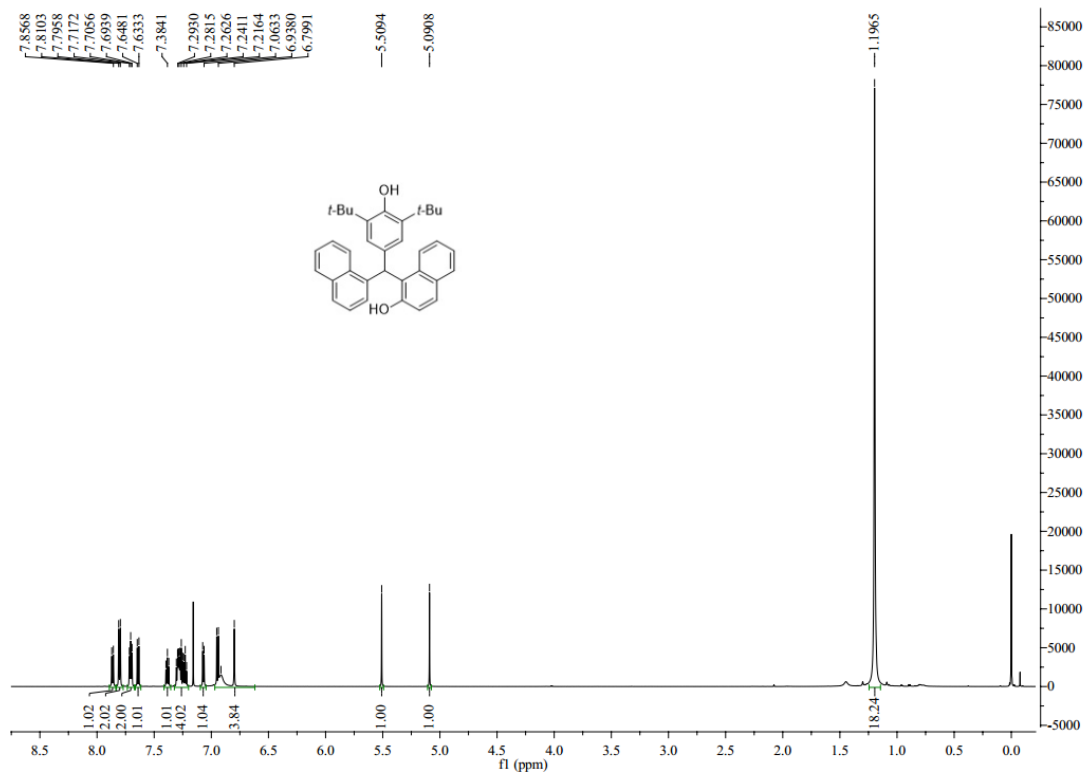

<sup>1</sup>H NMR Spectrum of **1r** (CDCl<sub>3</sub>, 600 MHz)

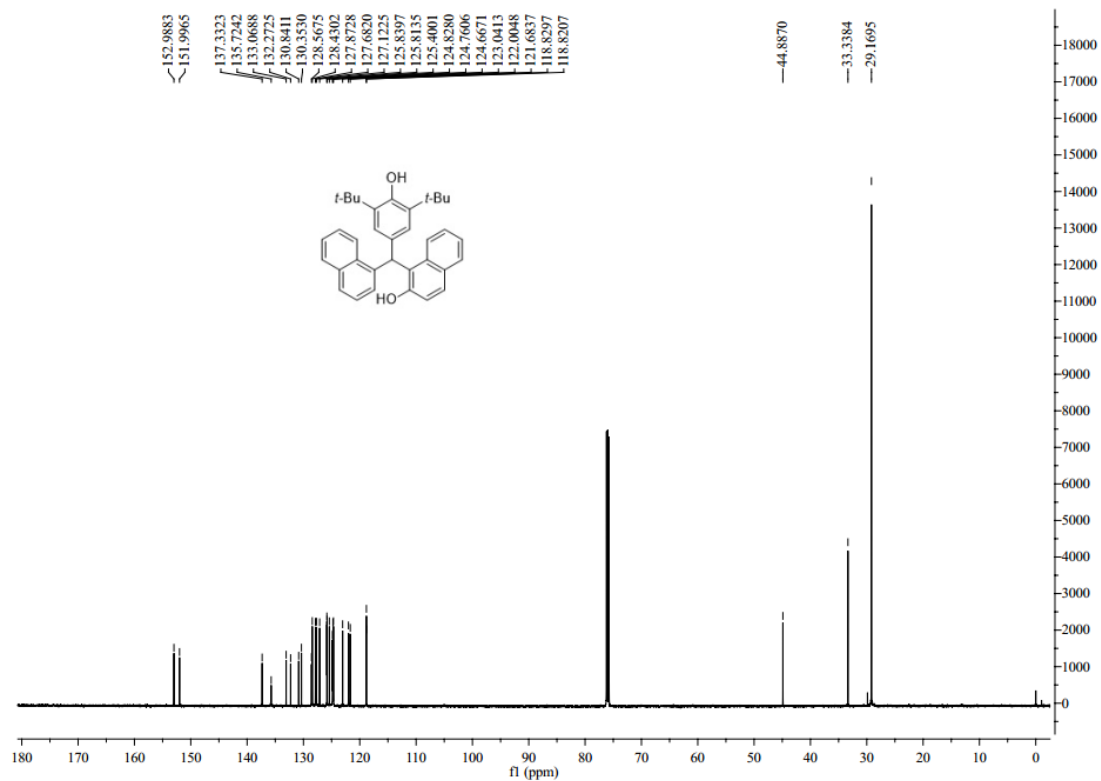

<sup>13</sup>C NMR Spectrum of **1r** (CDCl<sub>3</sub>, 150 MHz)

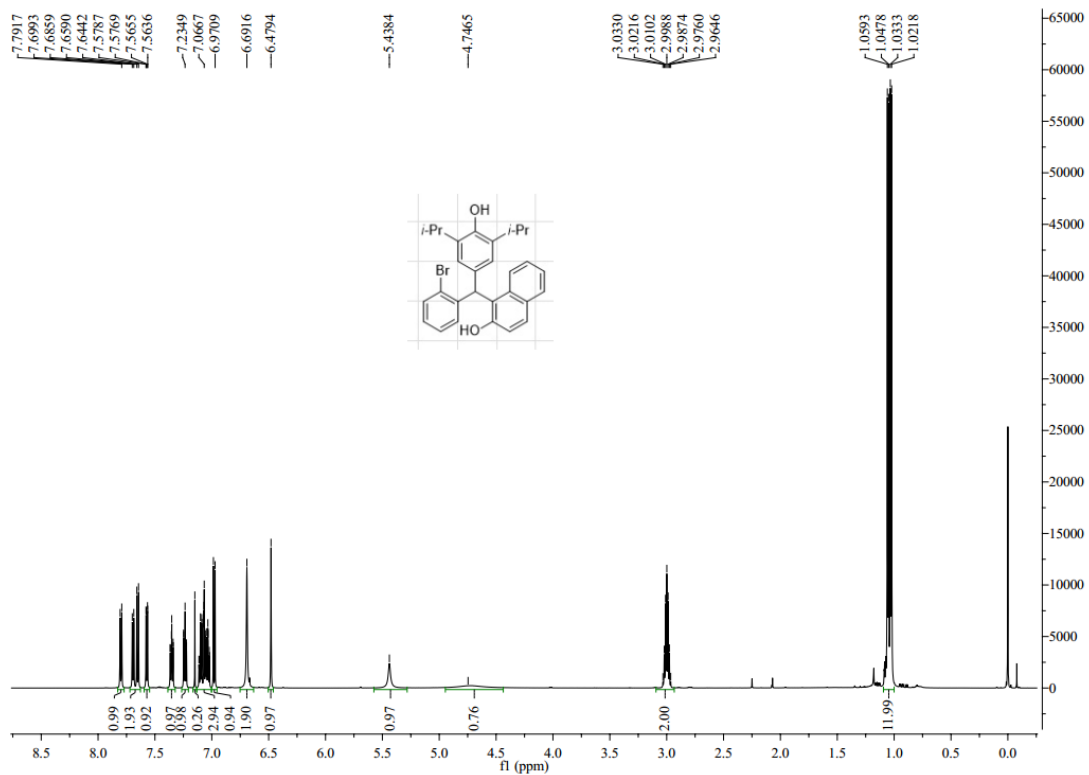

$^1\text{H}$  NMR Spectrum of **1s** ( $\text{CDCl}_3$ , 600 MHz)

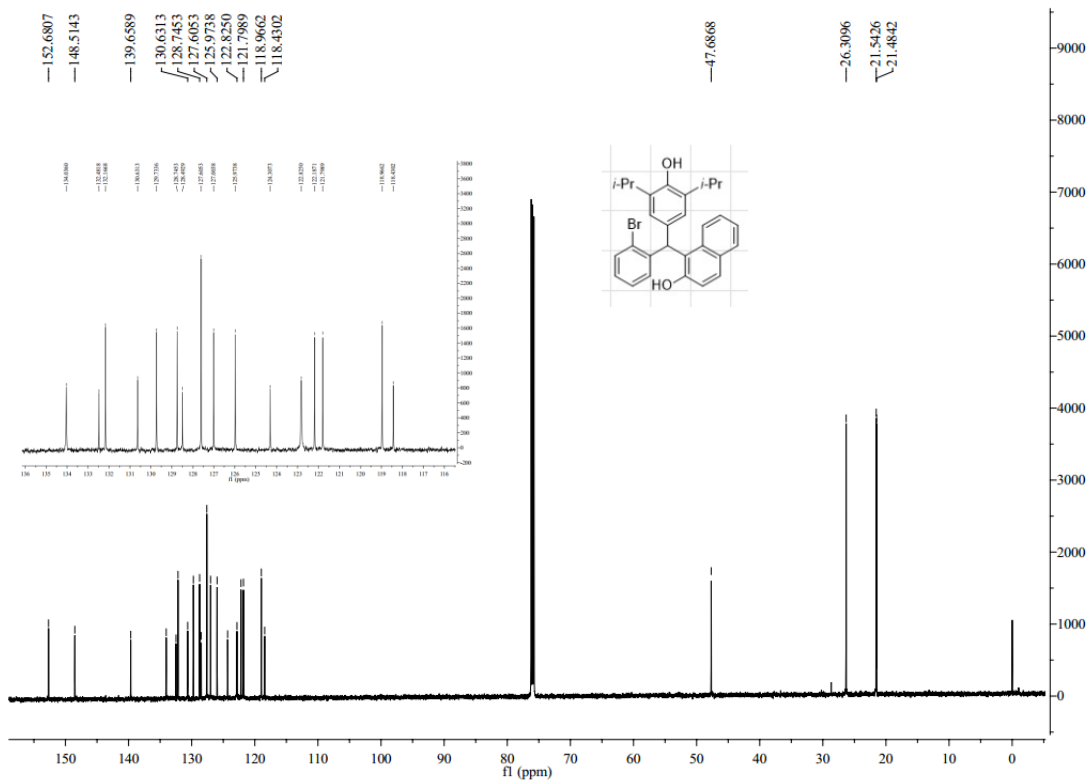

$^{13}\text{C}$  NMR Spectrum of **1s** ( $\text{CDCl}_3$ , 150 MHz)

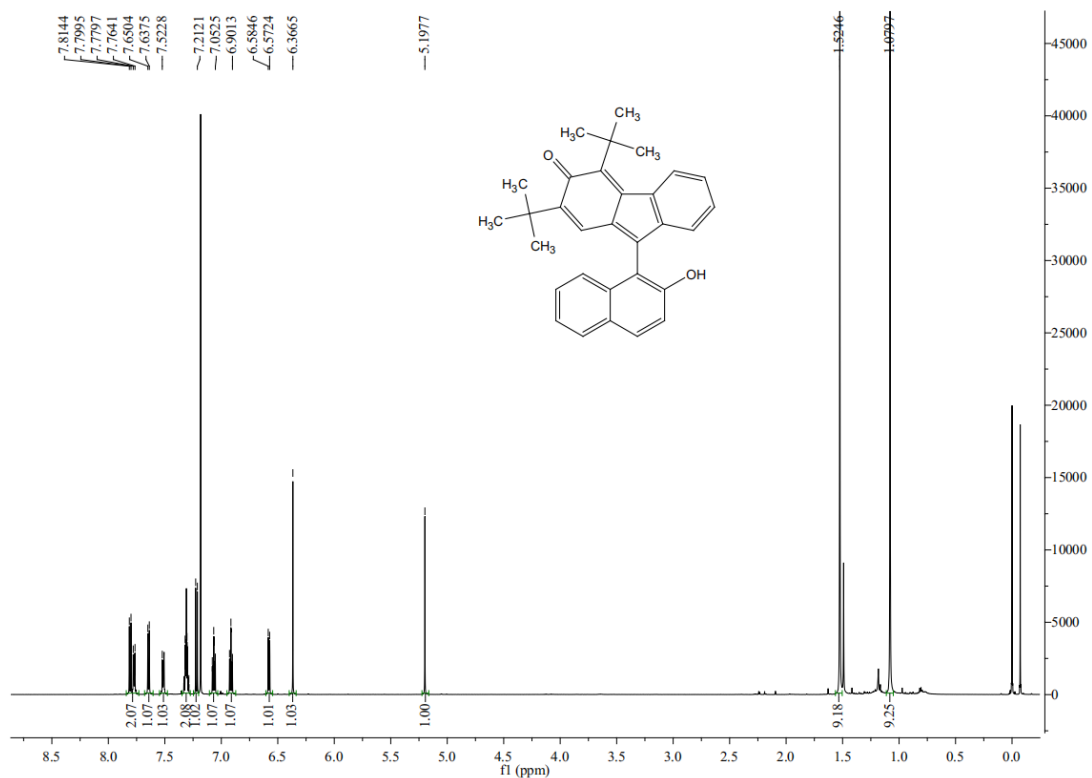

**<sup>1</sup>H NMR Spectrum of 2a (CDCl<sub>3</sub>, 600 MHz)**

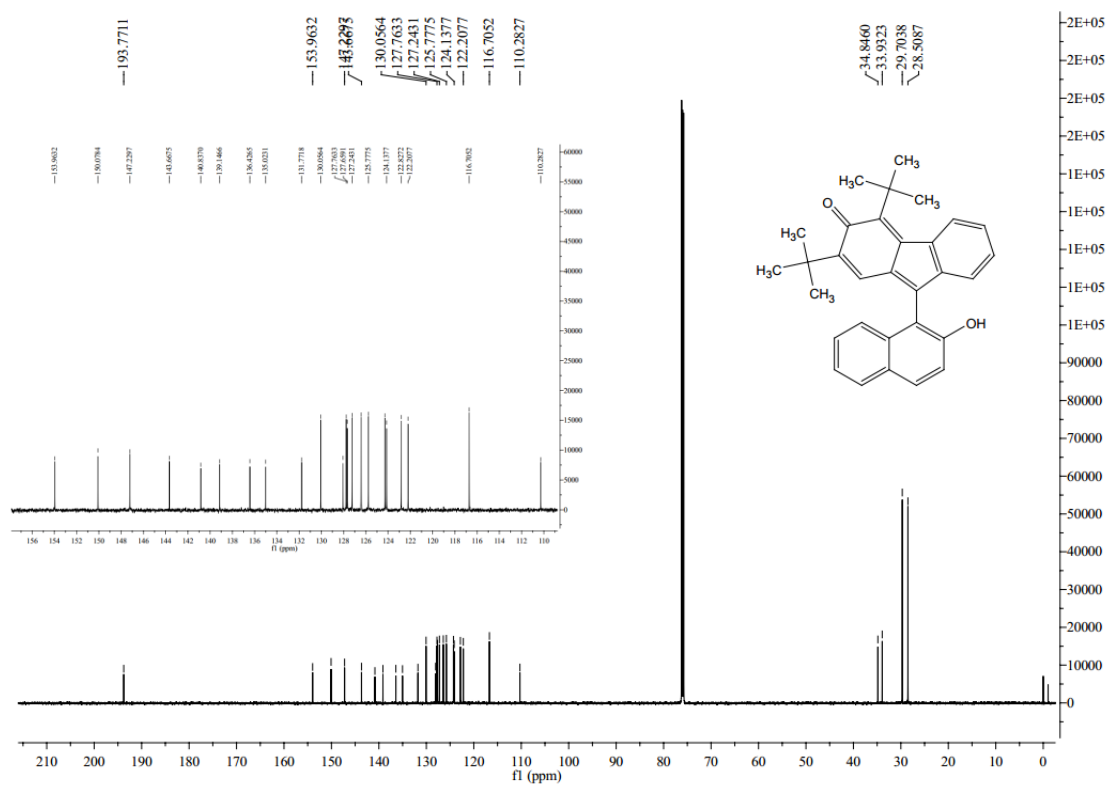

**<sup>13</sup>C NMR Spectrum of 2a (CDCl<sub>3</sub>, 150 MHz)**

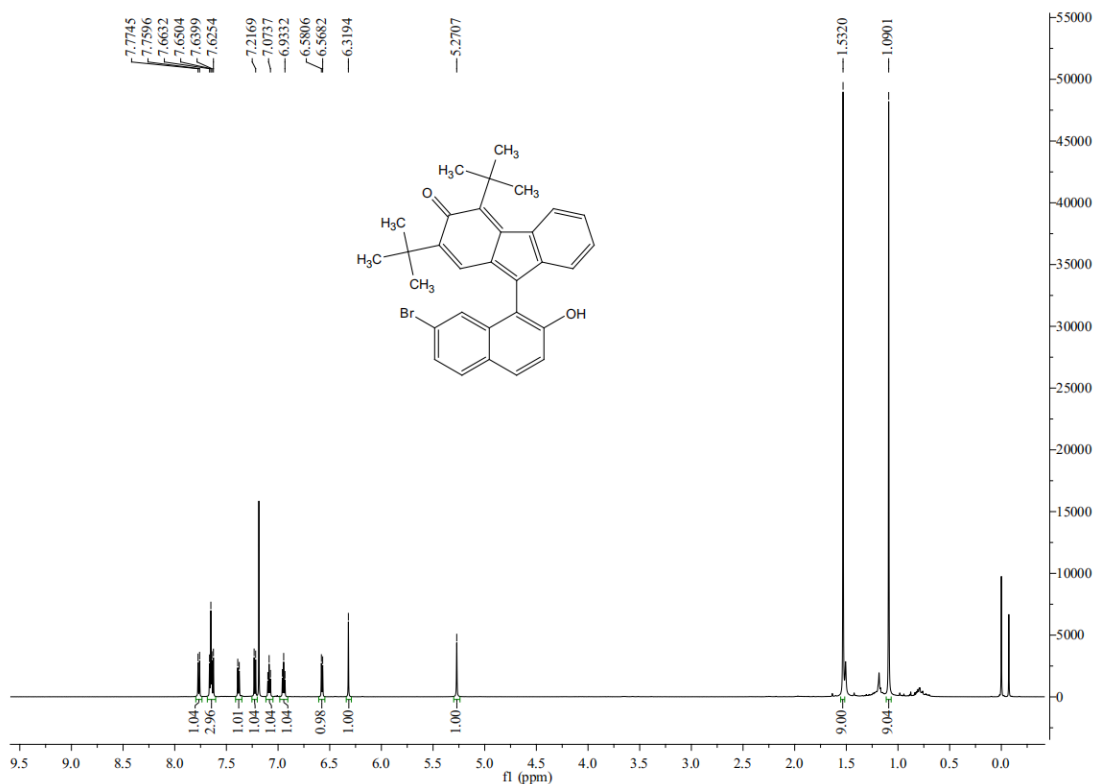

<sup>1</sup>H NMR Spectrum of **2b** (CDCl<sub>3</sub>, 600 MHz)

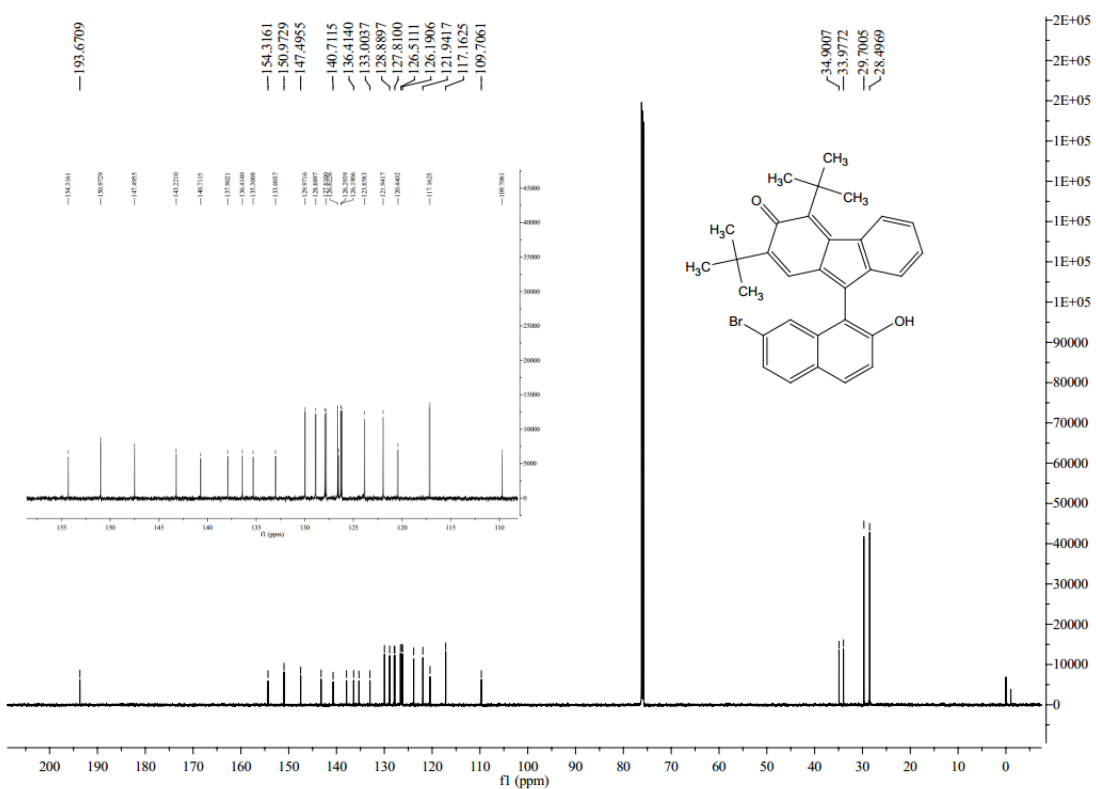

<sup>13</sup>C NMR Spectrum of **2b** (CDCl<sub>3</sub>, 150 MHz)

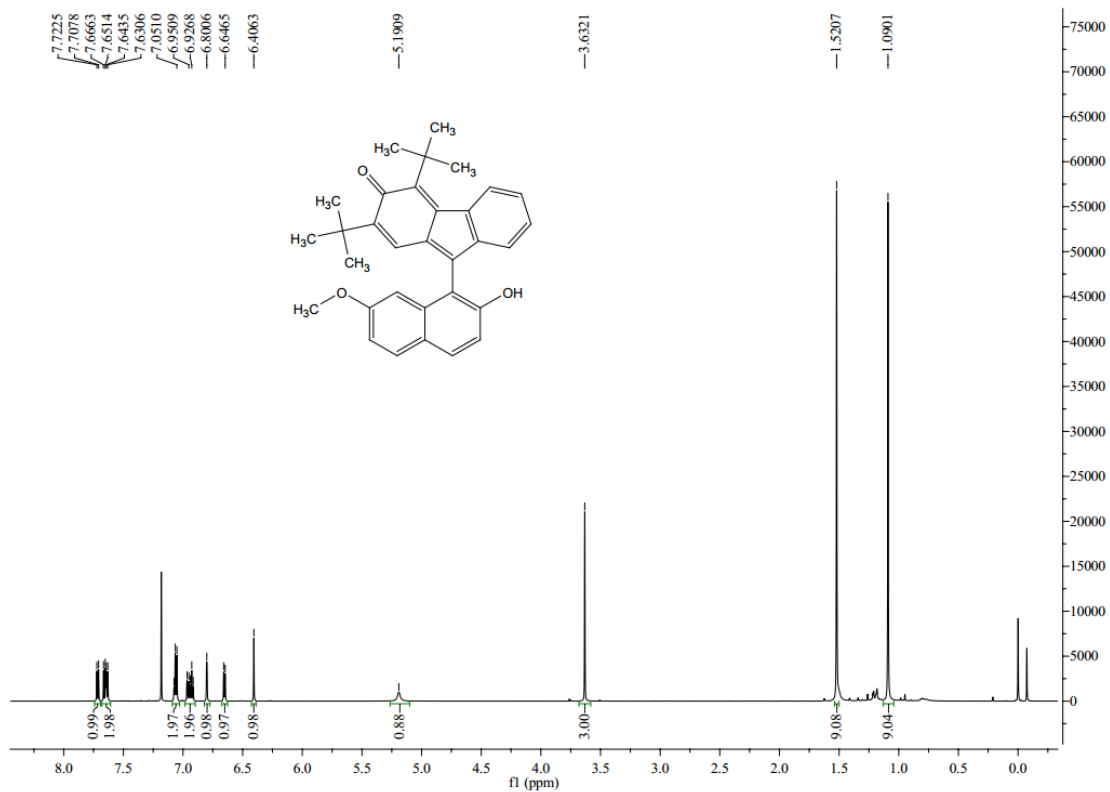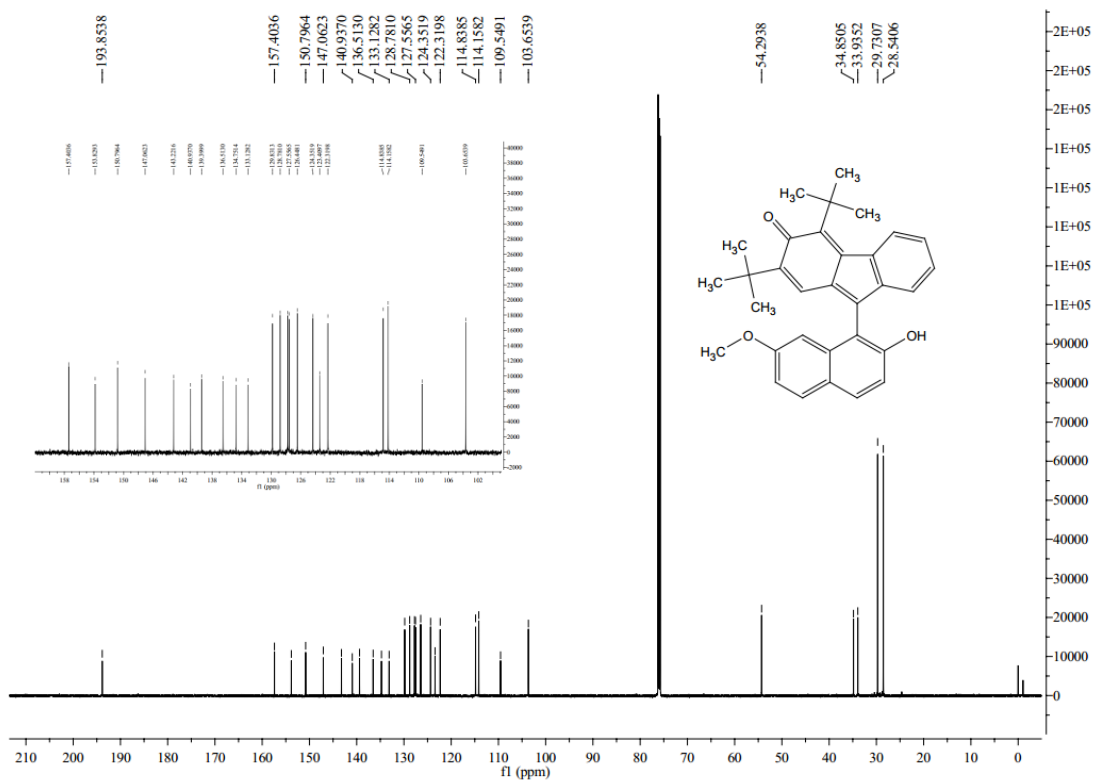

**<sup>13</sup>C NMR Spectrum of 2c (CDCl<sub>3</sub>, 150 MHz)**



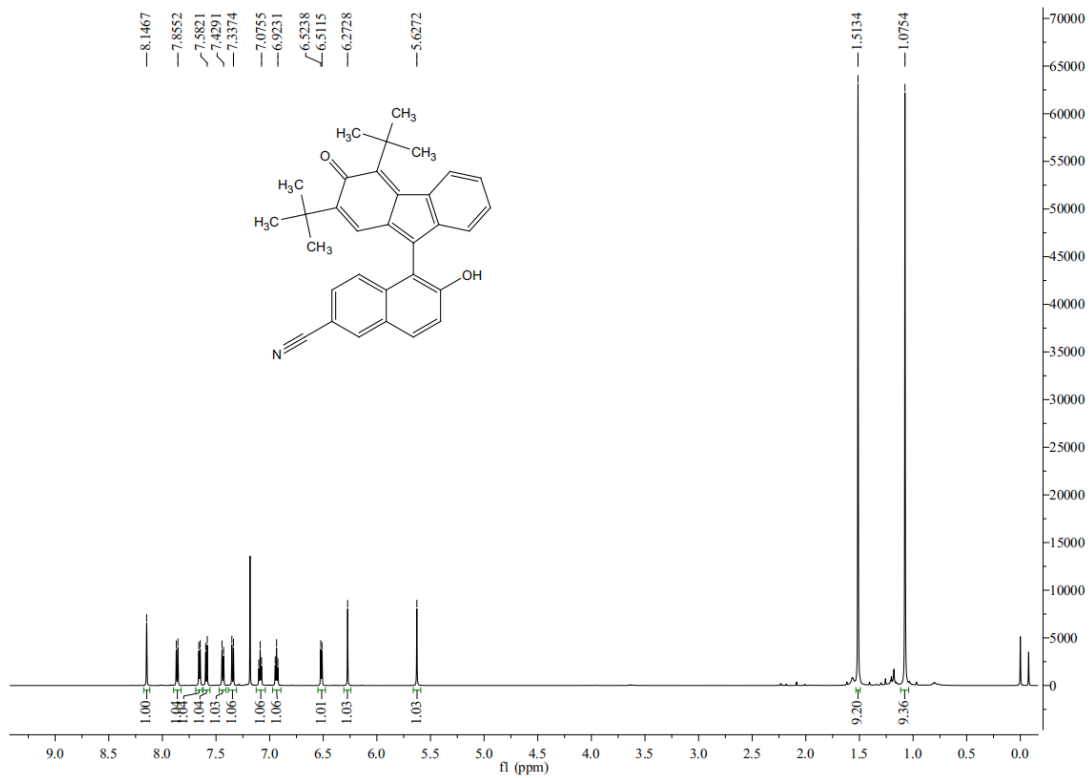

<sup>1</sup>H NMR Spectrum of **2d** (CDCl<sub>3</sub>, 600 MHz)

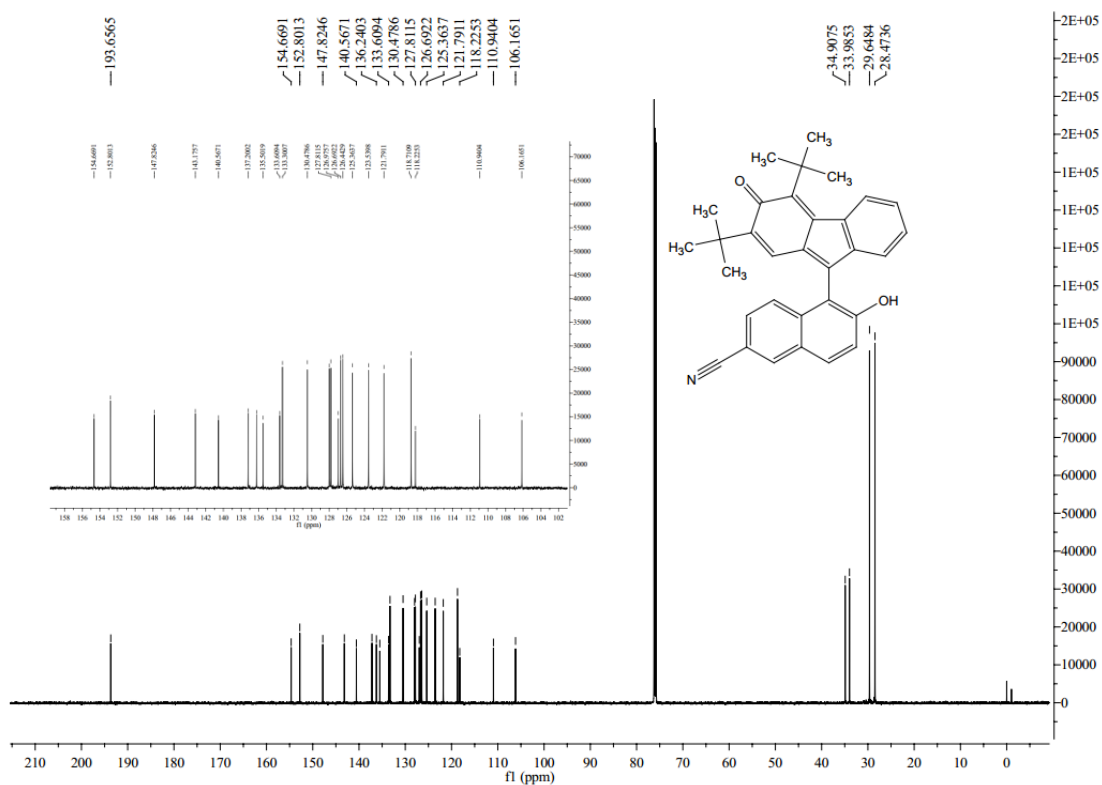

<sup>13</sup>C NMR Spectrum of **2d** (CDCl<sub>3</sub>, 150 MHz)

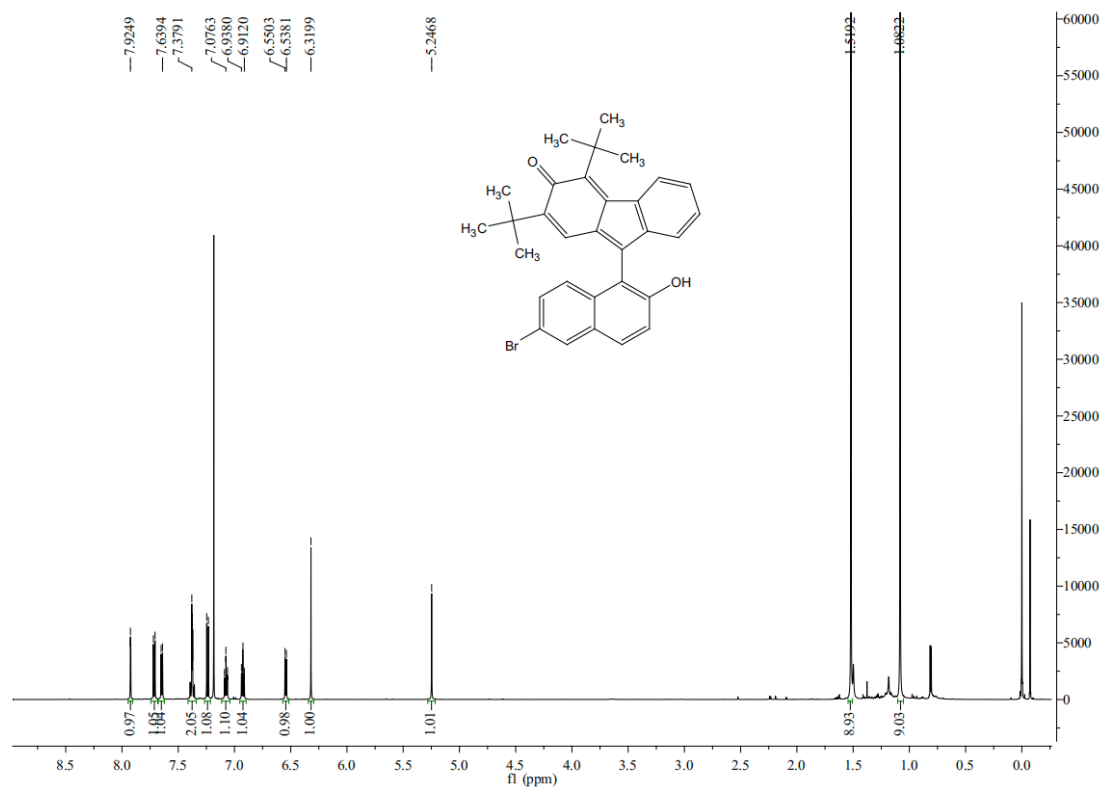

**<sup>1</sup>H NMR Spectrum of 2e (CDCl<sub>3</sub>, 600 MHz)**

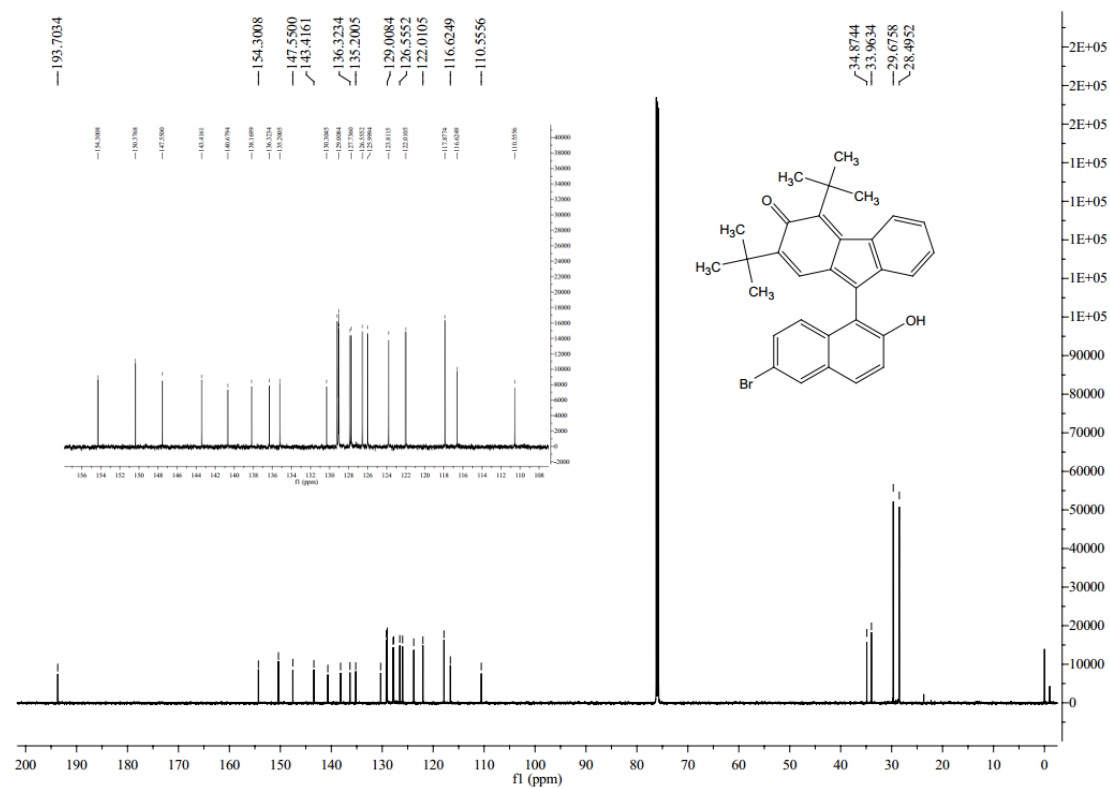

**<sup>13</sup>C NMR Spectrum of 2e (CDCl<sub>3</sub>, 150 MHz)**

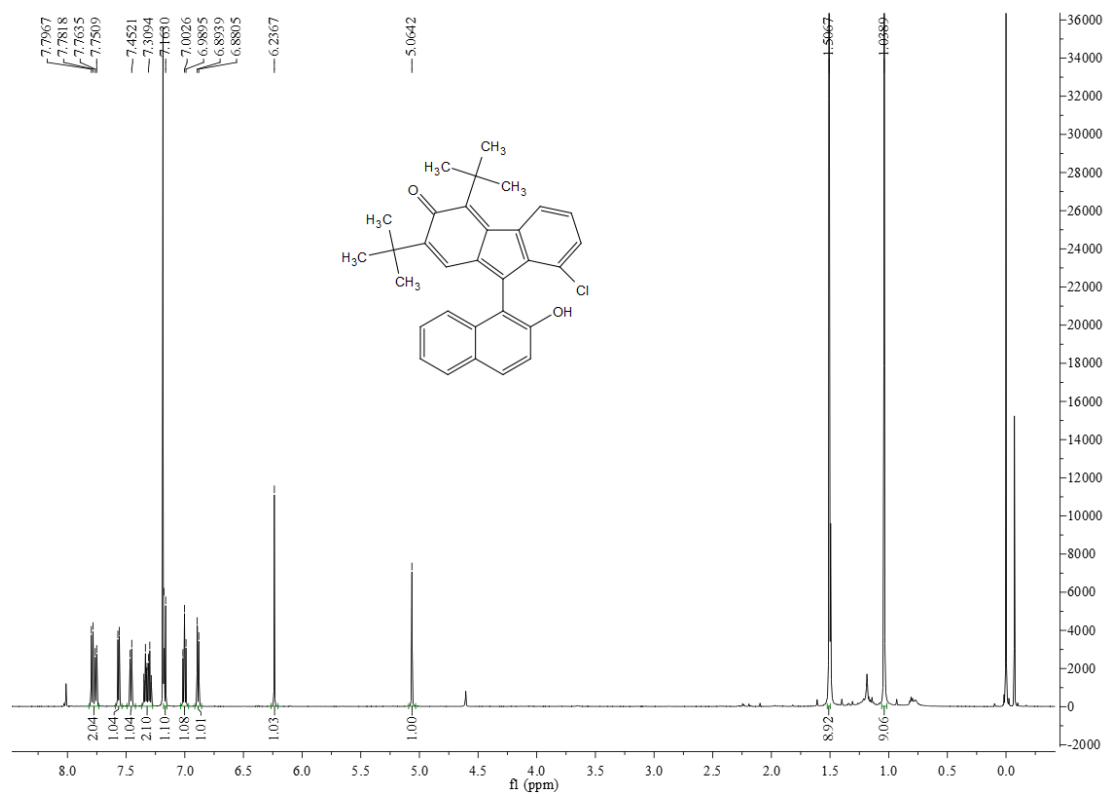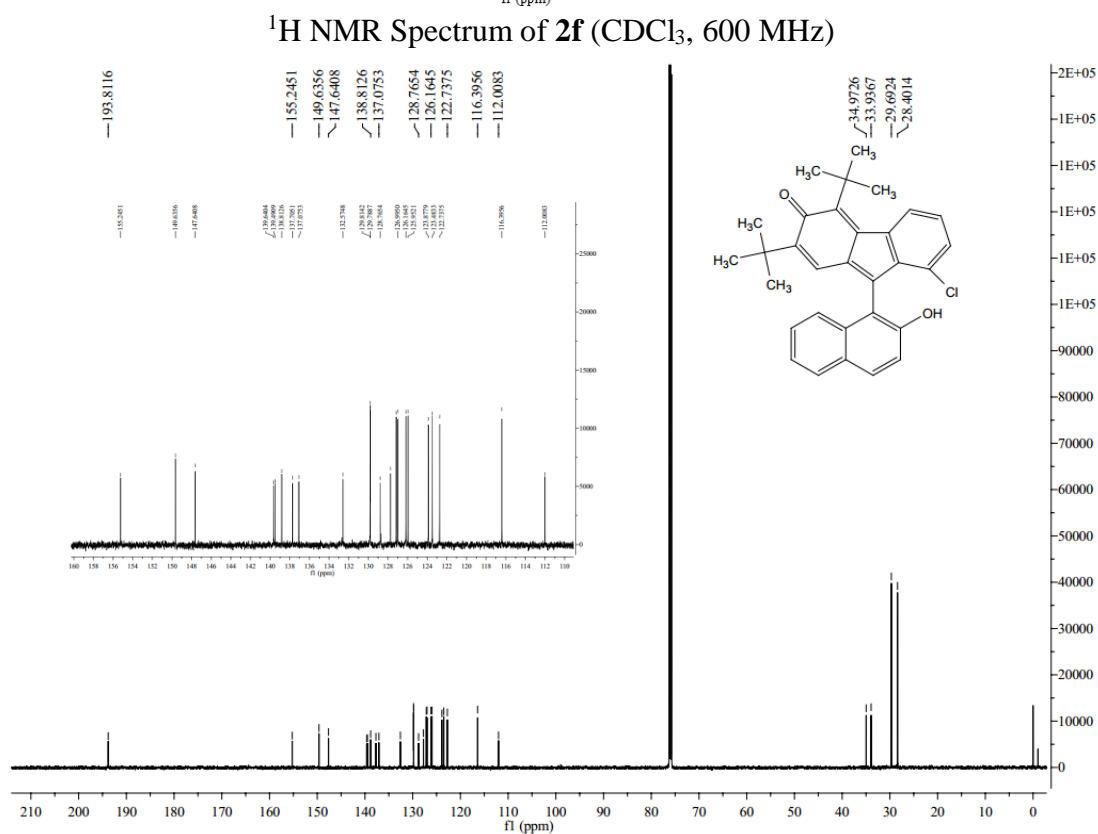

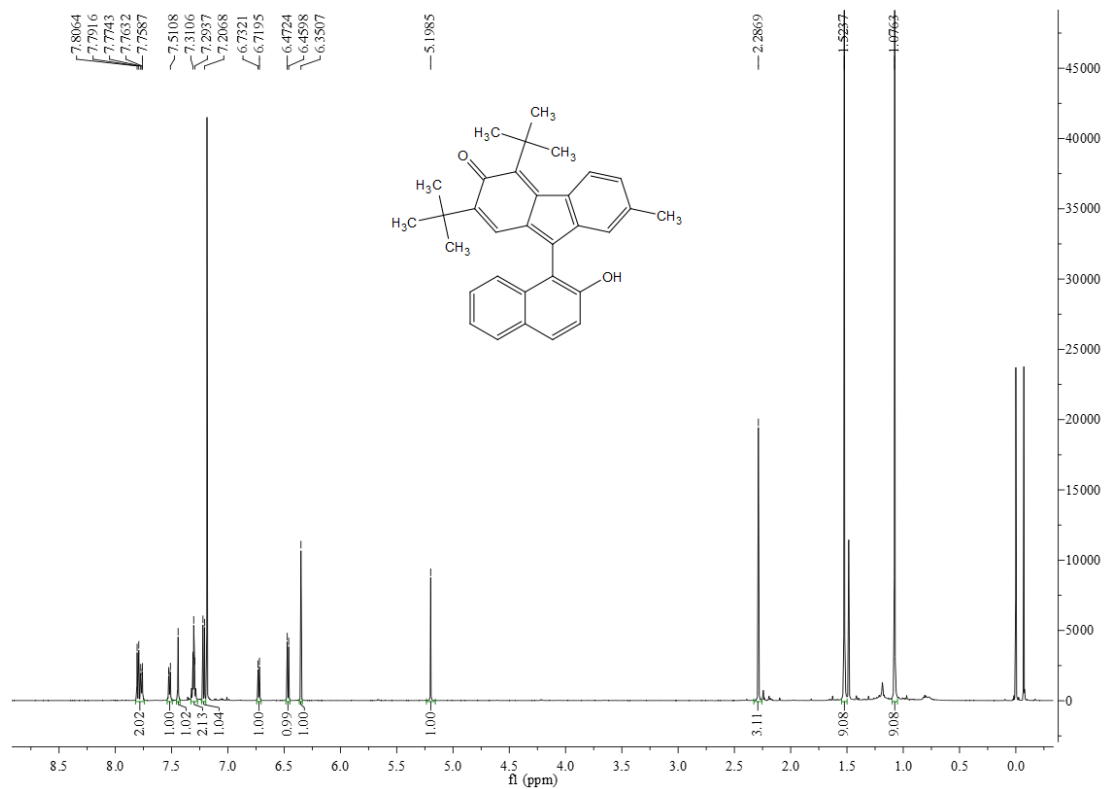

<sup>1</sup>H NMR Spectrum of **2g** (CDCl<sub>3</sub>, 600 MHz)

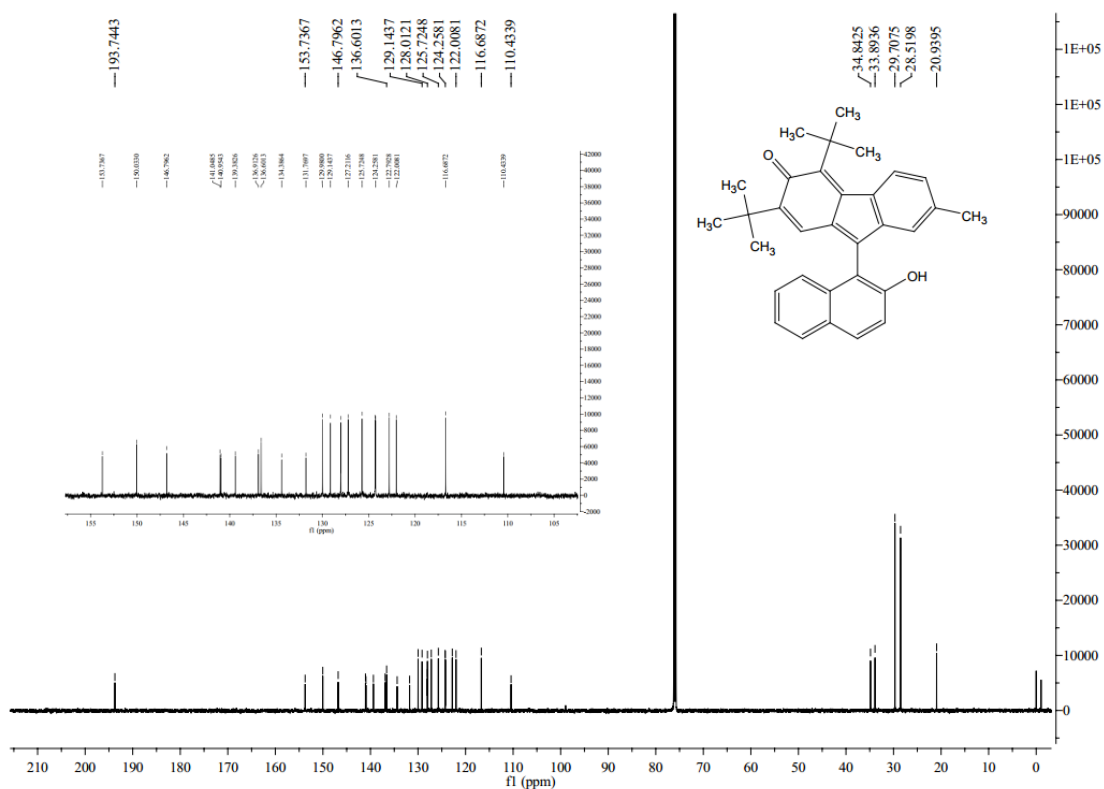

<sup>13</sup>C NMR Spectrum of **2g** (CDCl<sub>3</sub>, 150 MHz)

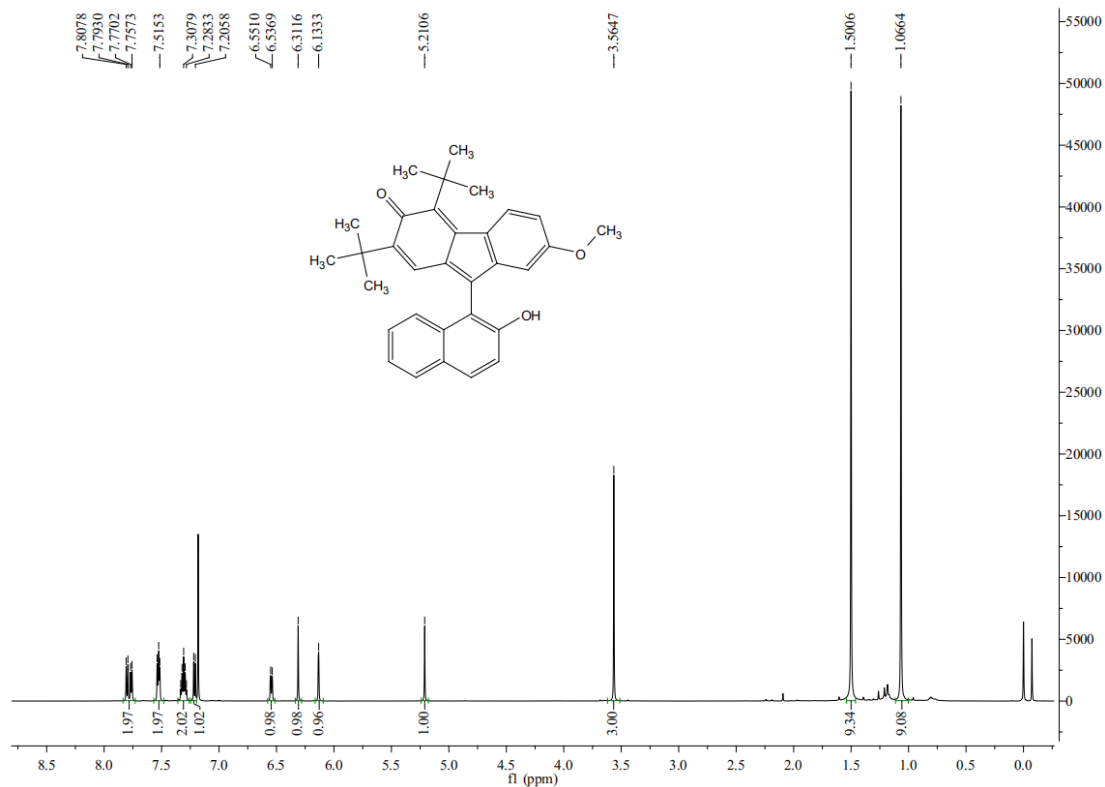

$^1\text{H}$  NMR Spectrum of **2h** ( $\text{CDCl}_3$ , 600 MHz)

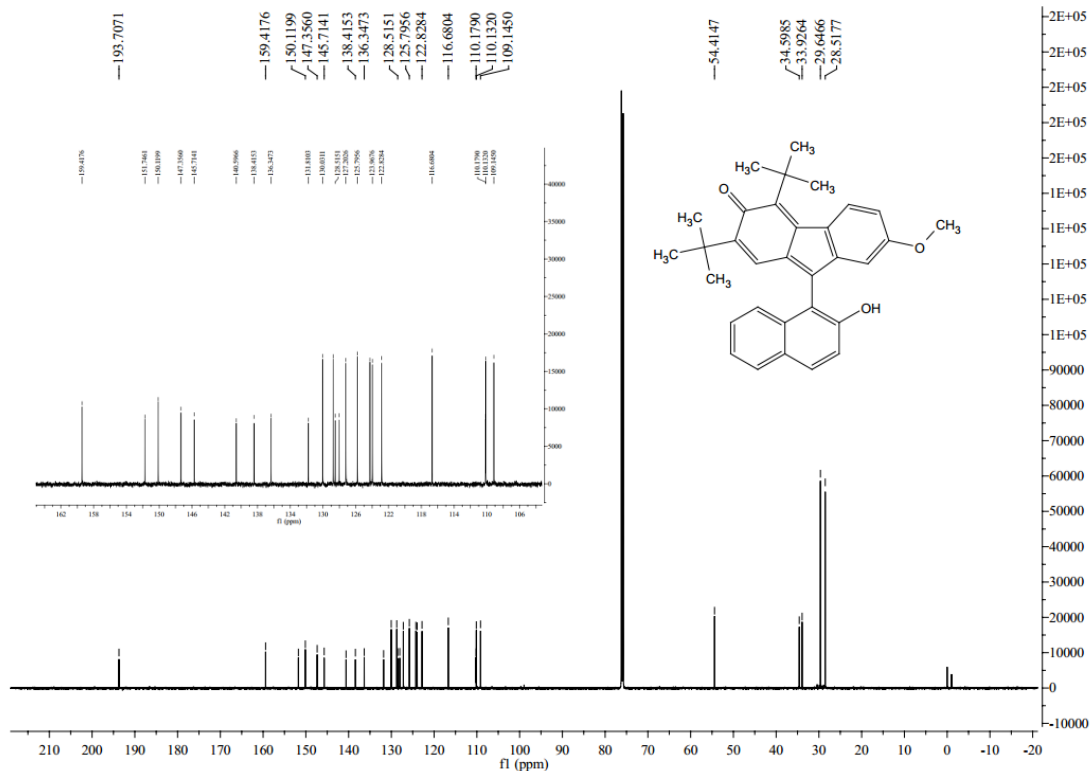

$^{13}\text{C}$  NMR Spectrum of **2h** ( $\text{CDCl}_3$ , 150 MHz)

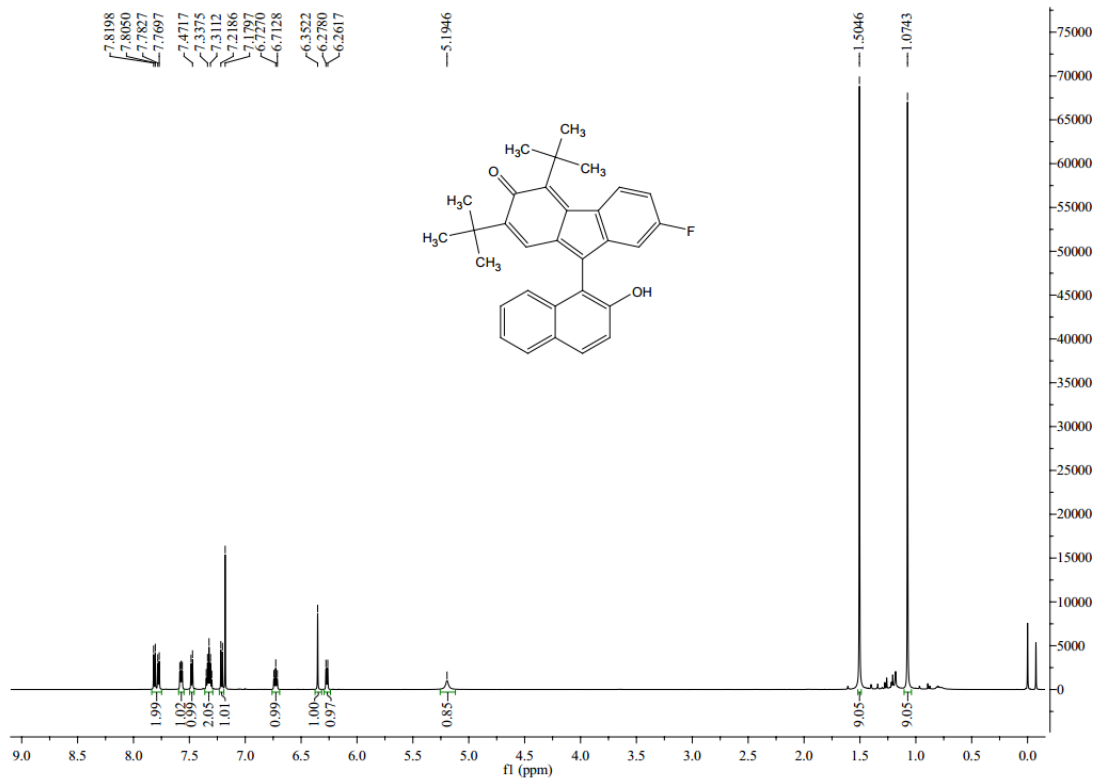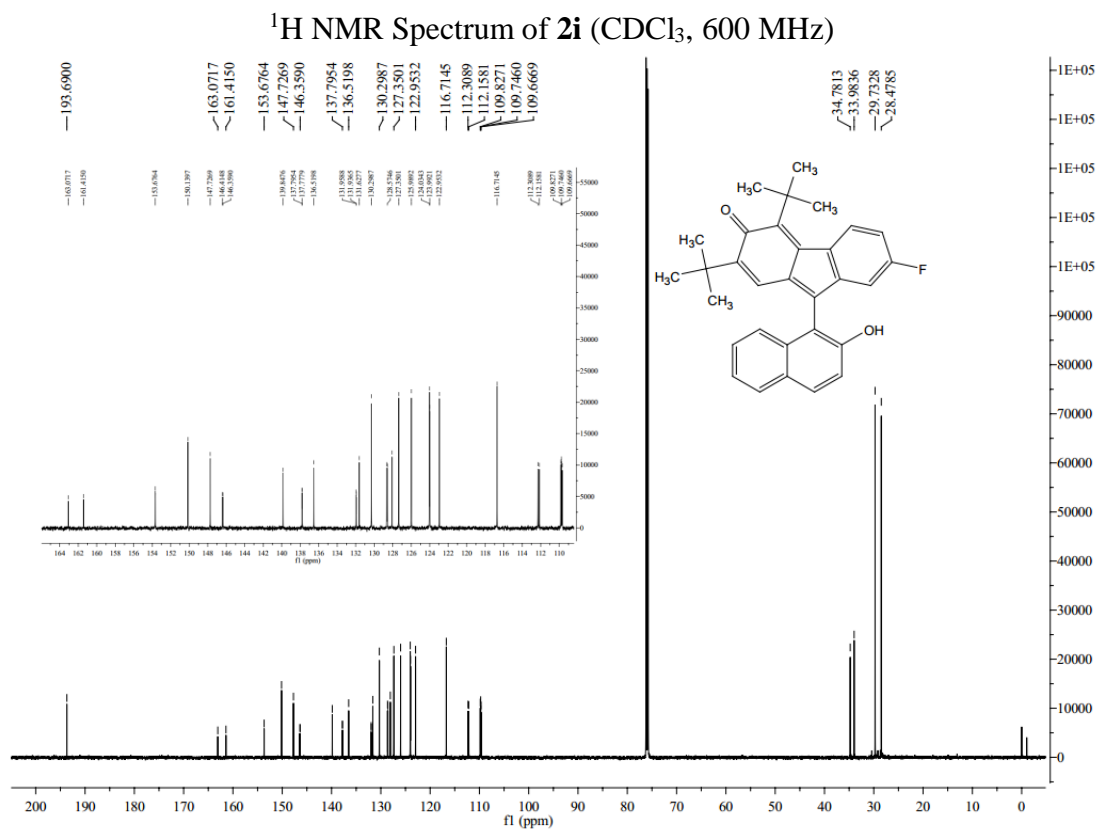

**<sup>13</sup>C NMR Spectrum of 2i (CDCl<sub>3</sub>, 150 MHz)**

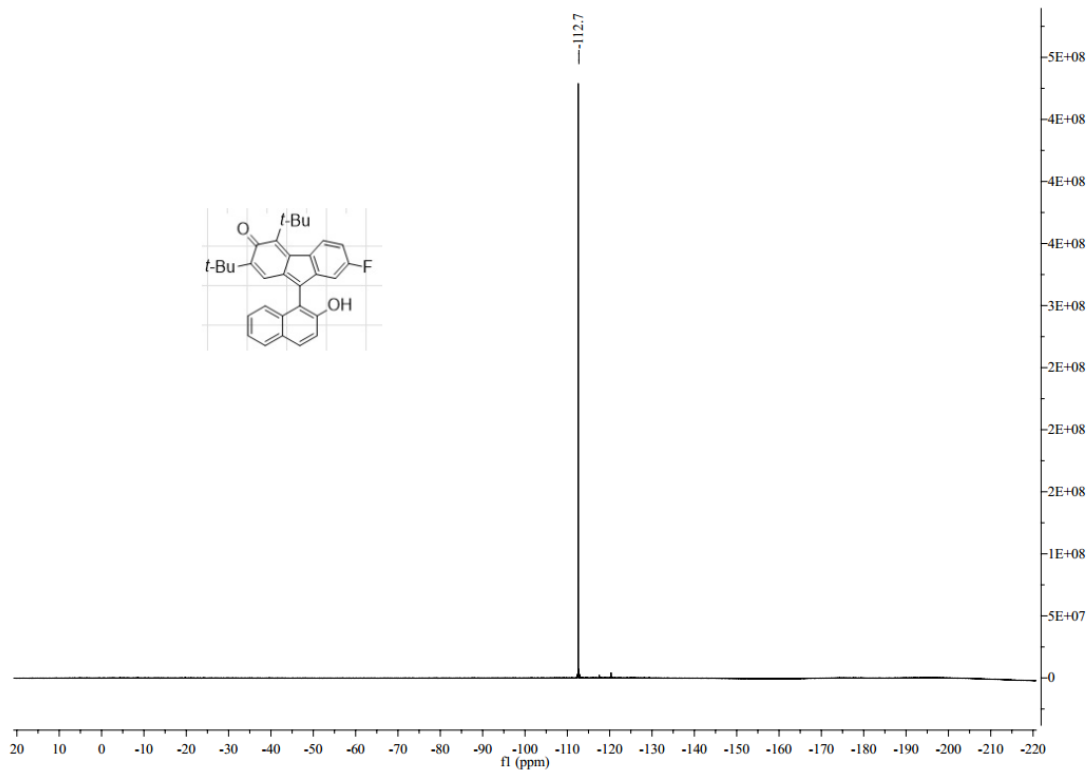

<sup>19</sup>F NMR Spectrum of **2i** (CDCl<sub>3</sub>, 377 MHz)

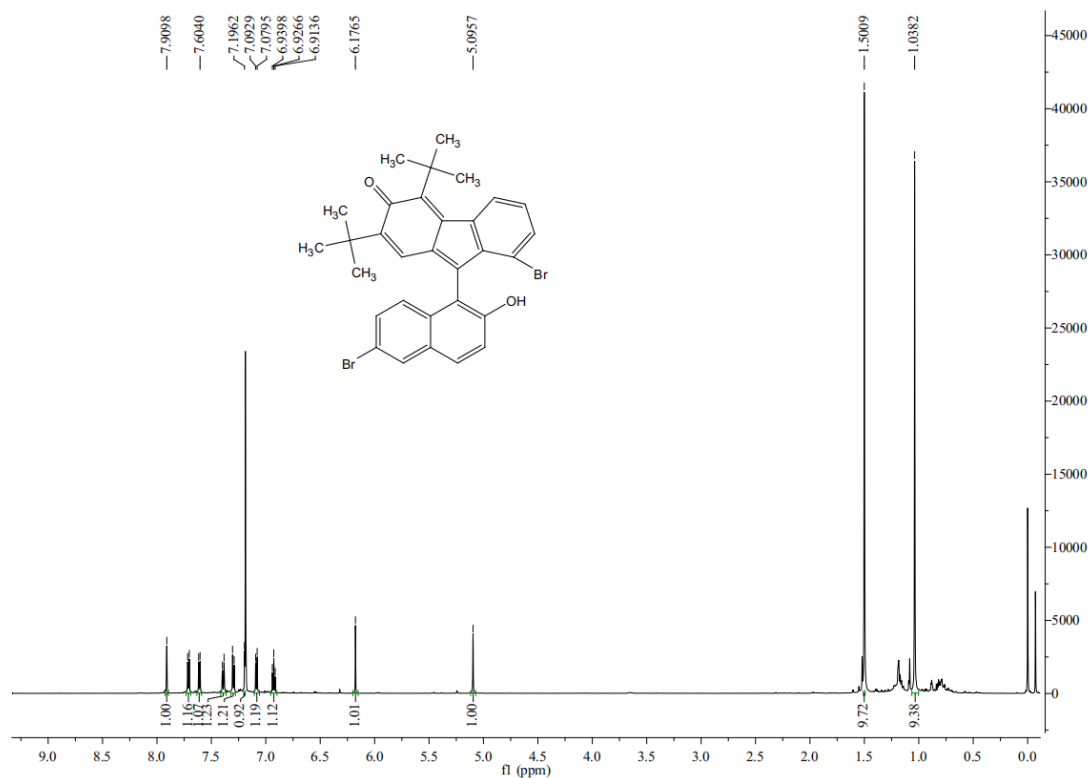

<sup>1</sup>H NMR Spectrum of **2j** (CDCl<sub>3</sub>, 600 MHz)

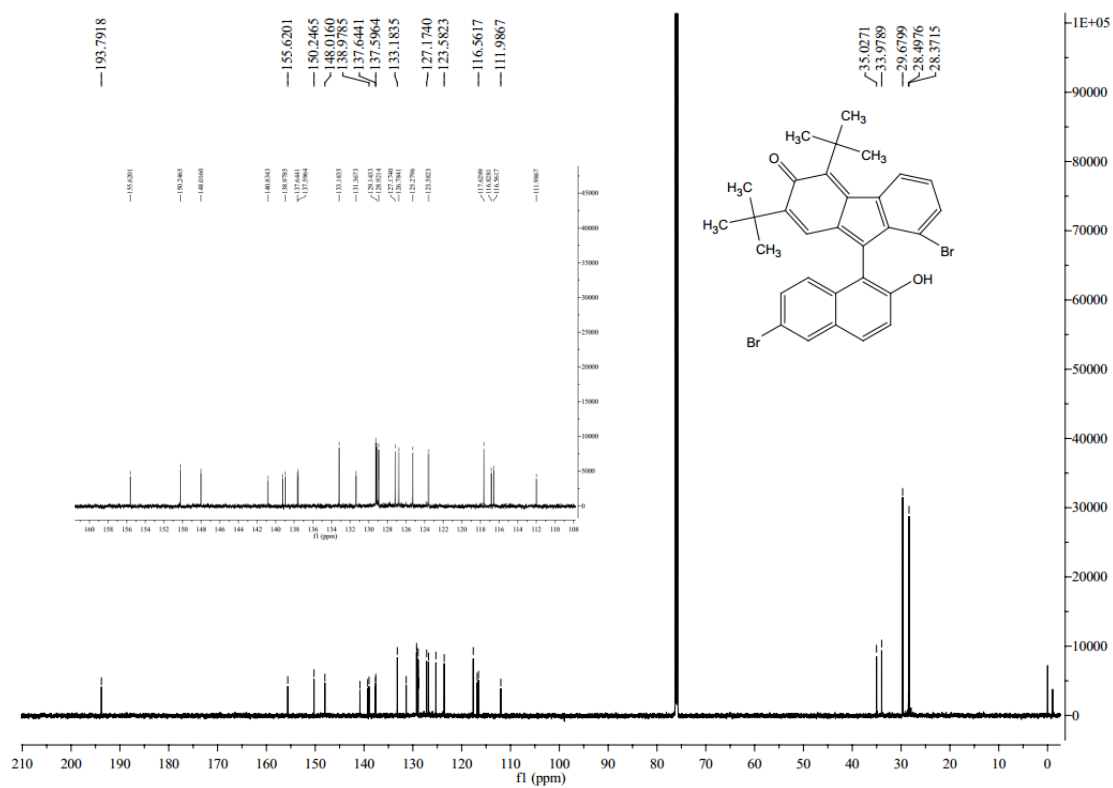

<sup>13</sup>C NMR Spectrum of **2j** (CDCl<sub>3</sub>, 150 MHz)



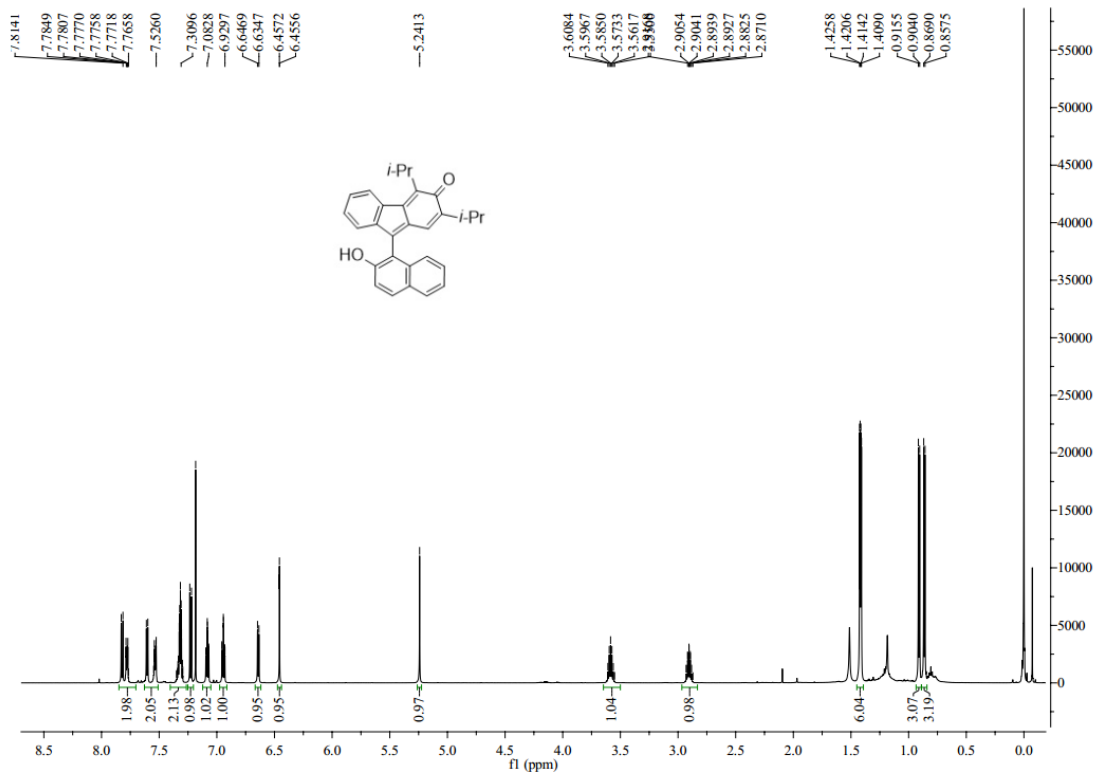

**<sup>1</sup>H NMR Spectrum of **2k** (CDCl<sub>3</sub>, 600 MHz)**

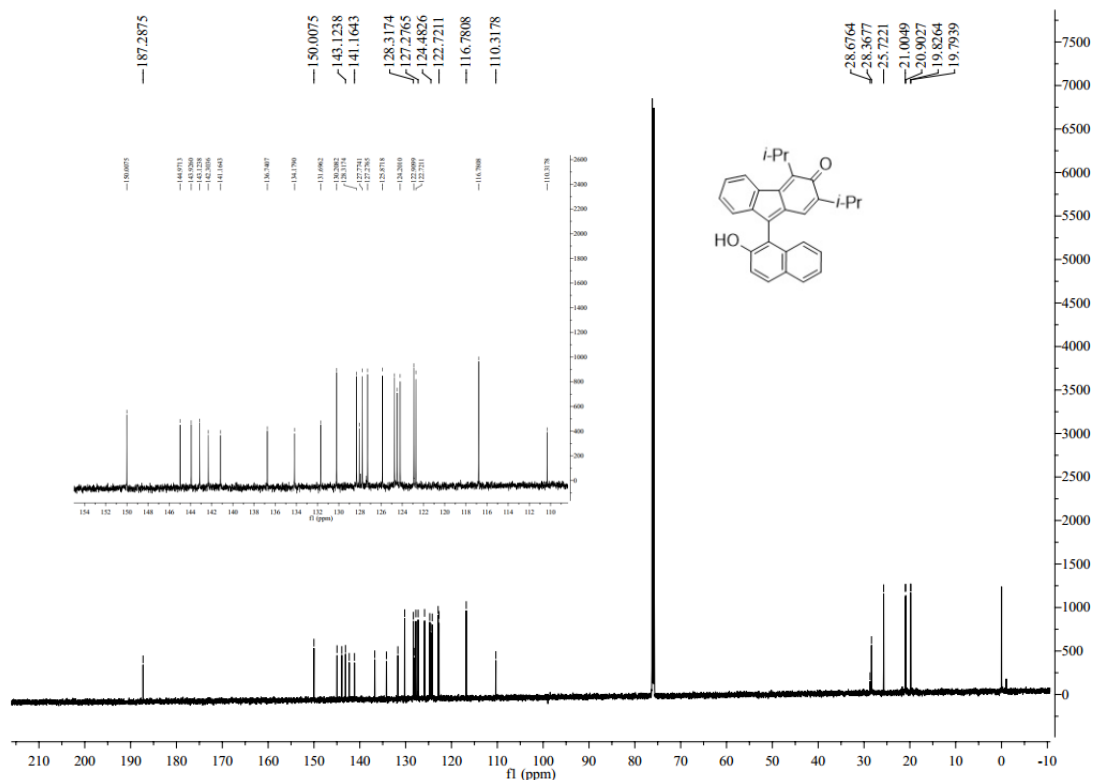

**<sup>13</sup>C NMR Spectrum of **2k** (CDCl<sub>3</sub>, 150 MHz)**

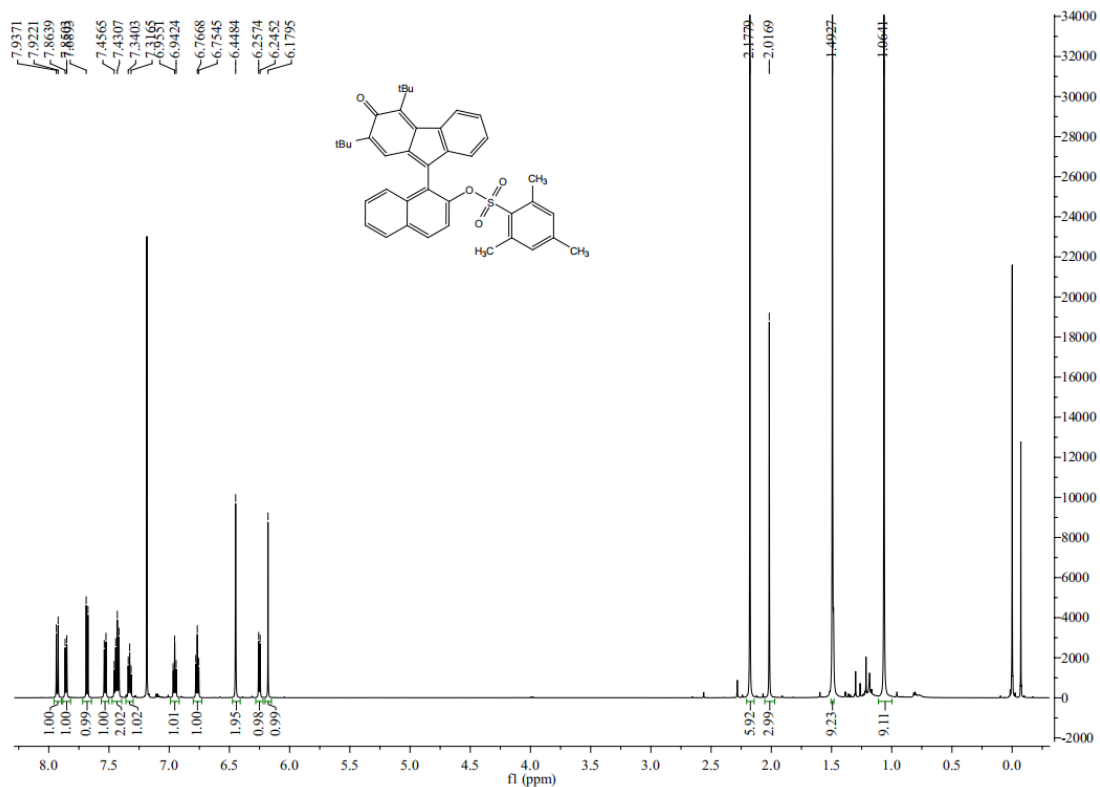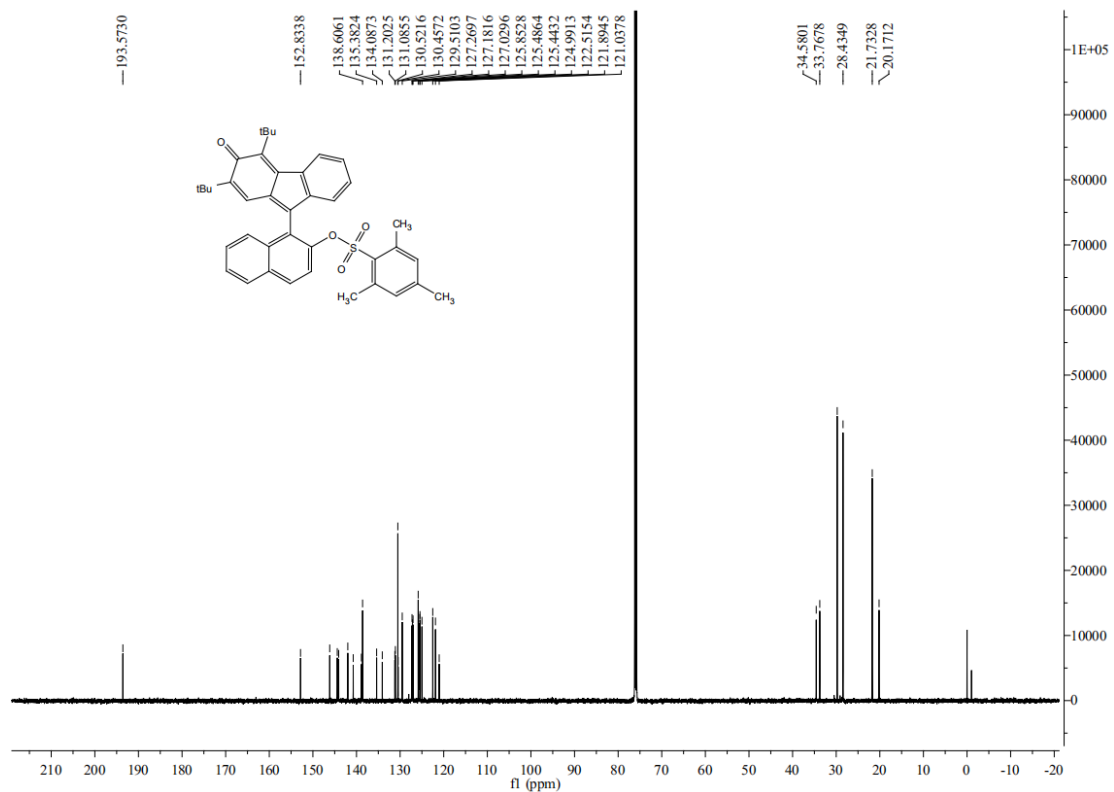

**<sup>13</sup>C NMR Spectrum of 2a' (CDCl<sub>3</sub>, 150 MHz)**

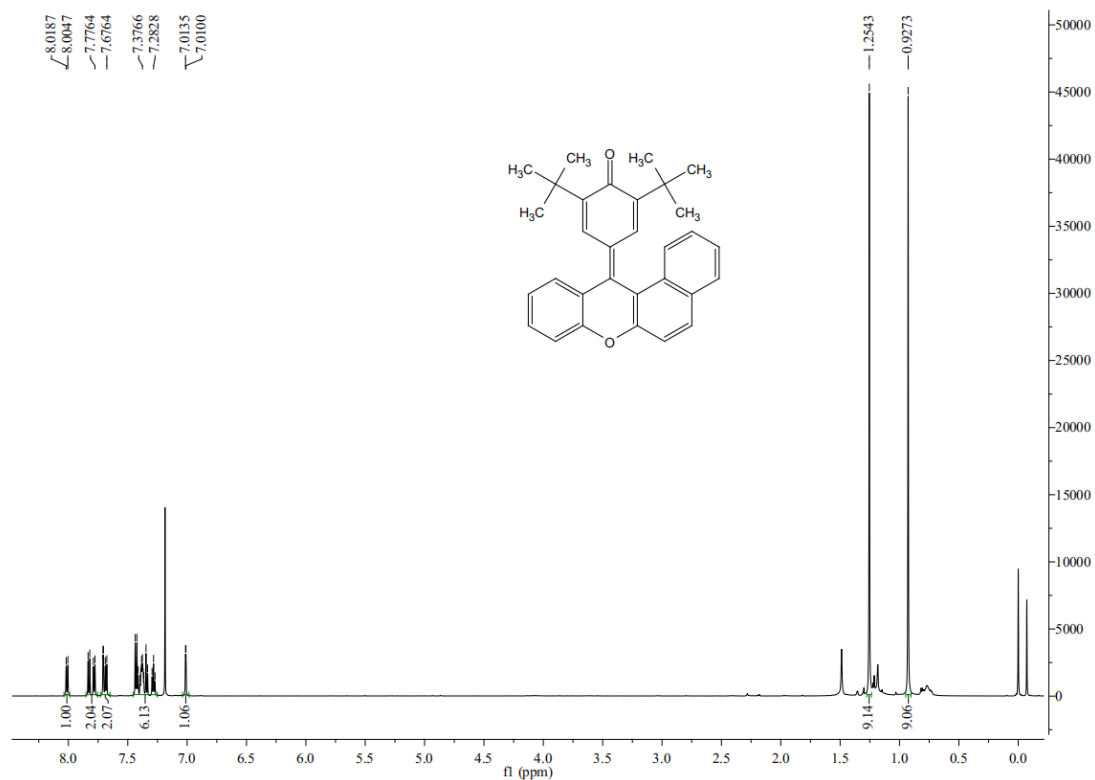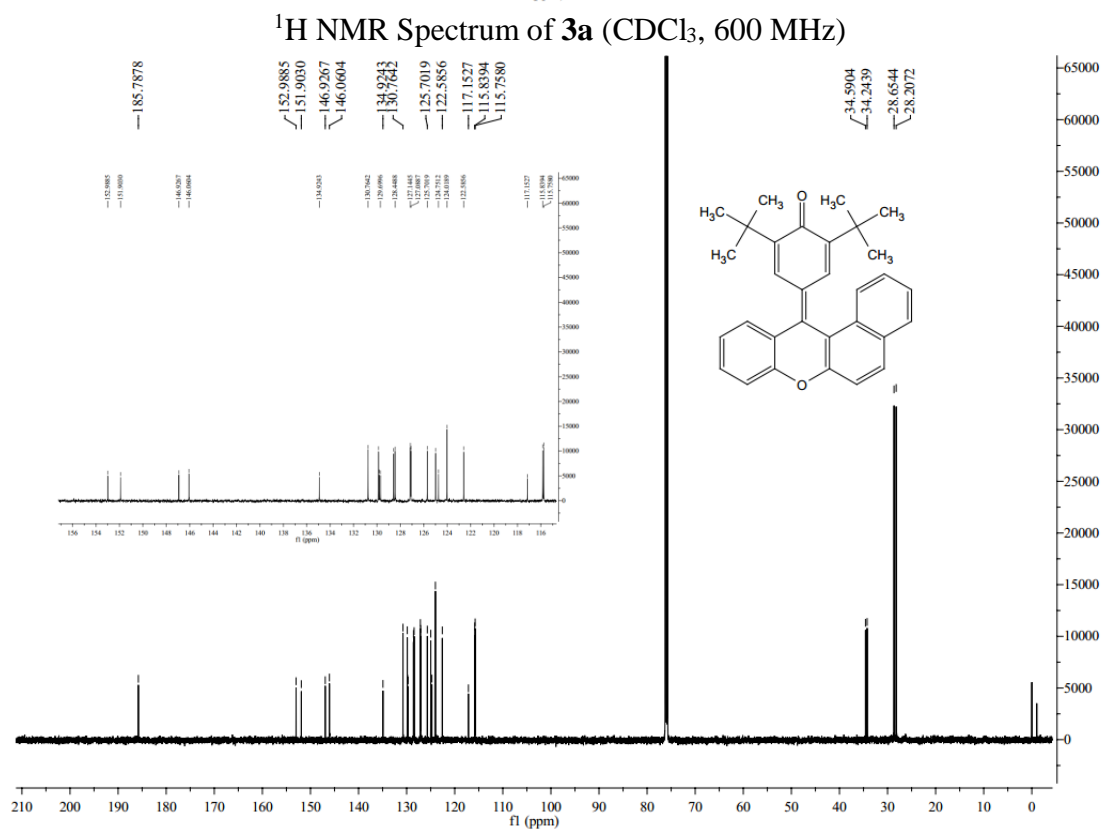

**<sup>13</sup>C NMR Spectrum of 3a (CDCl<sub>3</sub>, 150 MHz)**

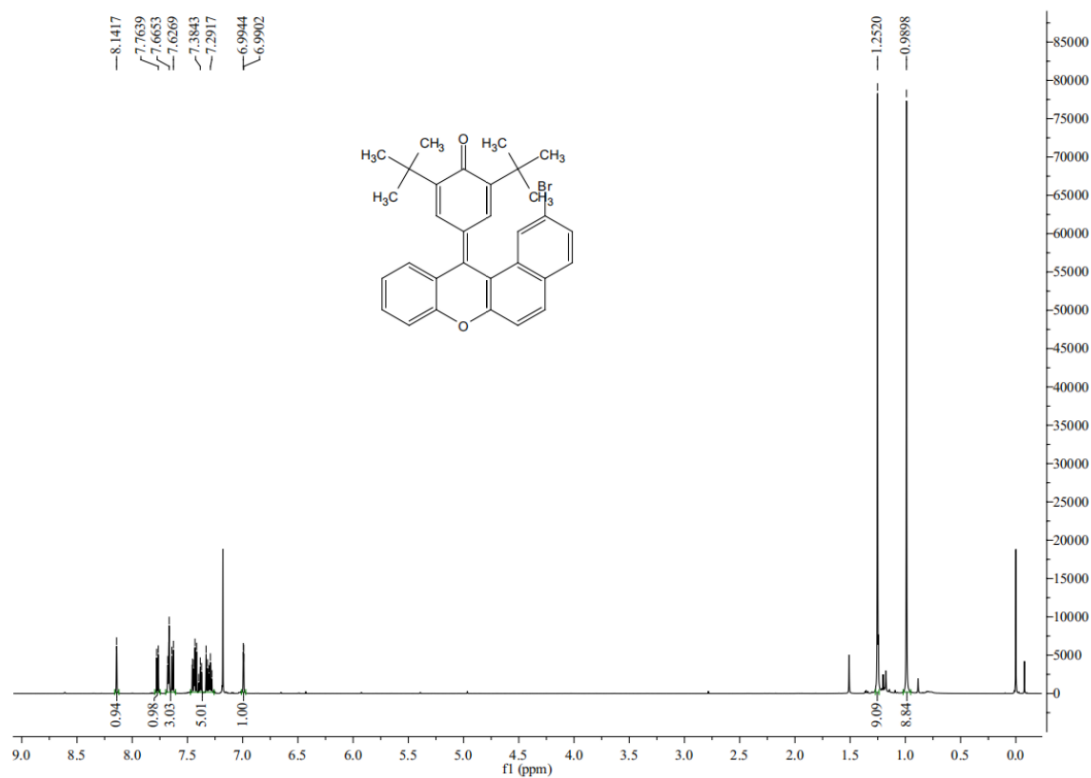

**<sup>1</sup>H NMR Spectrum of **3b** (CDCl<sub>3</sub>, 600 MHz)**

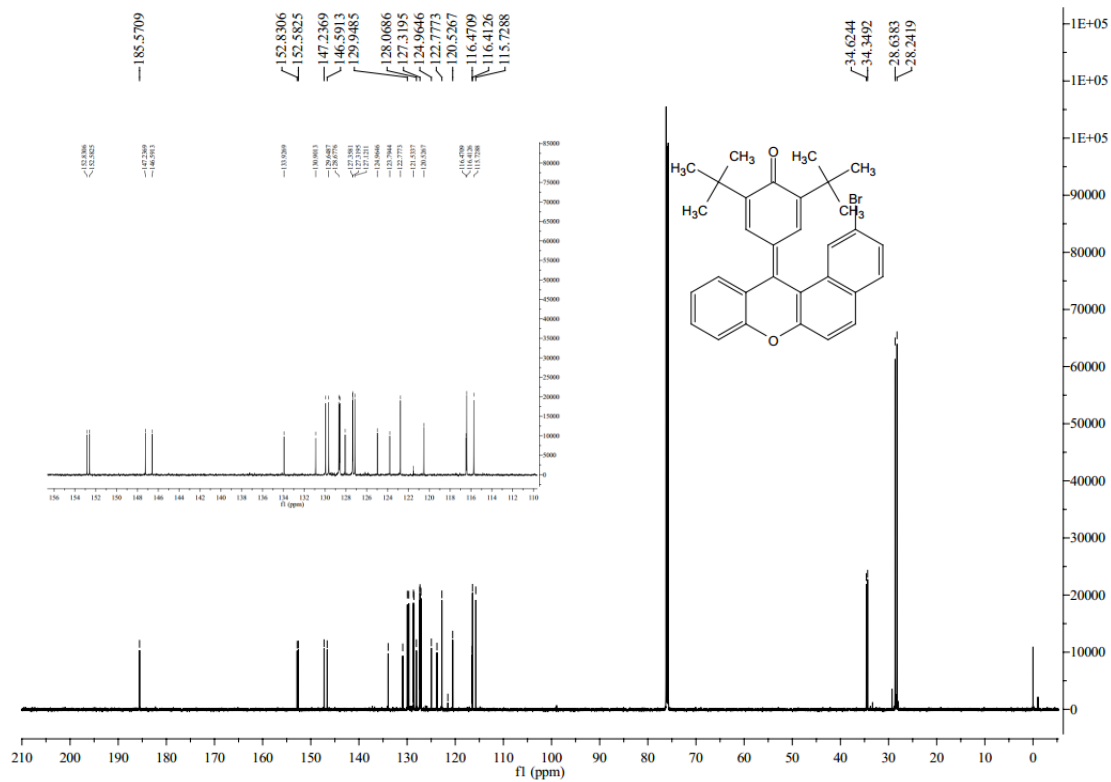

**<sup>13</sup>C NMR Spectrum of **3b** (CDCl<sub>3</sub>, 150 MHz)**

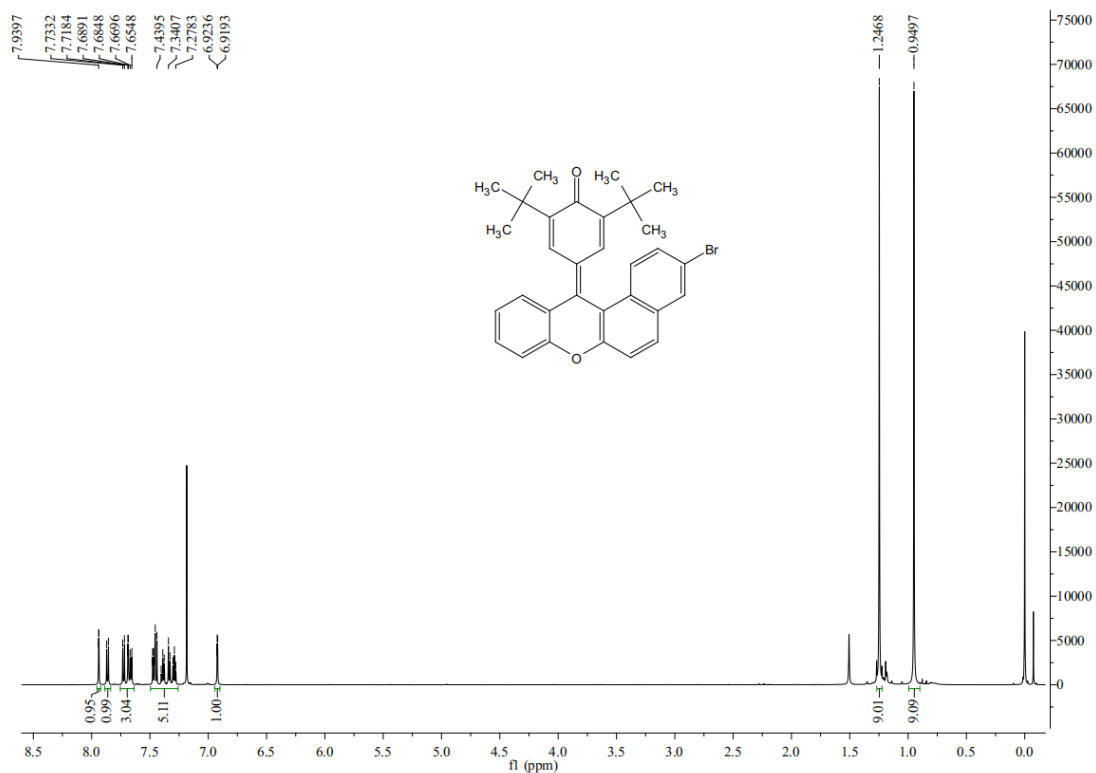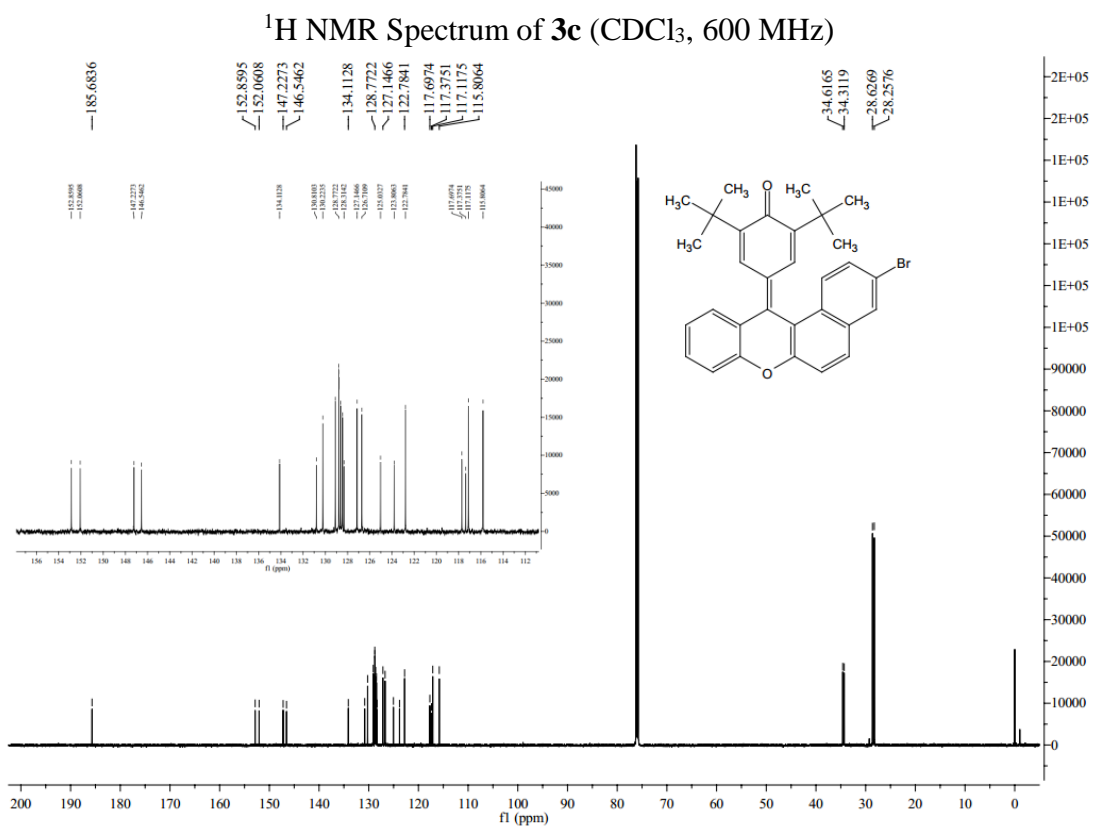

**<sup>13</sup>C NMR Spectrum of 3c (CDCl<sub>3</sub>, 150 MHz)**

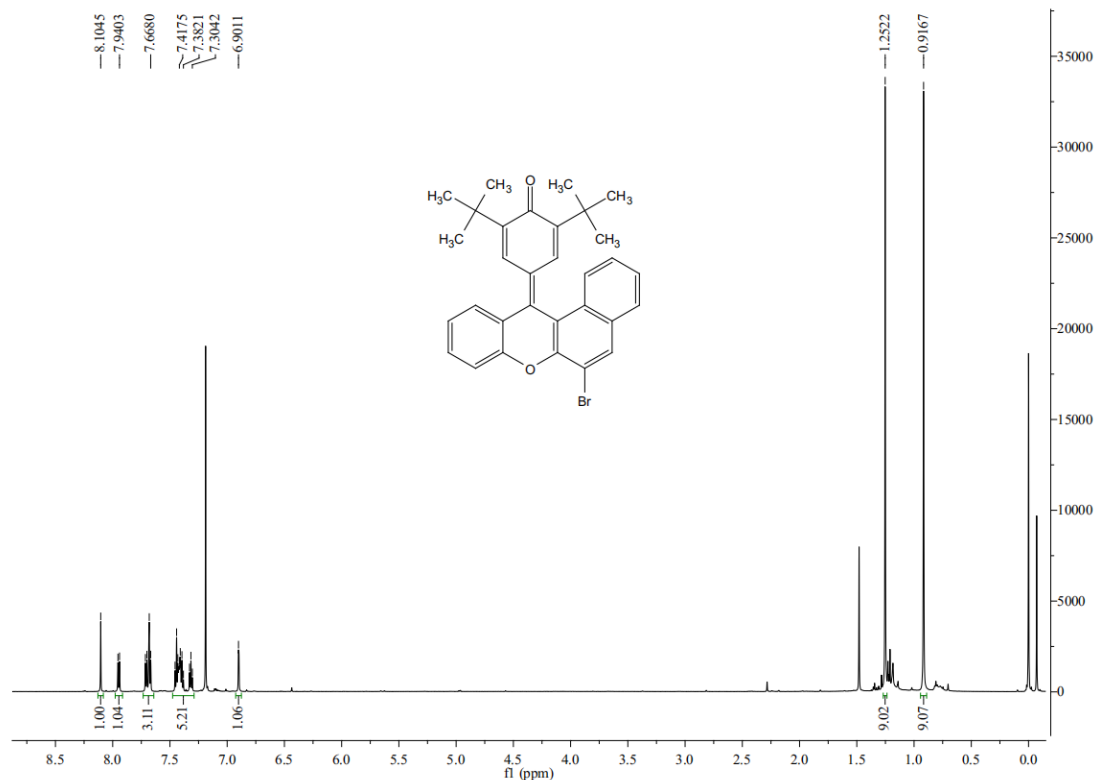

<sup>1</sup>H NMR Spectrum of **3d** (CDCl<sub>3</sub>, 600 MHz)

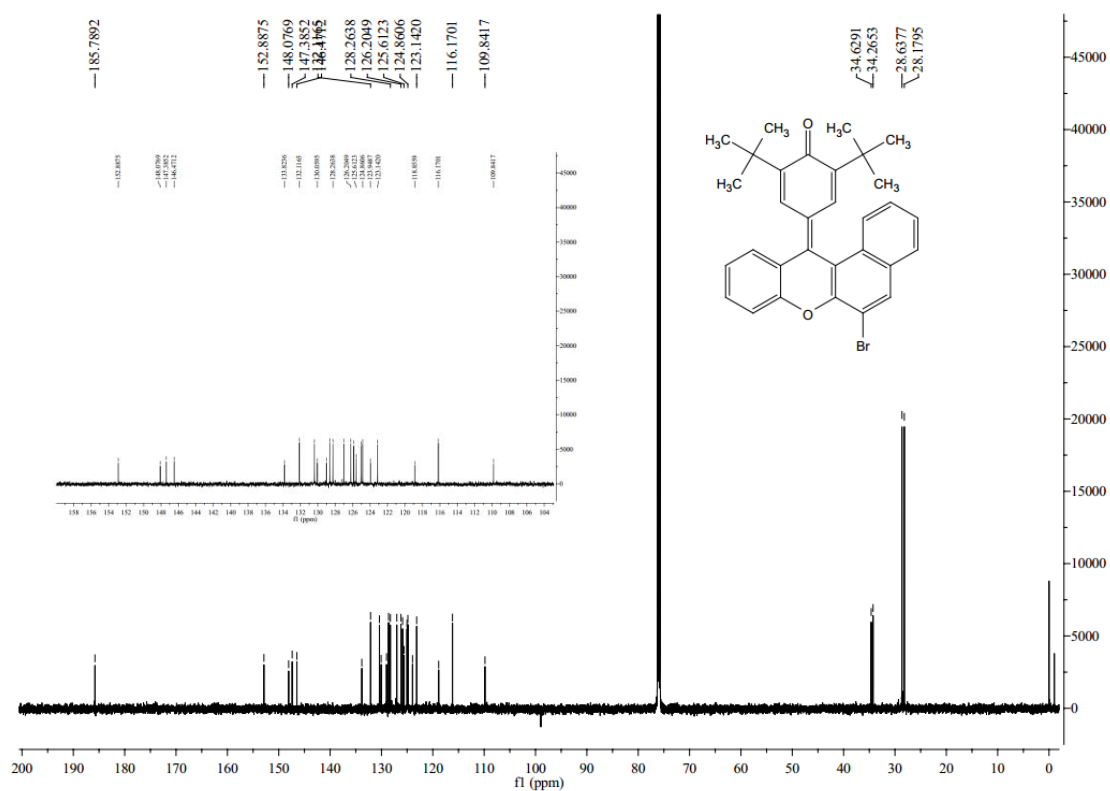

<sup>13</sup>C NMR Spectrum of **3d** (CDCl<sub>3</sub>, 150 MHz)

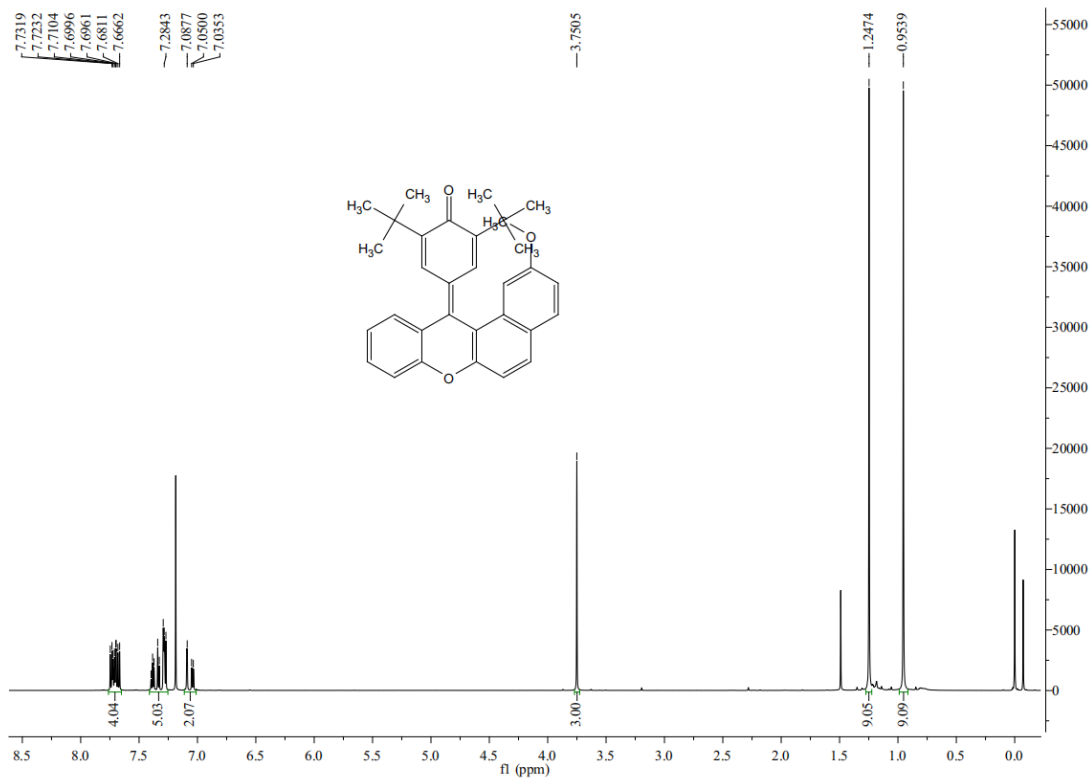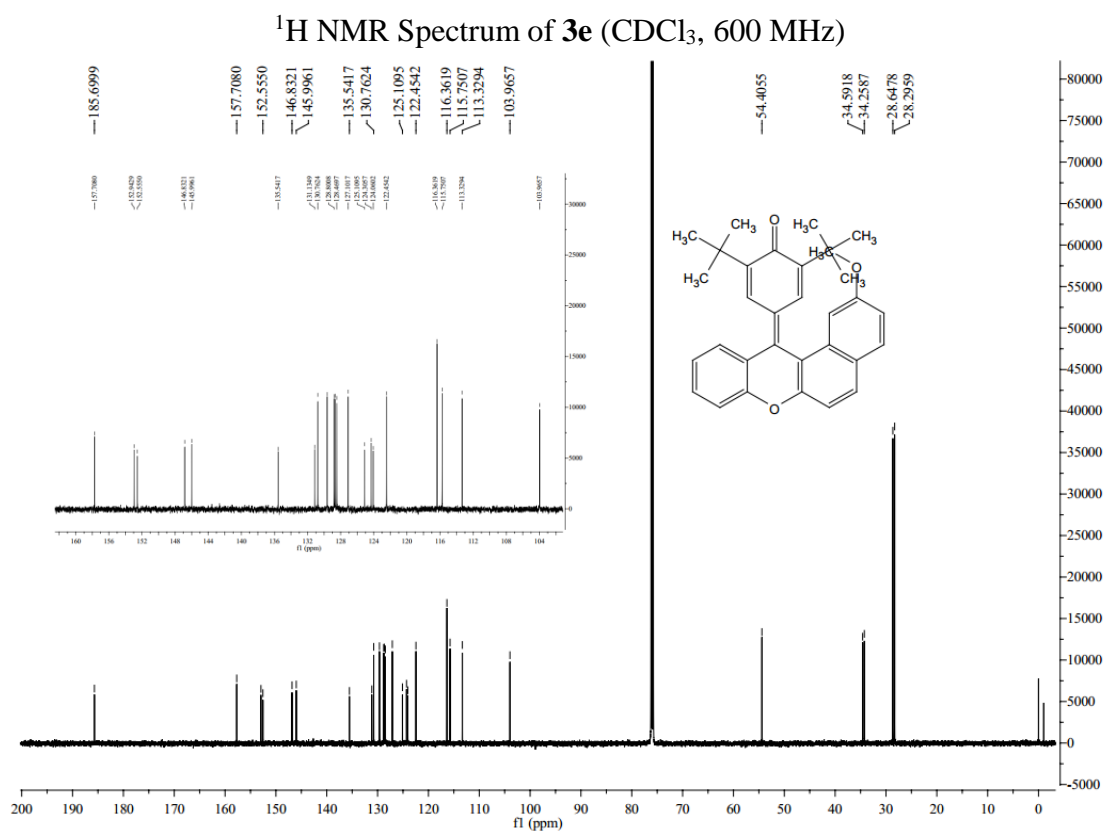

**<sup>13</sup>C NMR Spectrum of 3e (CDCl<sub>3</sub>, 150 MHz)**

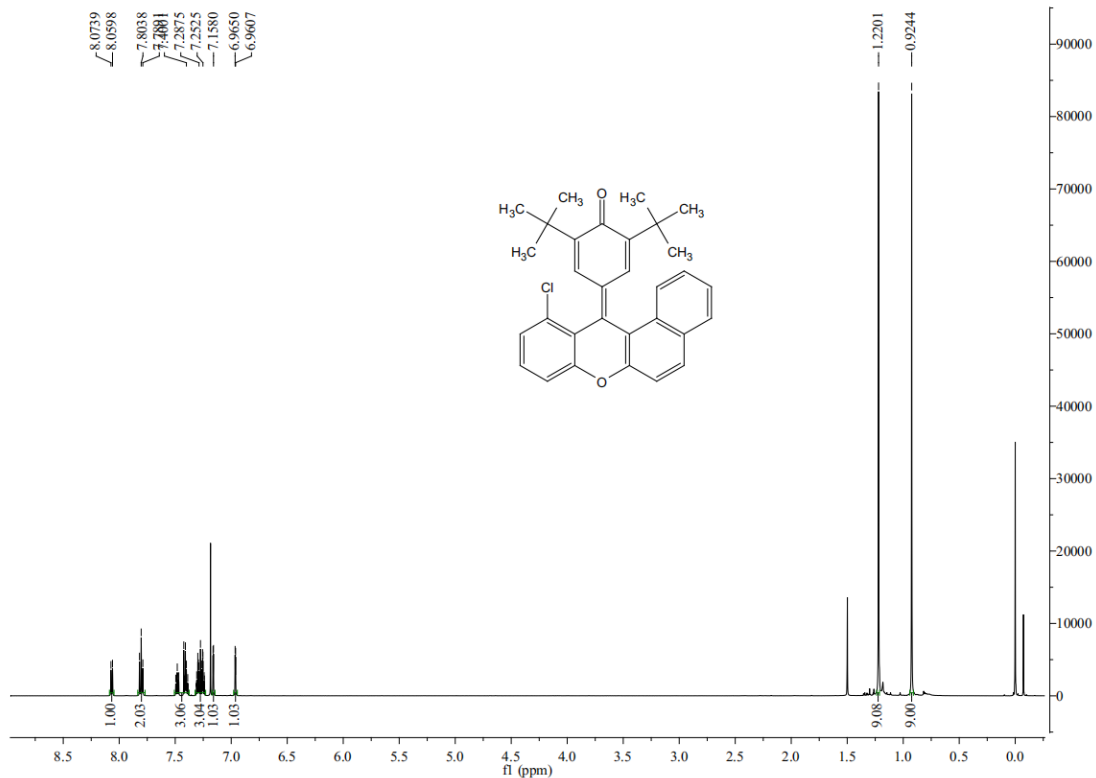

**<sup>1</sup>H NMR Spectrum of **3f** (CDCl<sub>3</sub>, 600 MHz)**

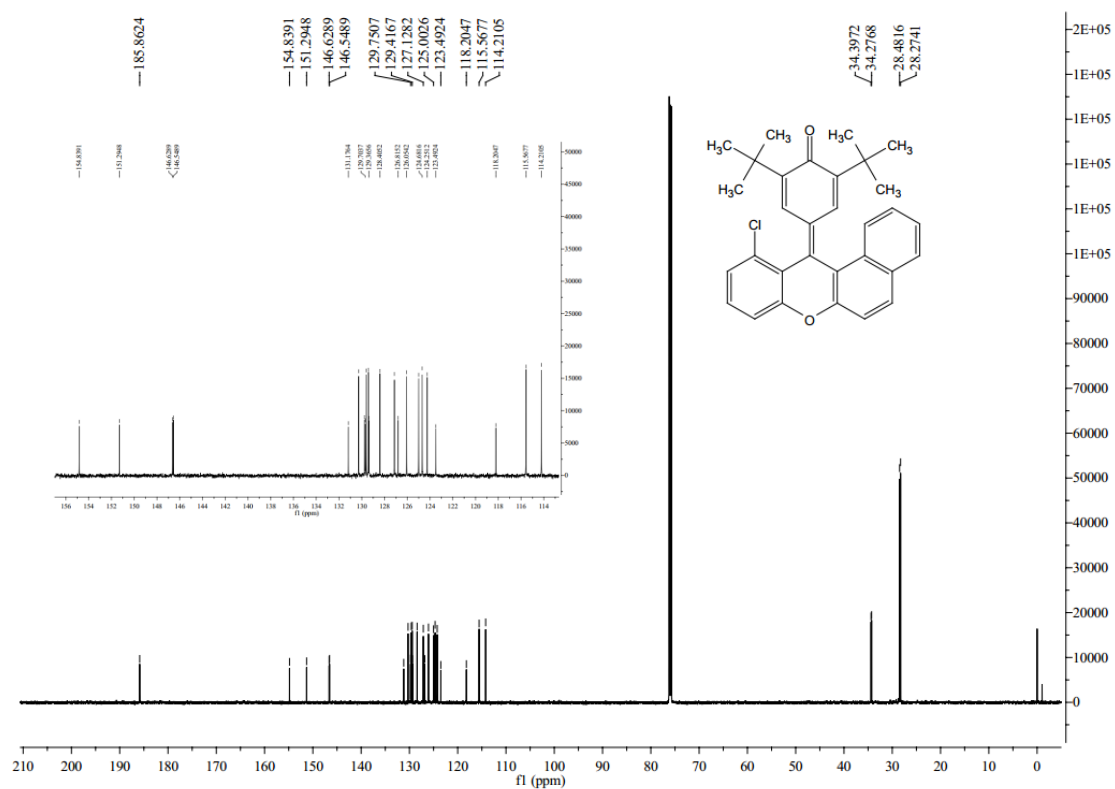

**<sup>13</sup>C NMR Spectrum of **3f** (CDCl<sub>3</sub>, 150 MHz)**



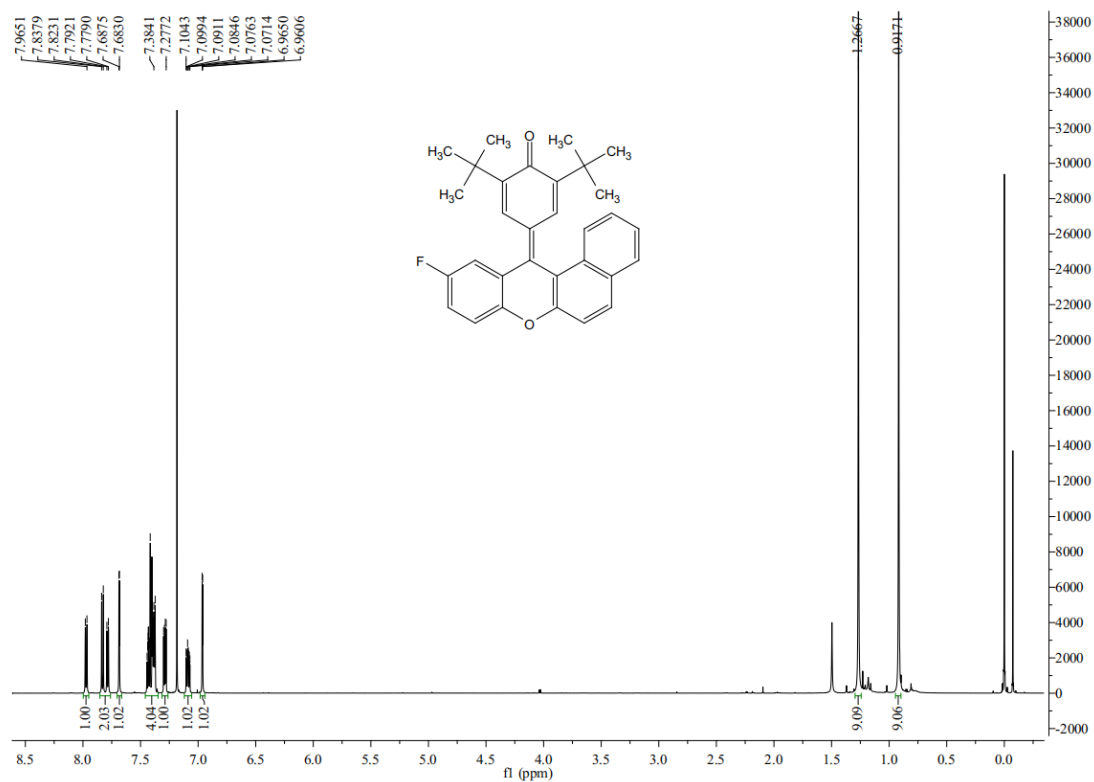

**<sup>1</sup>H NMR Spectrum of **3g** (CDCl<sub>3</sub>, 600 MHz)**

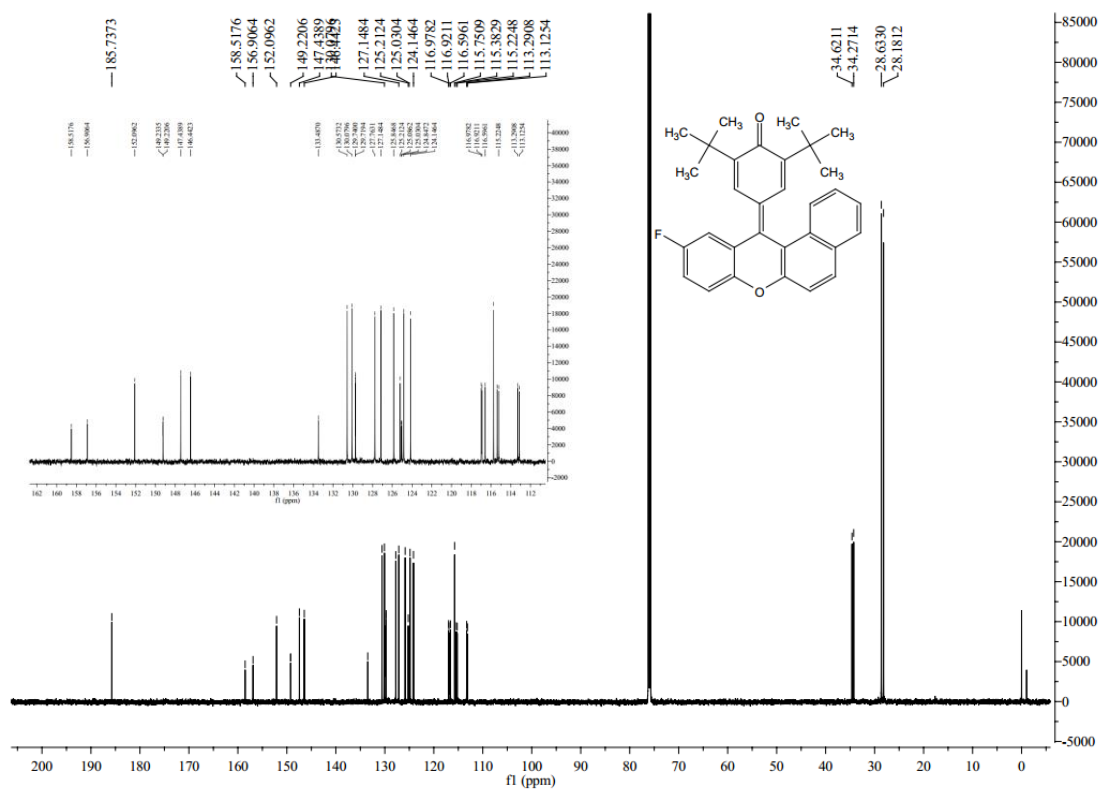

**<sup>13</sup>C NMR Spectrum of **3g** (CDCl<sub>3</sub>, 150 MHz)**

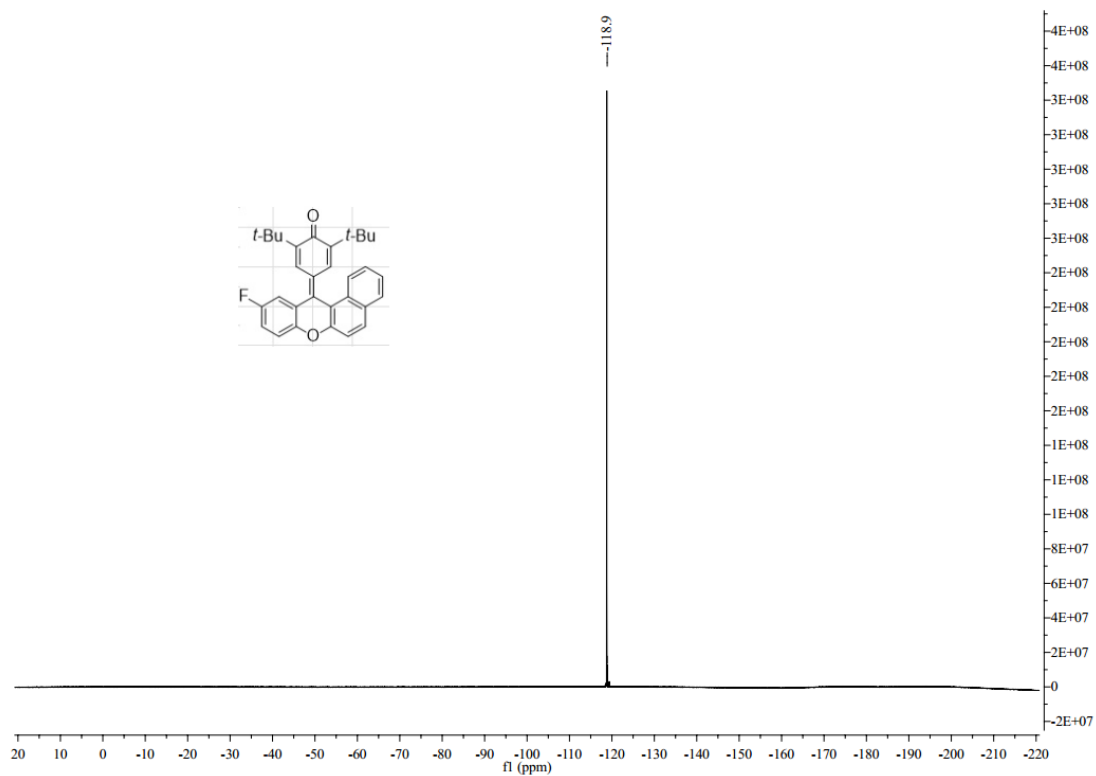

$^{19}\text{F}$  NMR Spectrum of **3g** ( $\text{CDCl}_3$ , 377 MHz)

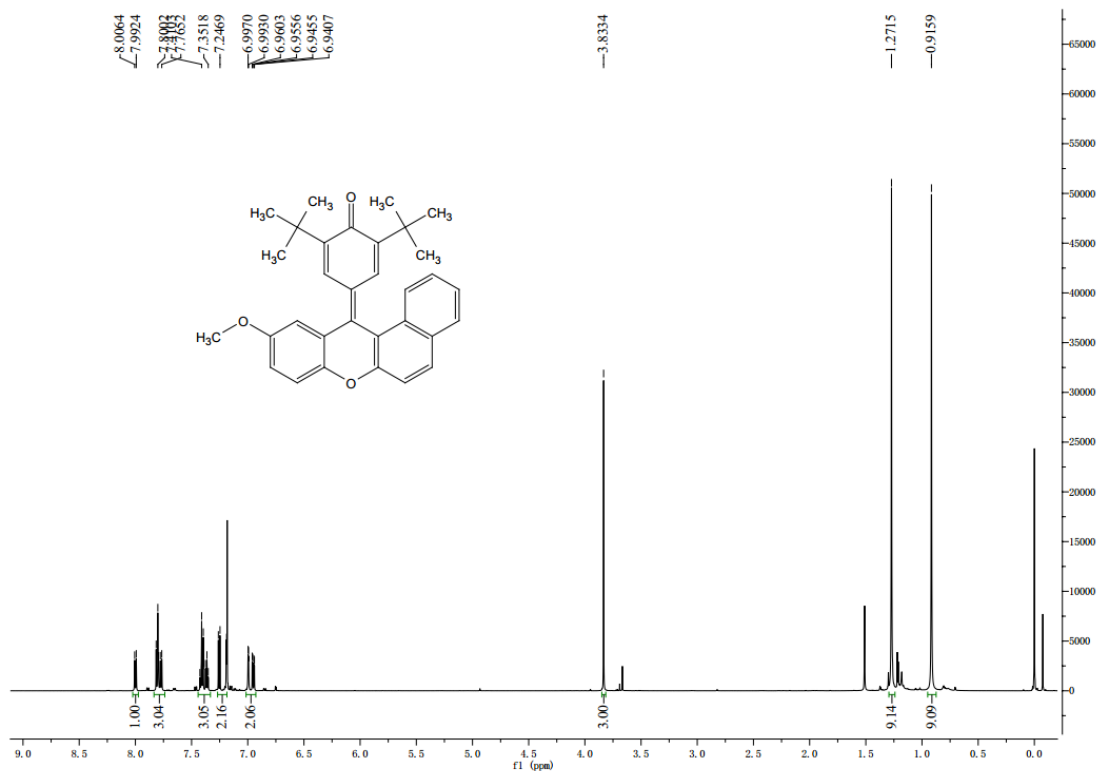

**<sup>1</sup>H NMR Spectrum of **3h** (CDCl<sub>3</sub>, 600 MHz)**

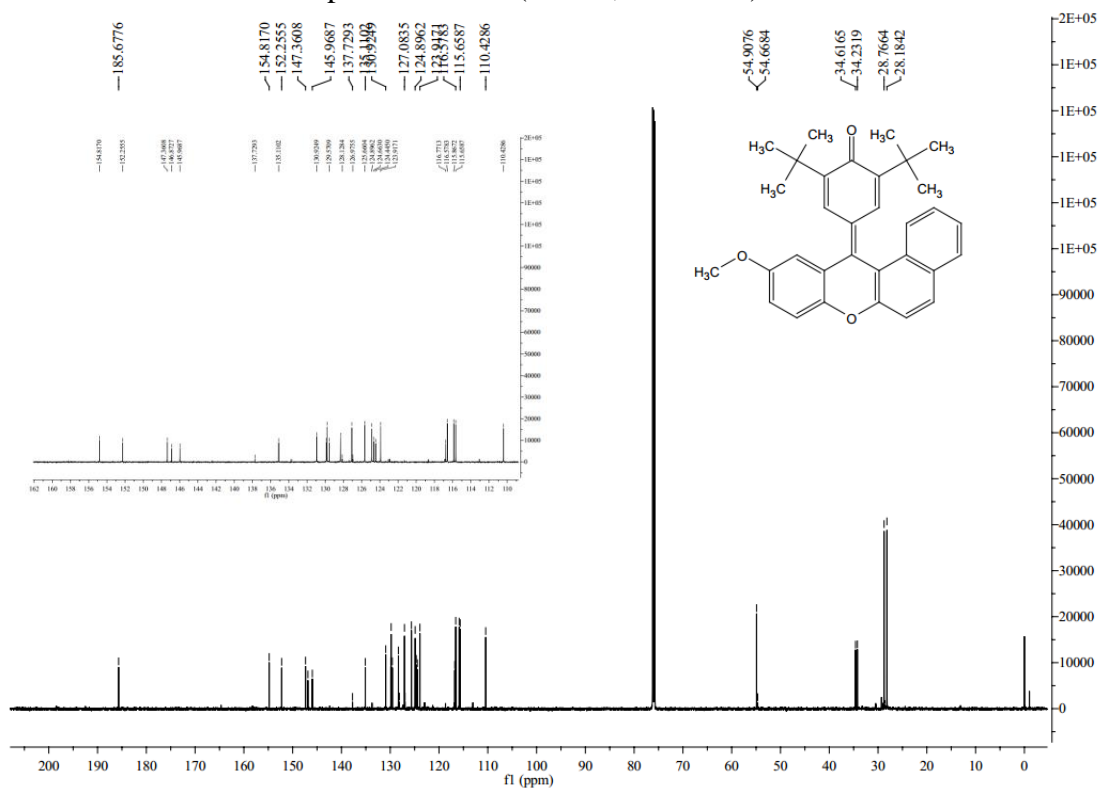

**<sup>13</sup>C NMR Spectrum of **3h** (CDCl<sub>3</sub>, 150 MHz)**

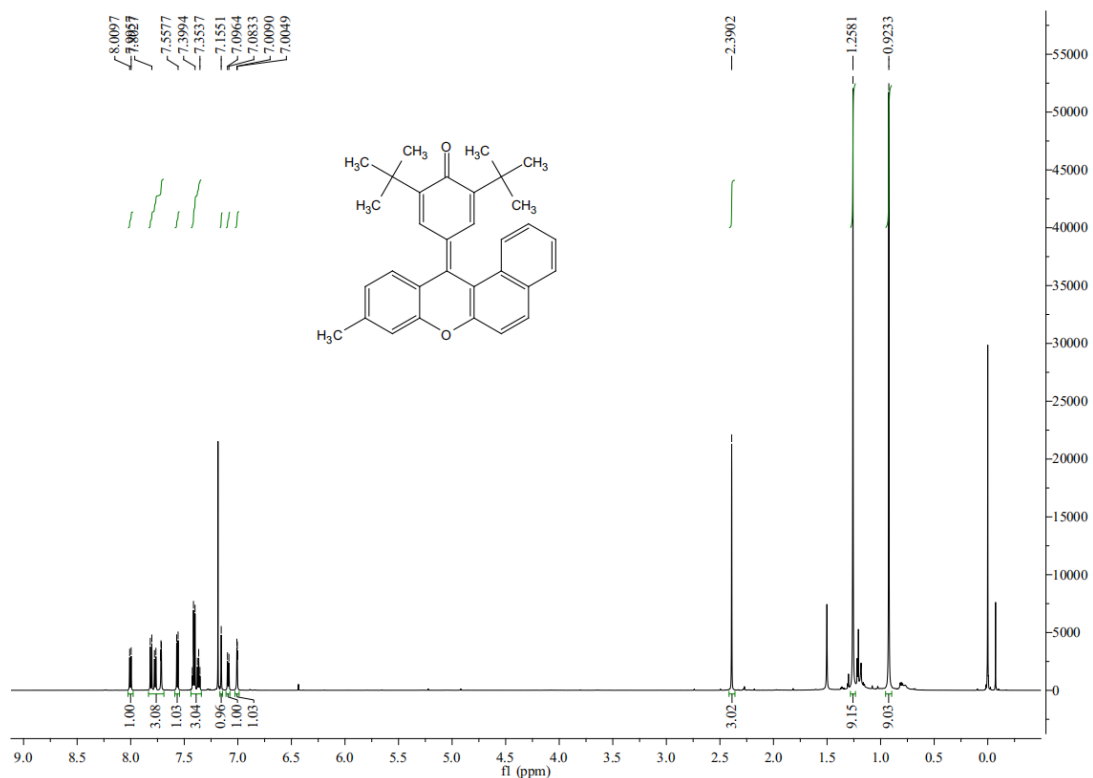

**<sup>1</sup>H NMR Spectrum of 3i (CDCl<sub>3</sub>, 600 MHz)**

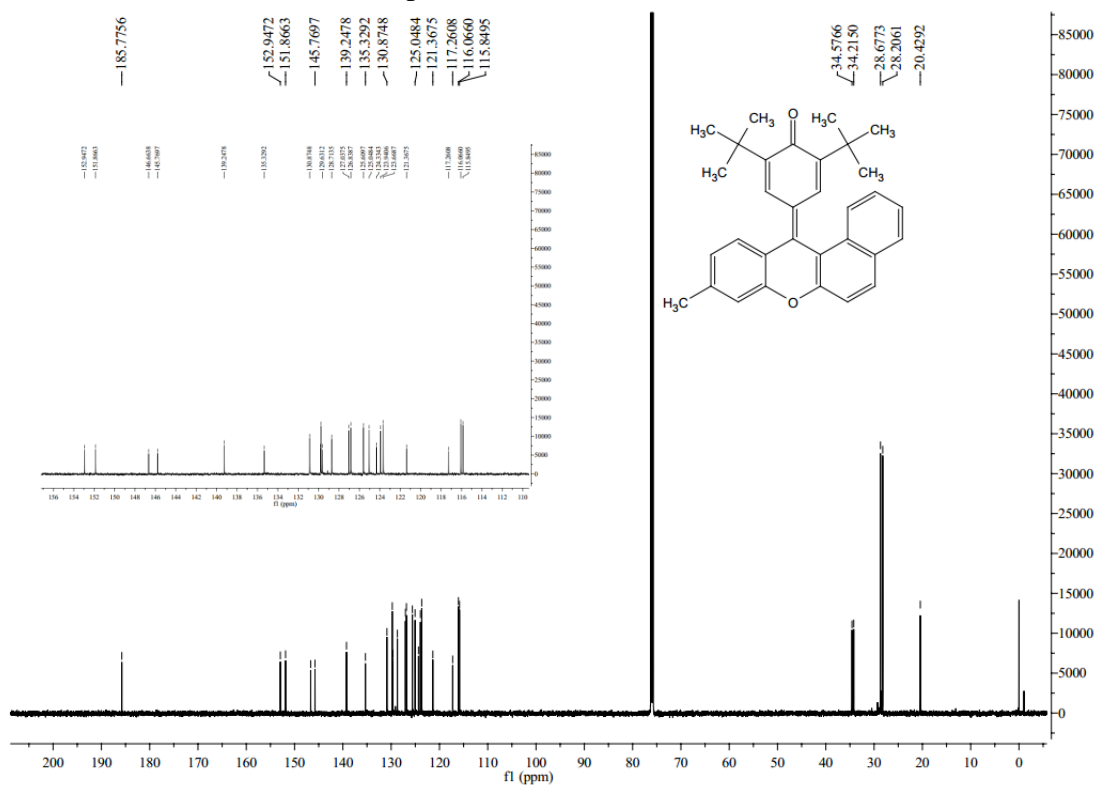

**<sup>13</sup>C NMR Spectrum of 3i (CDCl<sub>3</sub>, 150 MHz)**

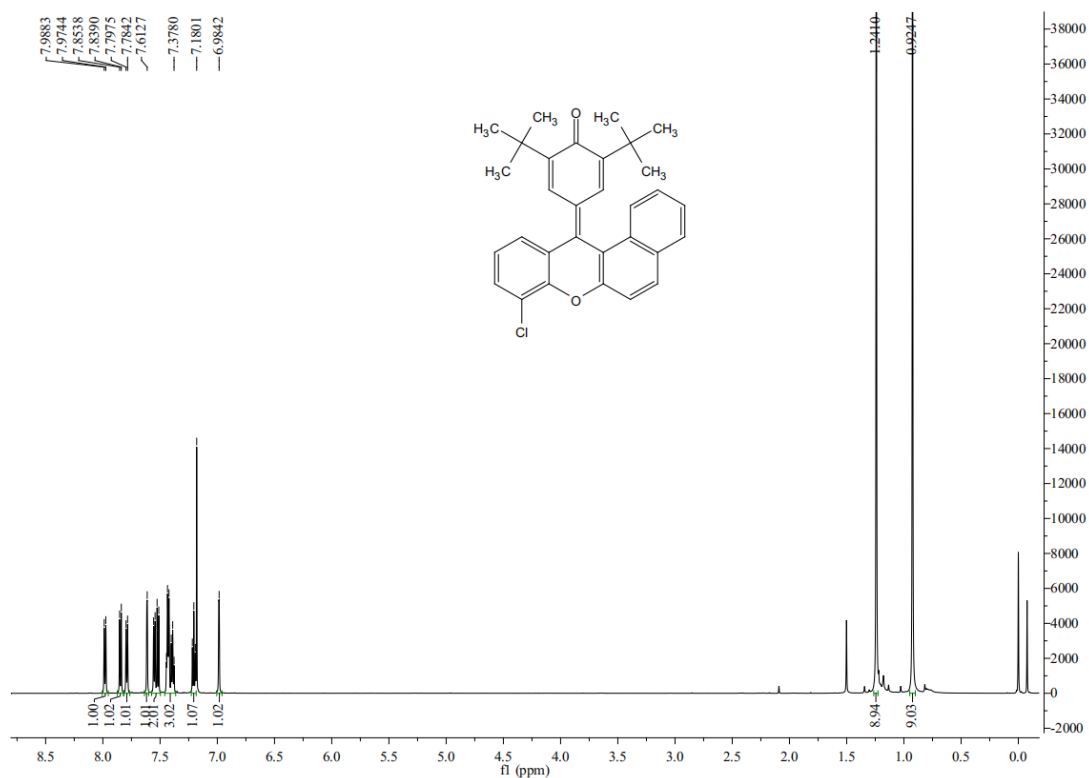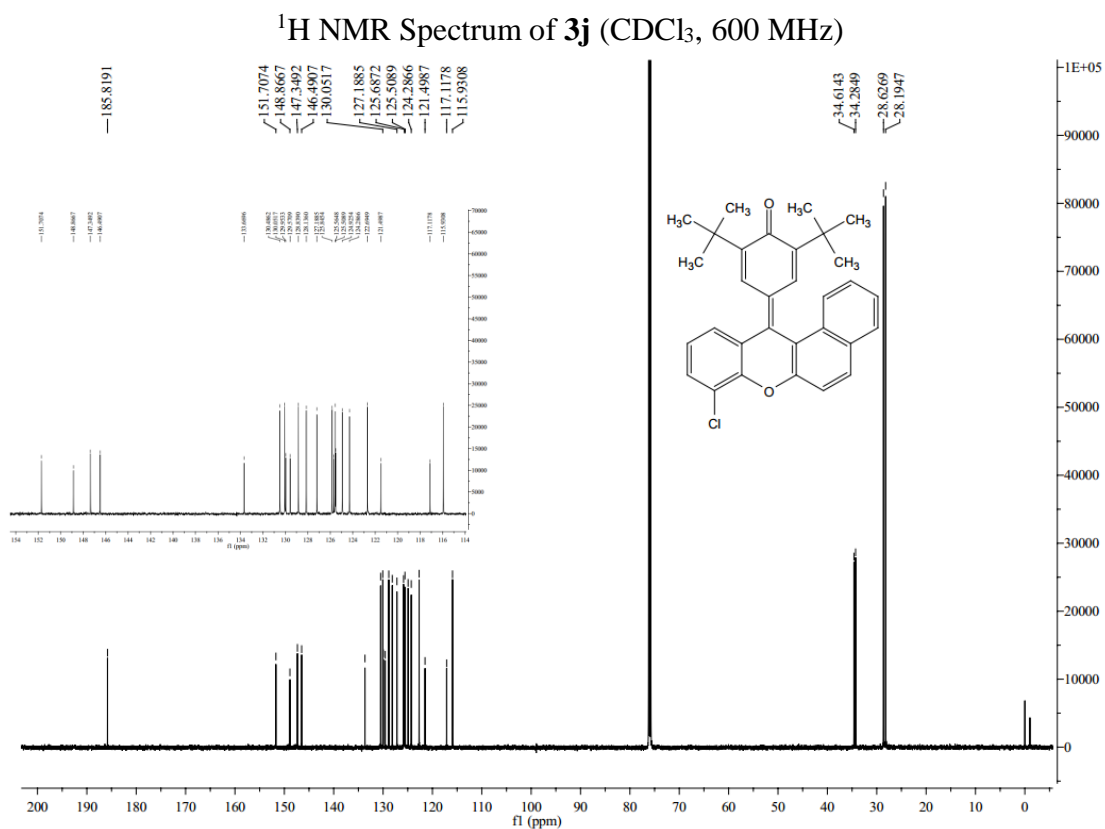

**<sup>13</sup>C NMR Spectrum of 3j (CDCl<sub>3</sub>, 150 MHz)**

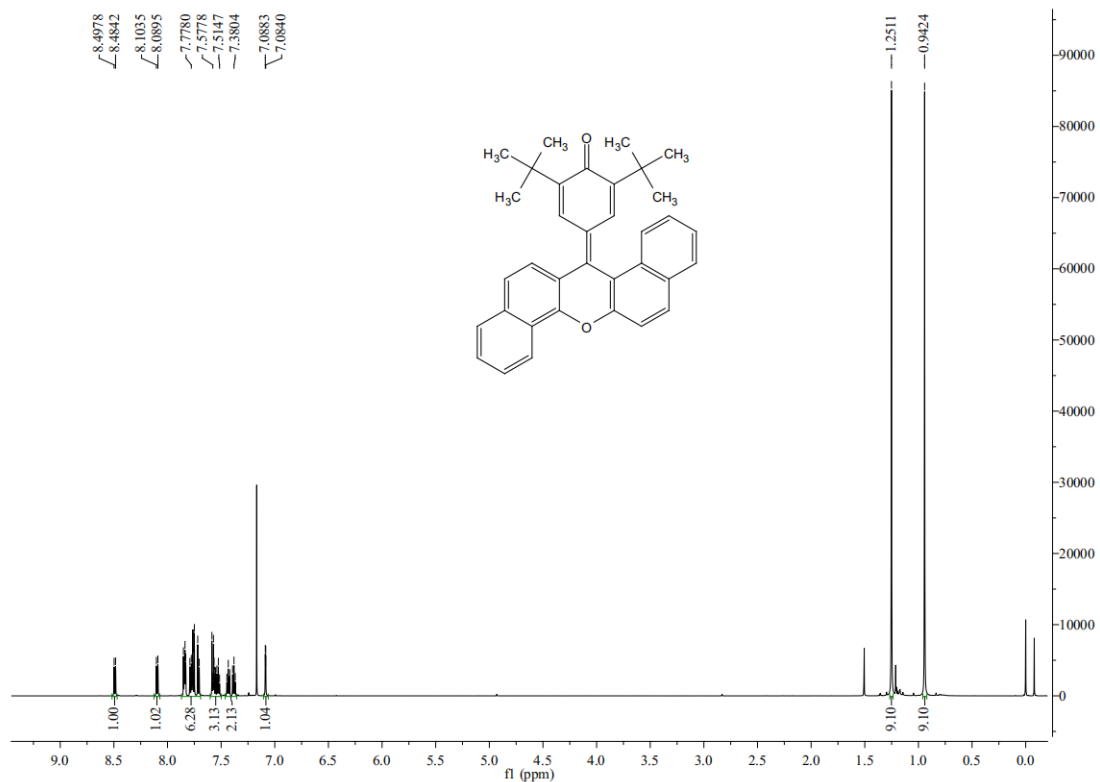

<sup>1</sup>H NMR Spectrum of **3k** (CDCl<sub>3</sub>, 600 MHz)

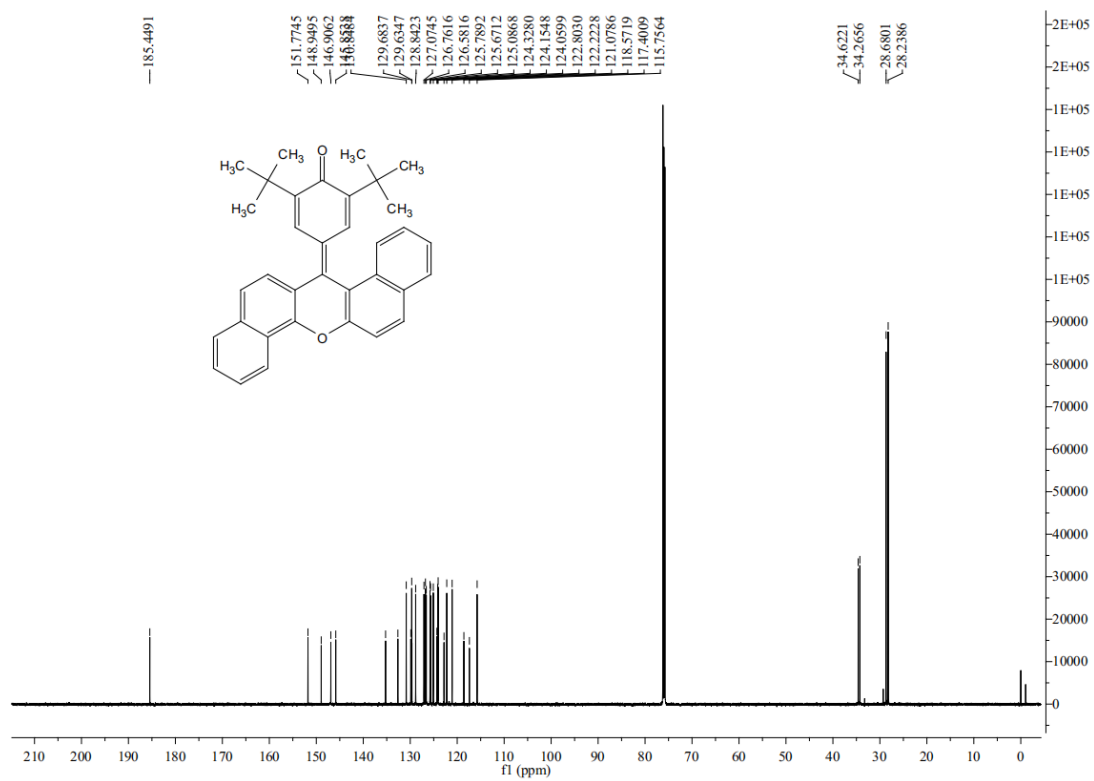

<sup>13</sup>C NMR Spectrum of **3k** (CDCl<sub>3</sub>, 150 MHz)

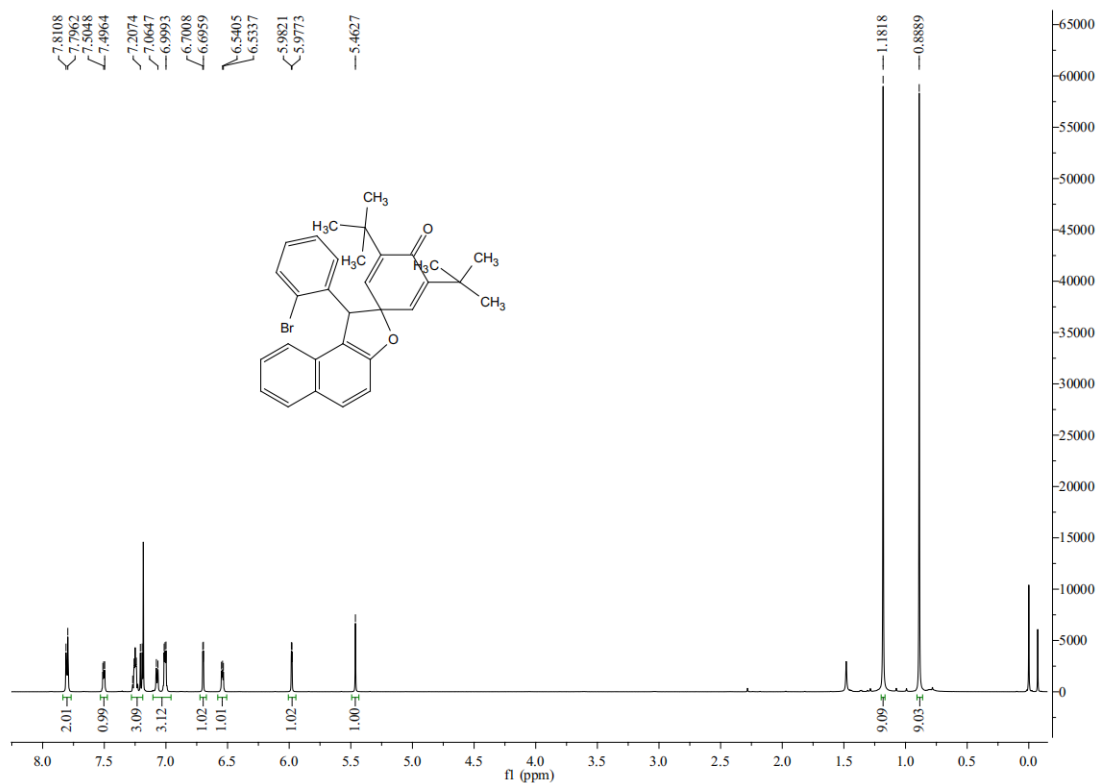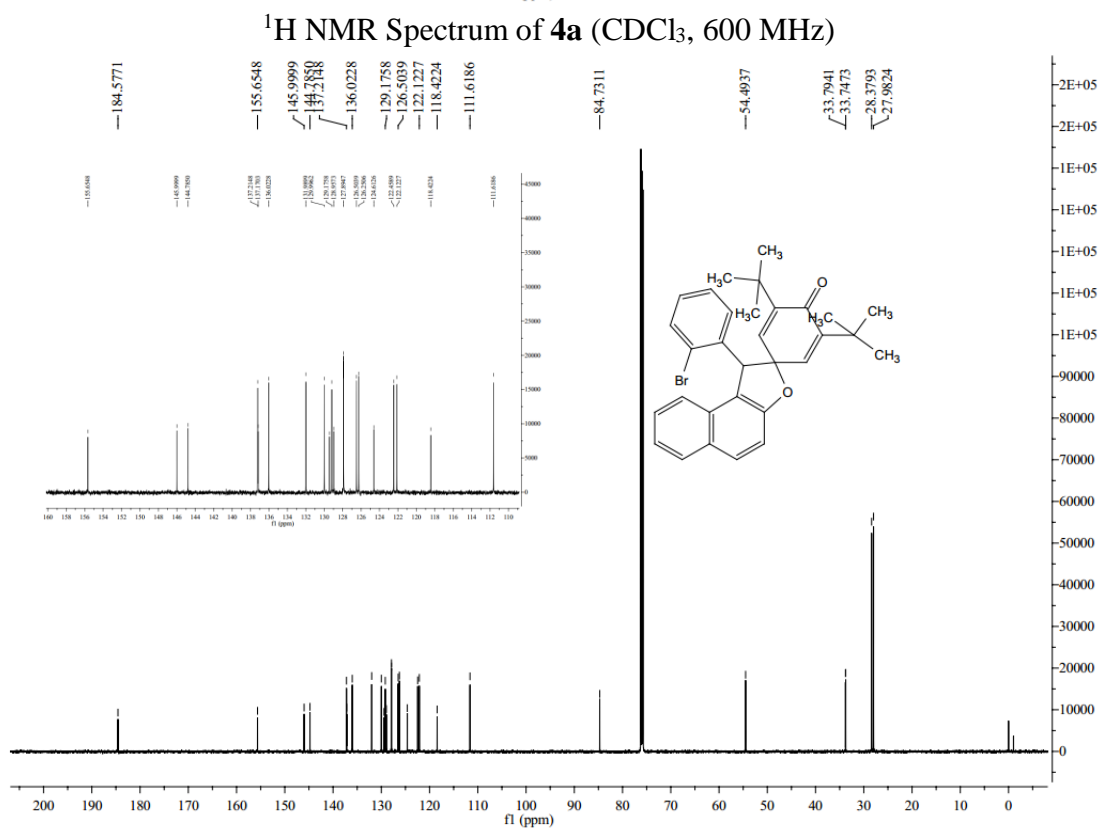

**<sup>13</sup>C NMR Spectrum of 4a (CDCl<sub>3</sub>, 150 MHz)**

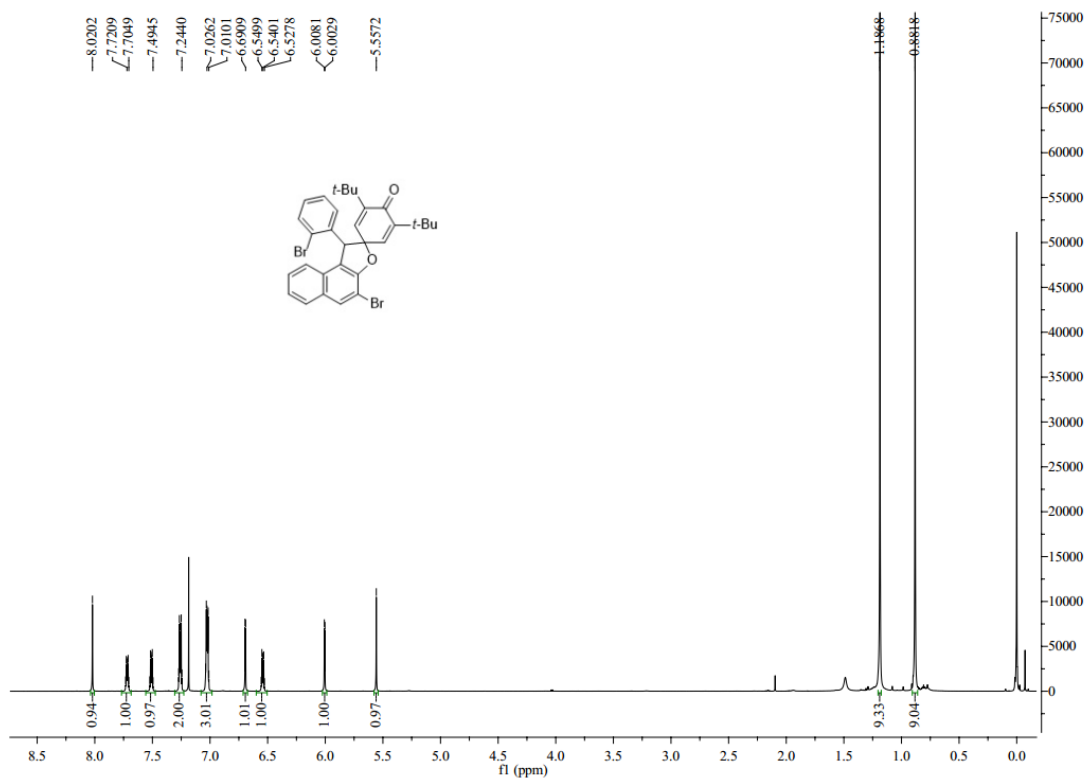

<sup>1</sup>H NMR Spectrum of **4b** (CDCl<sub>3</sub>, 600 MHz)

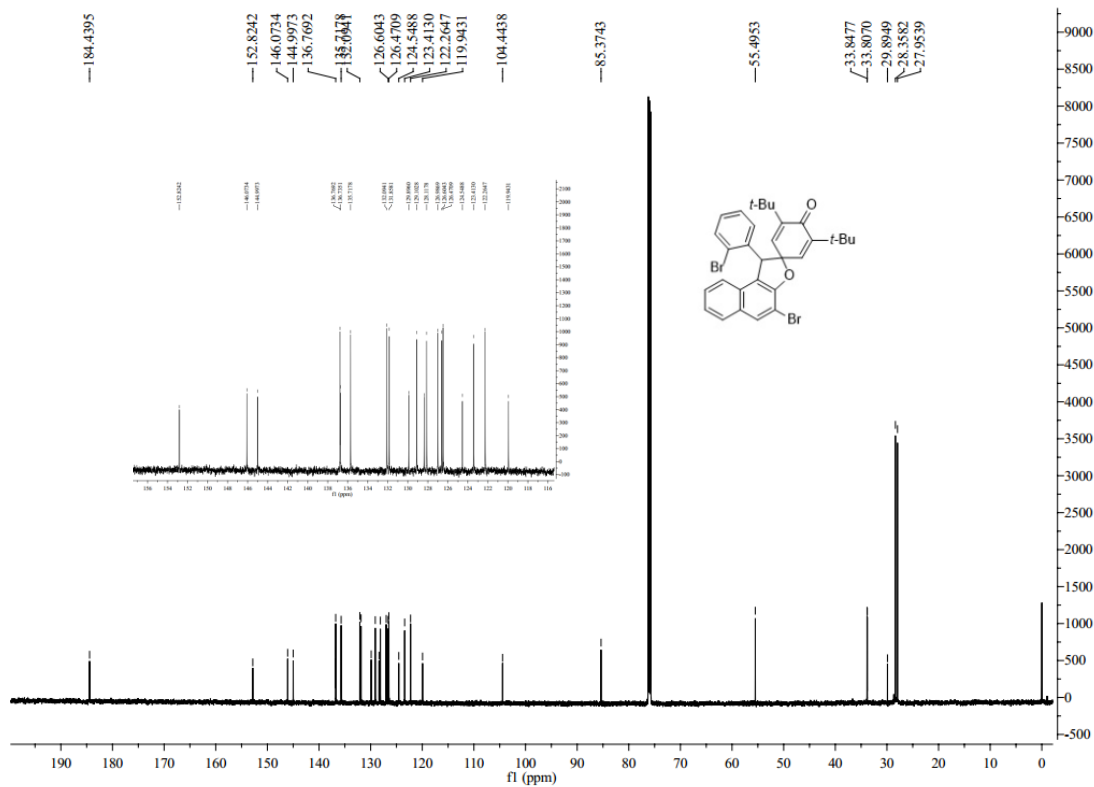

<sup>13</sup>C NMR Spectrum of **4b** (CDCl<sub>3</sub>, 150 MHz)



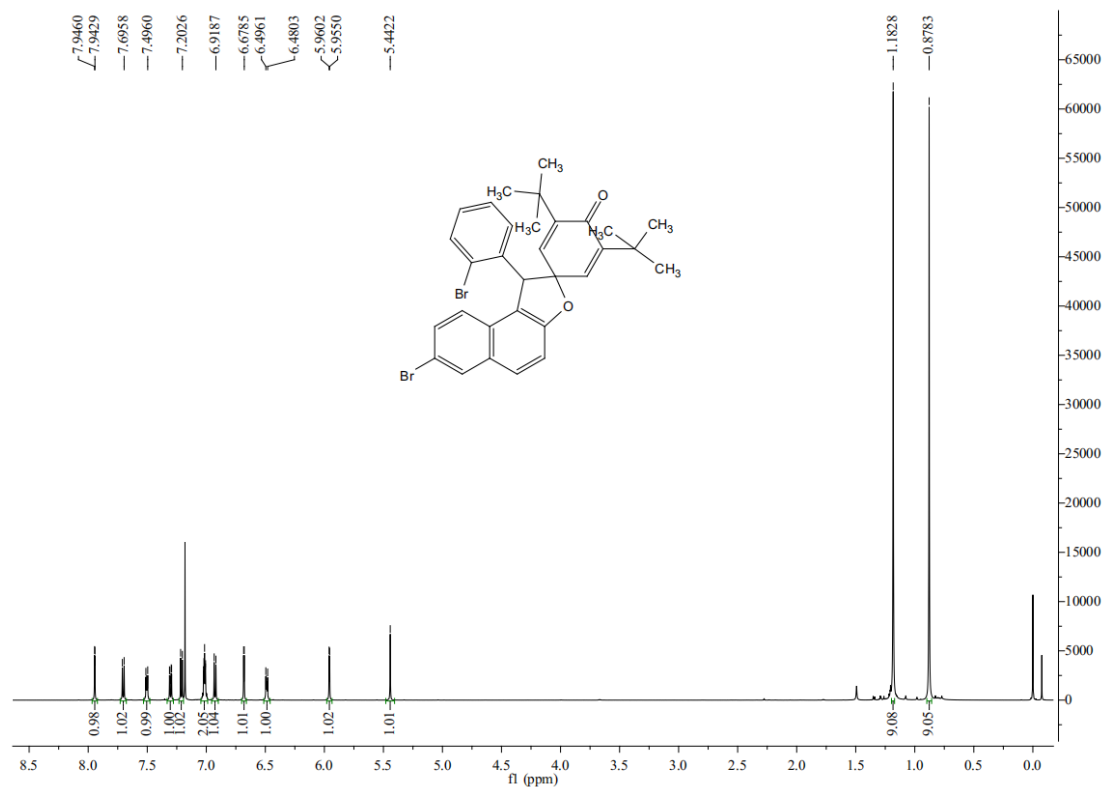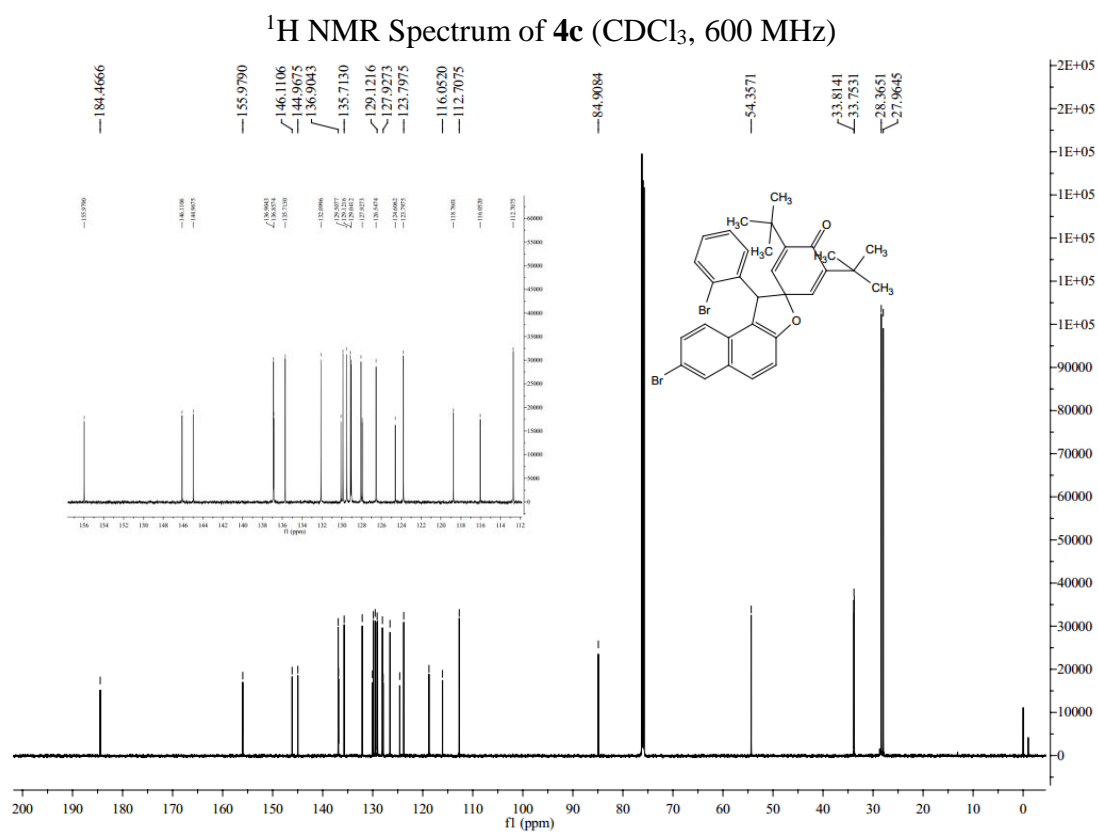

**<sup>13</sup>C NMR Spectrum of 4c (CDCl<sub>3</sub>, 150 MHz)**

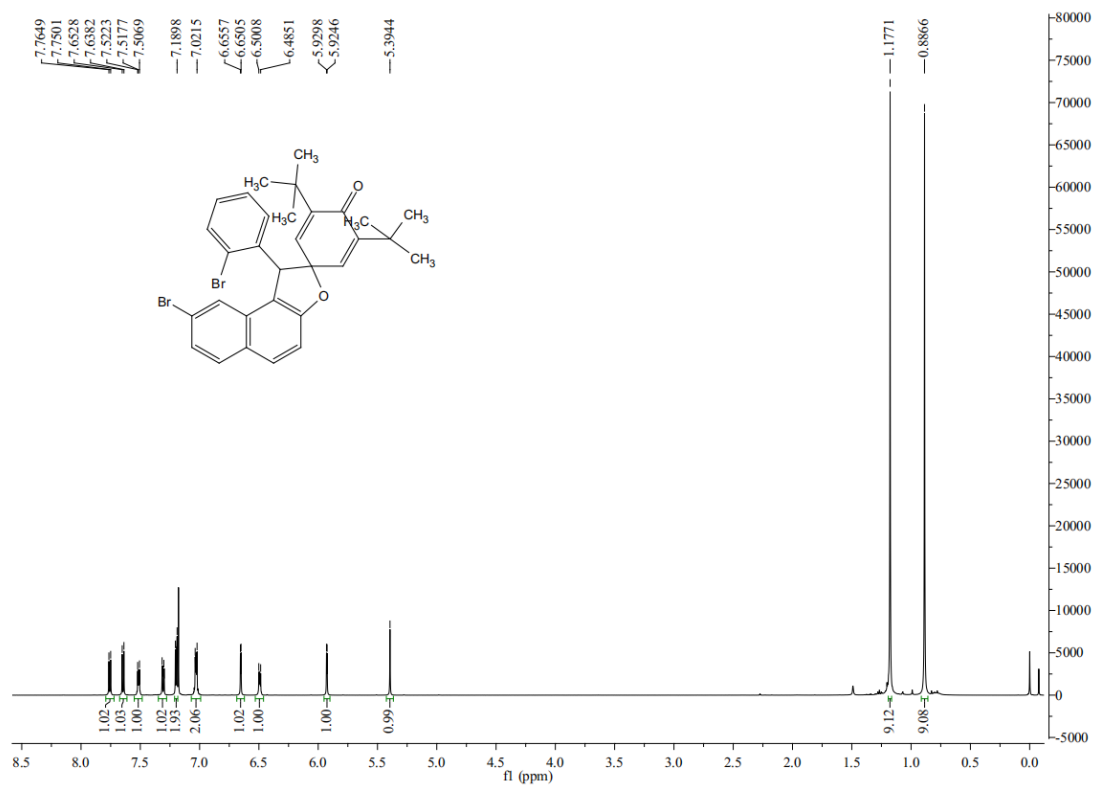

**<sup>1</sup>H NMR Spectrum of **4d** (CDCl<sub>3</sub>, 600 MHz)**

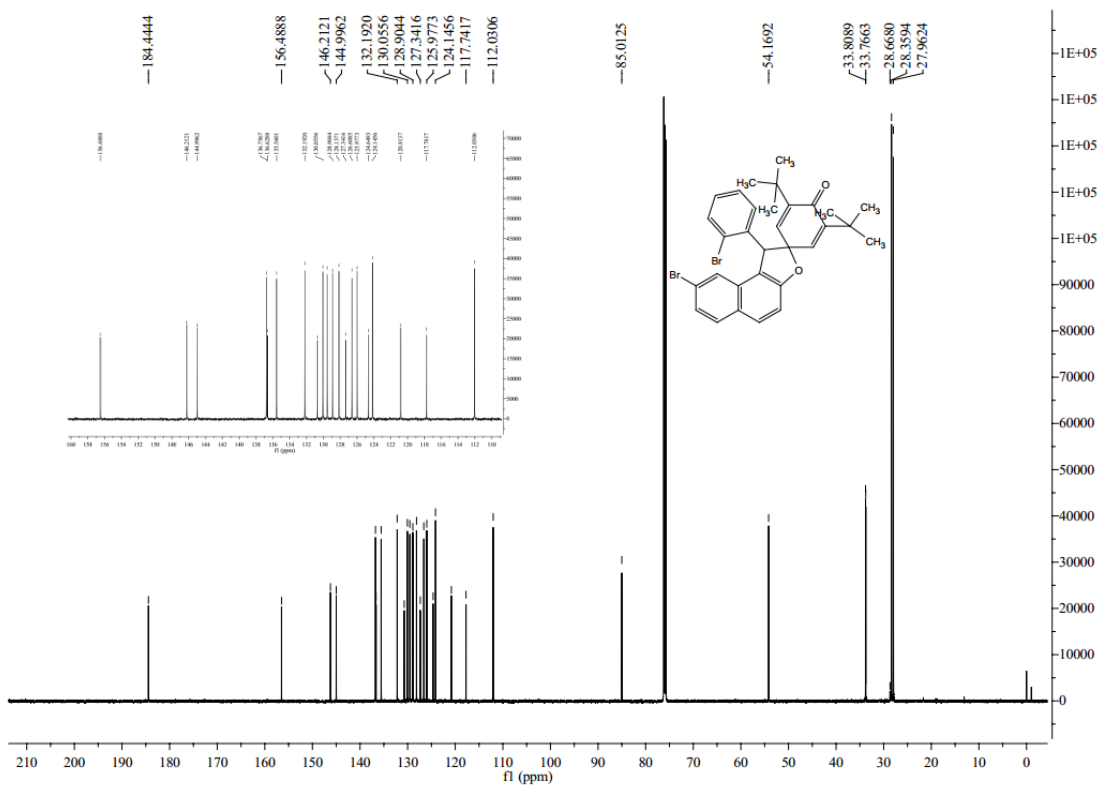

**<sup>13</sup>C NMR Spectrum of **4d** (CDCl<sub>3</sub>, 150 MHz)**

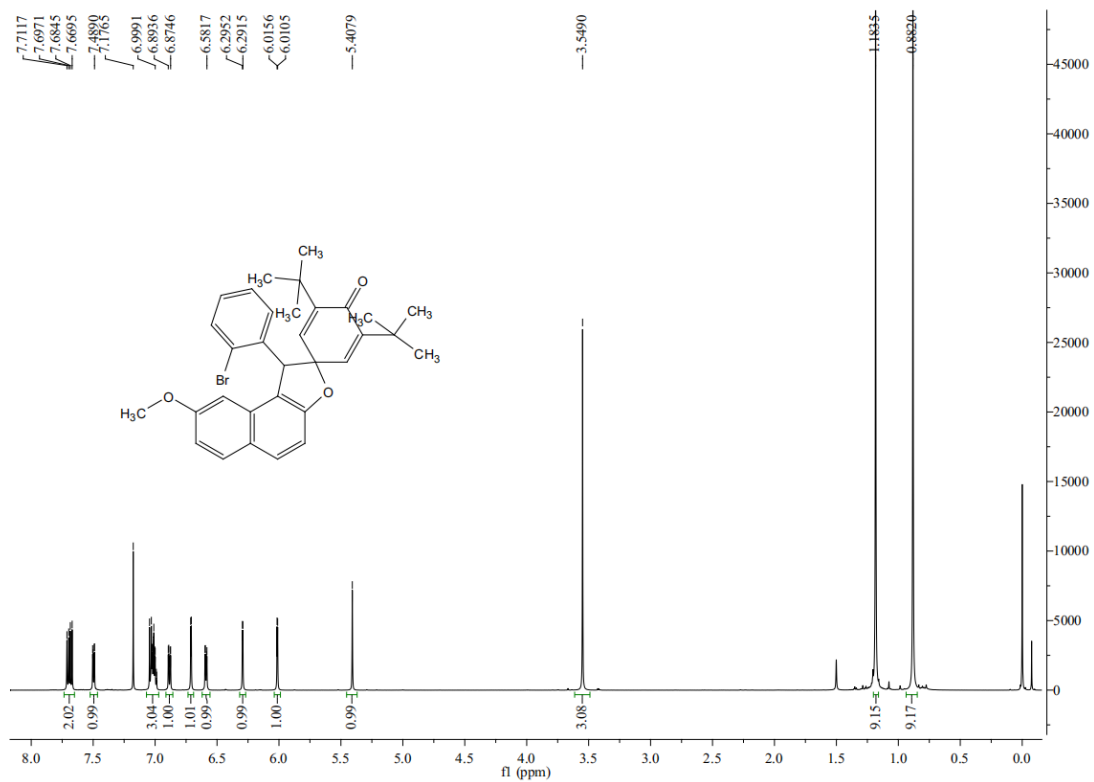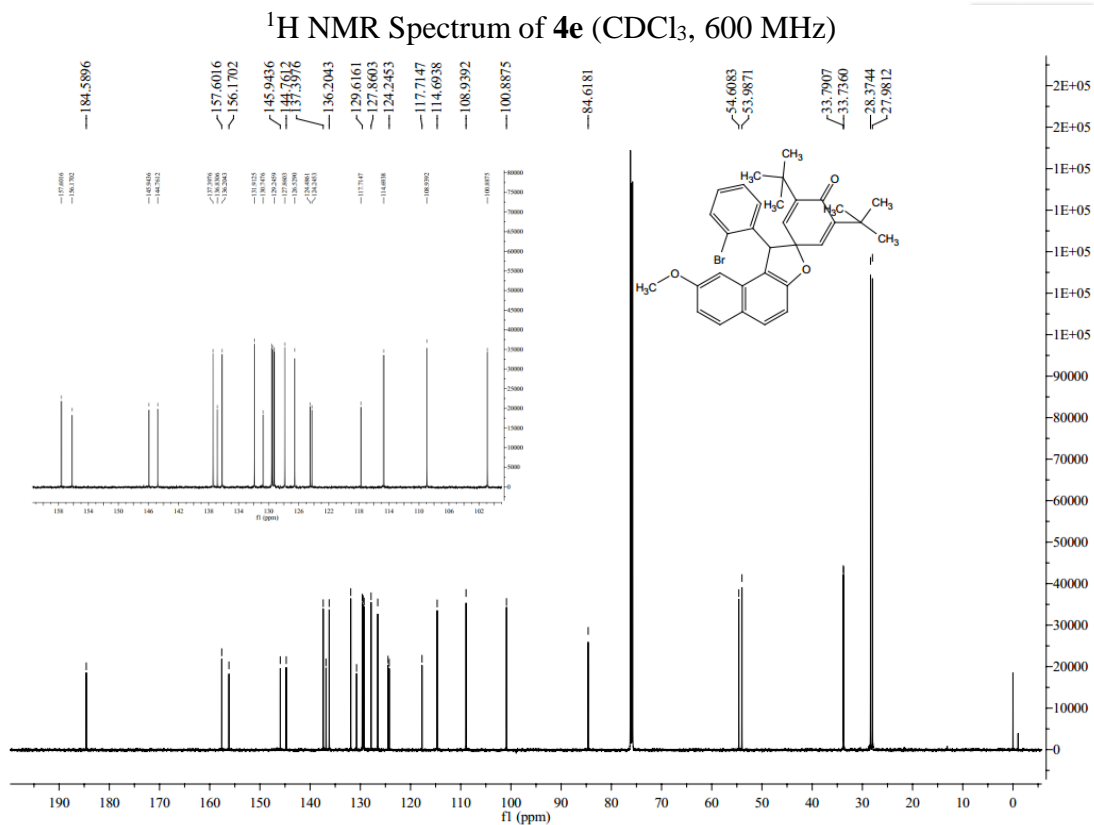

**<sup>13</sup>C NMR Spectrum of 4e (CDCl<sub>3</sub>, 150 MHz)**

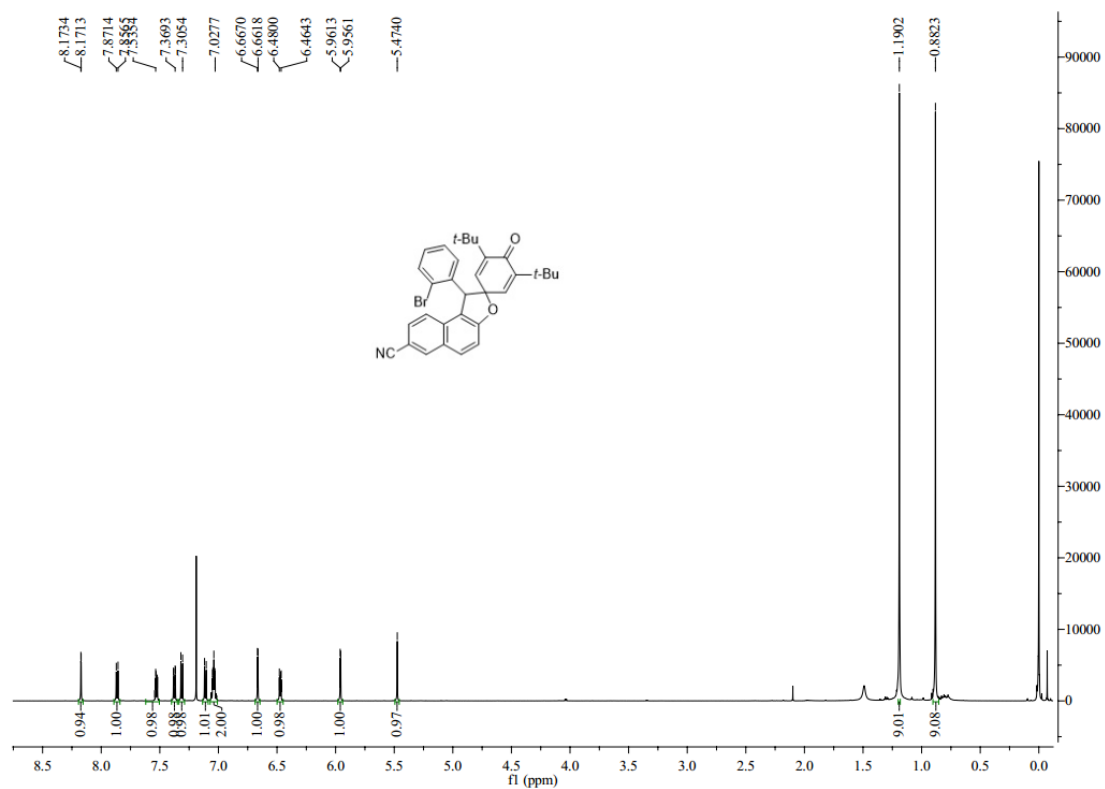

<sup>1</sup>H NMR Spectrum of **4f** (CDCl<sub>3</sub>, 600 MHz)

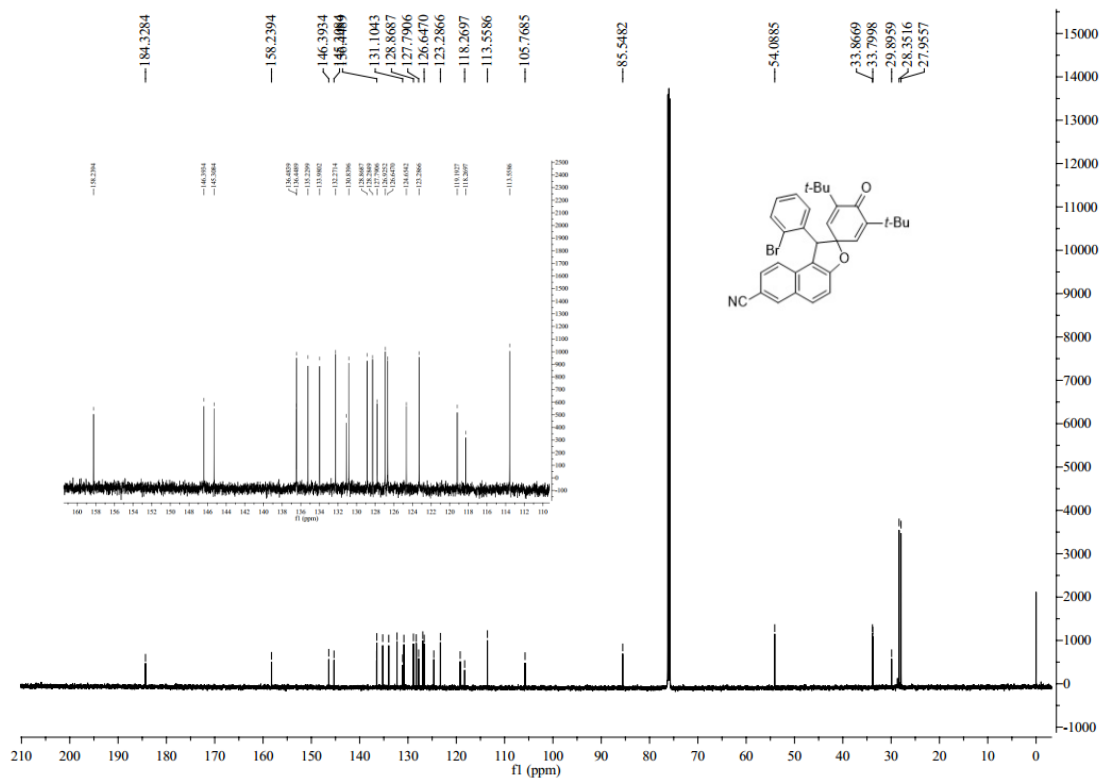

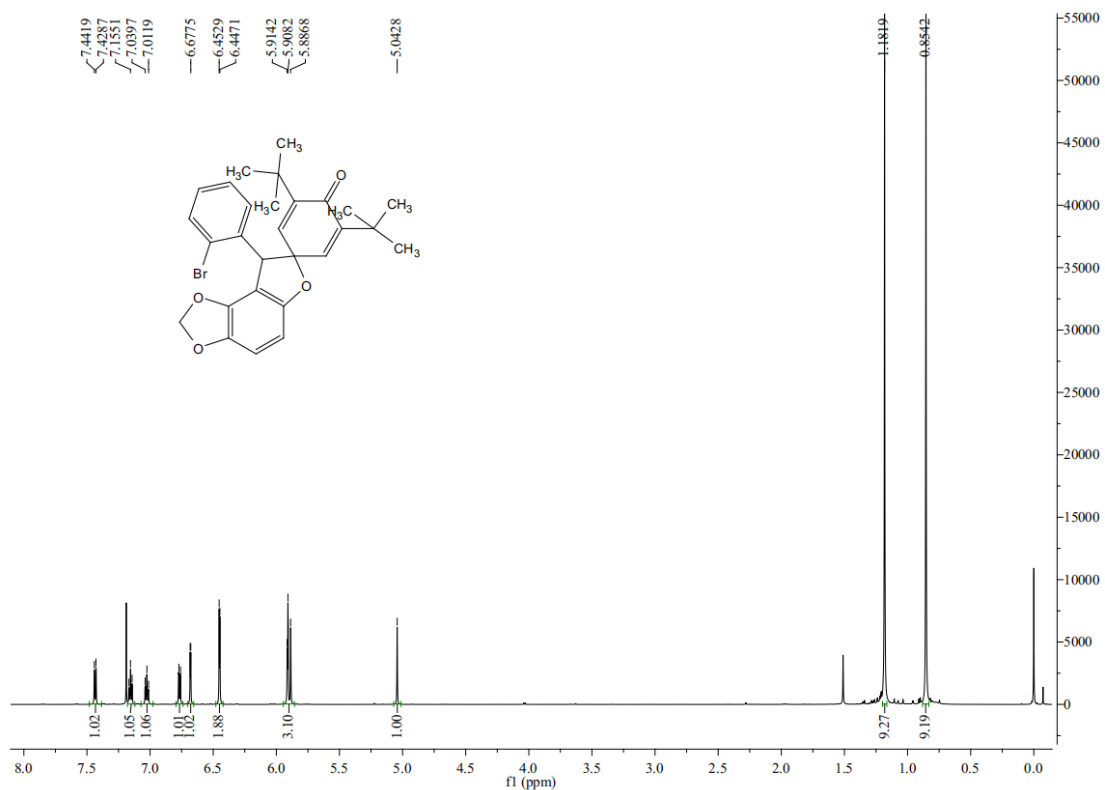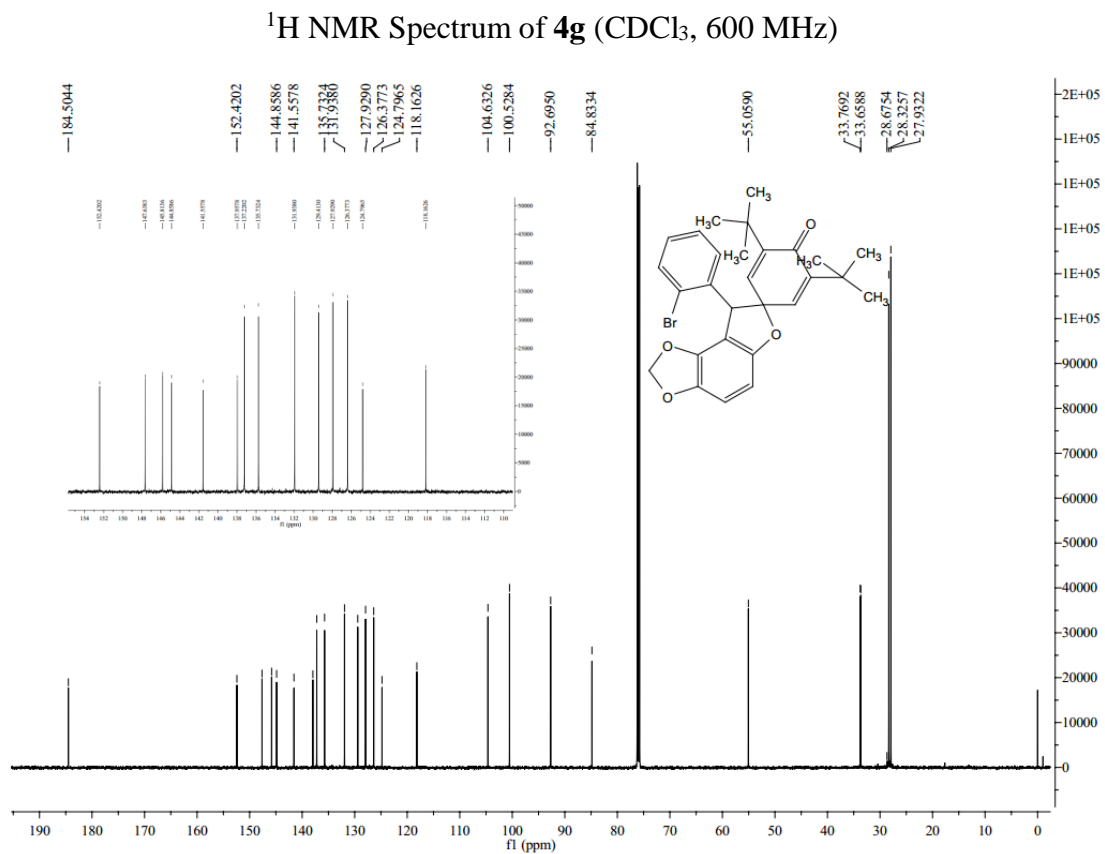

<sup>13</sup>C NMR Spectrum of **4g** (CDCl<sub>3</sub>, 150 MHz)

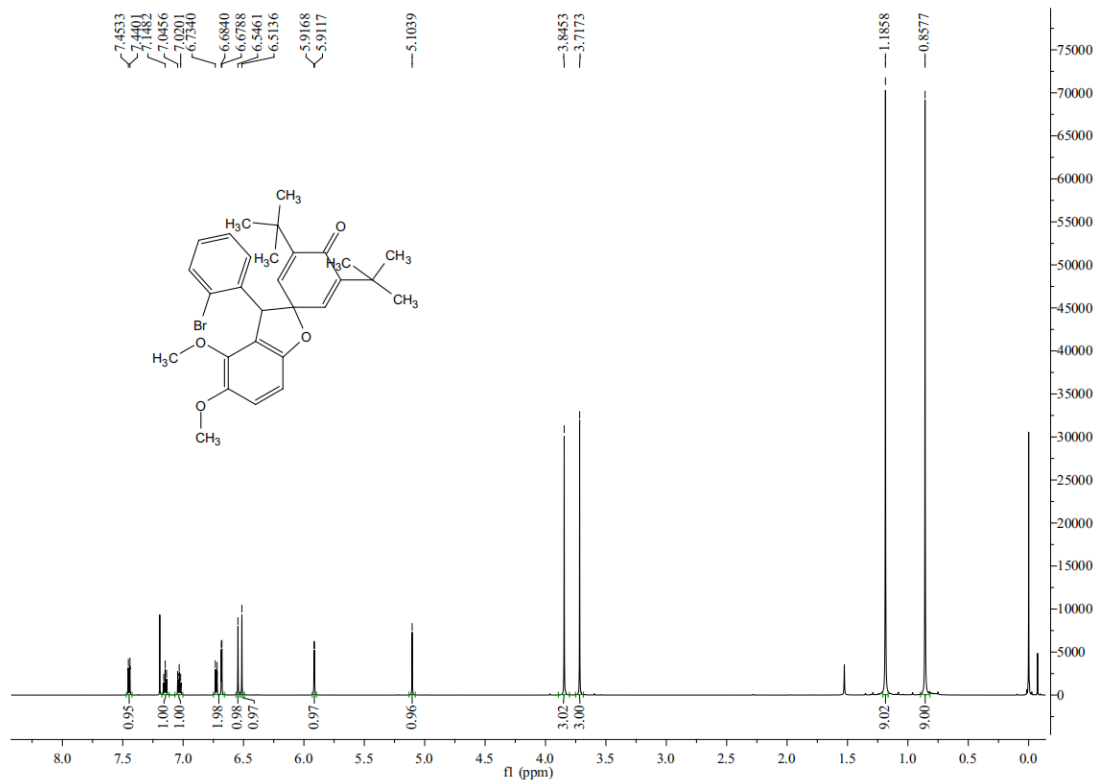

**<sup>1</sup>H NMR Spectrum of 4h (CDCl<sub>3</sub>, 600 MHz)**

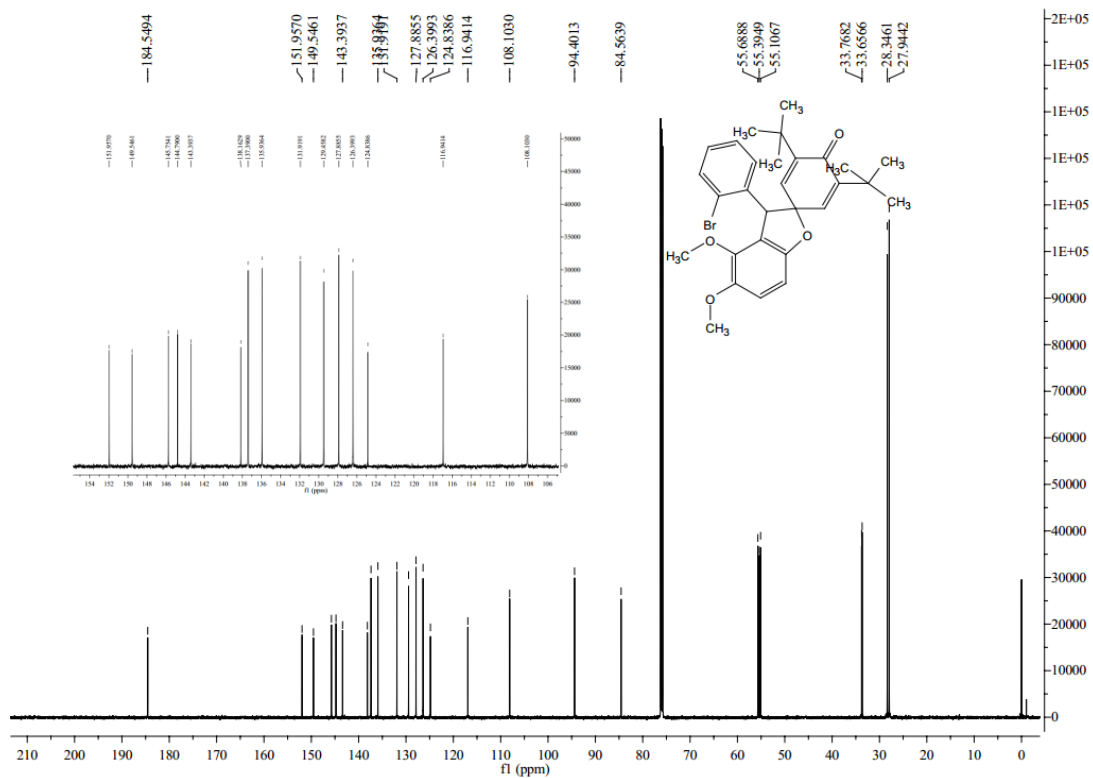

**<sup>13</sup>C NMR Spectrum of 4h (CDCl<sub>3</sub>, 150 MHz)**

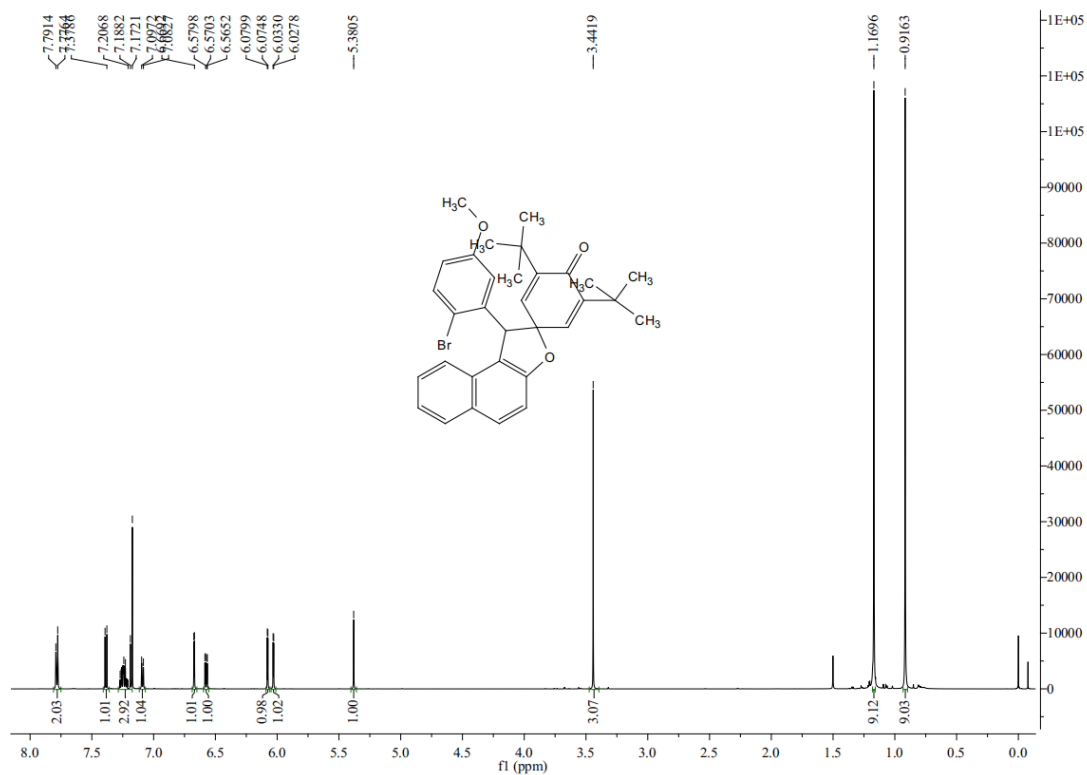

<sup>1</sup>H NMR Spectrum of **4i** (CDCl<sub>3</sub>, 600 MHz)

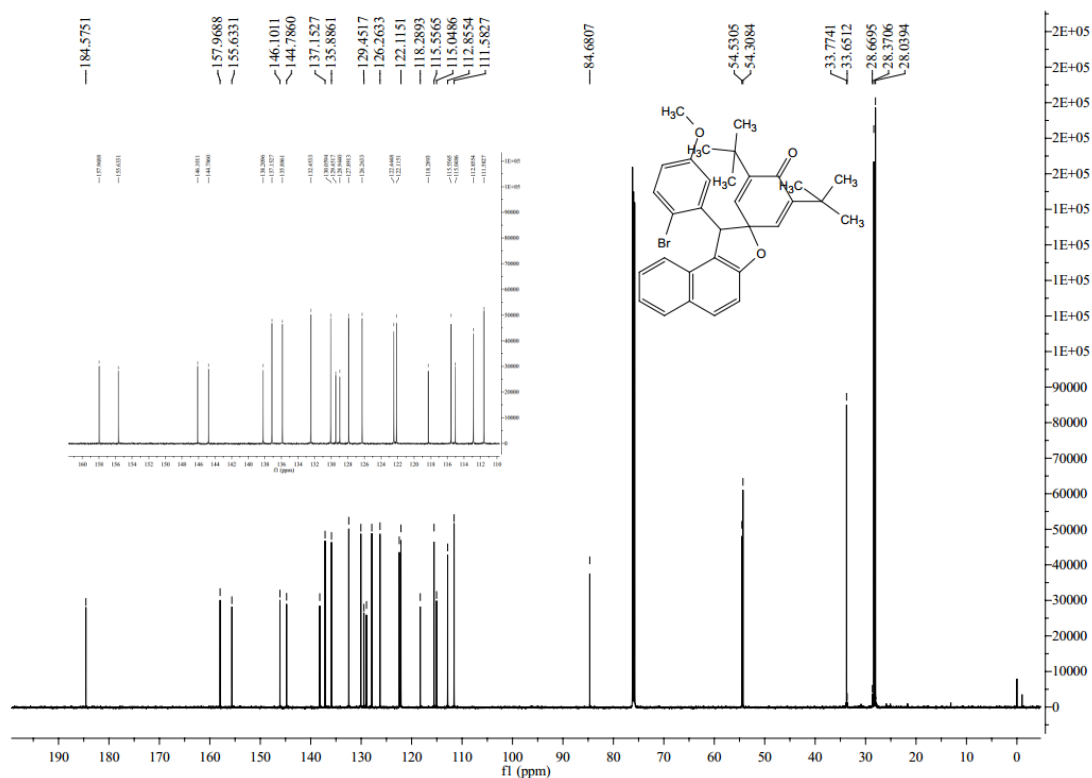

<sup>13</sup>C NMR Spectrum of **4i** (CDCl<sub>3</sub>, 150 MHz)

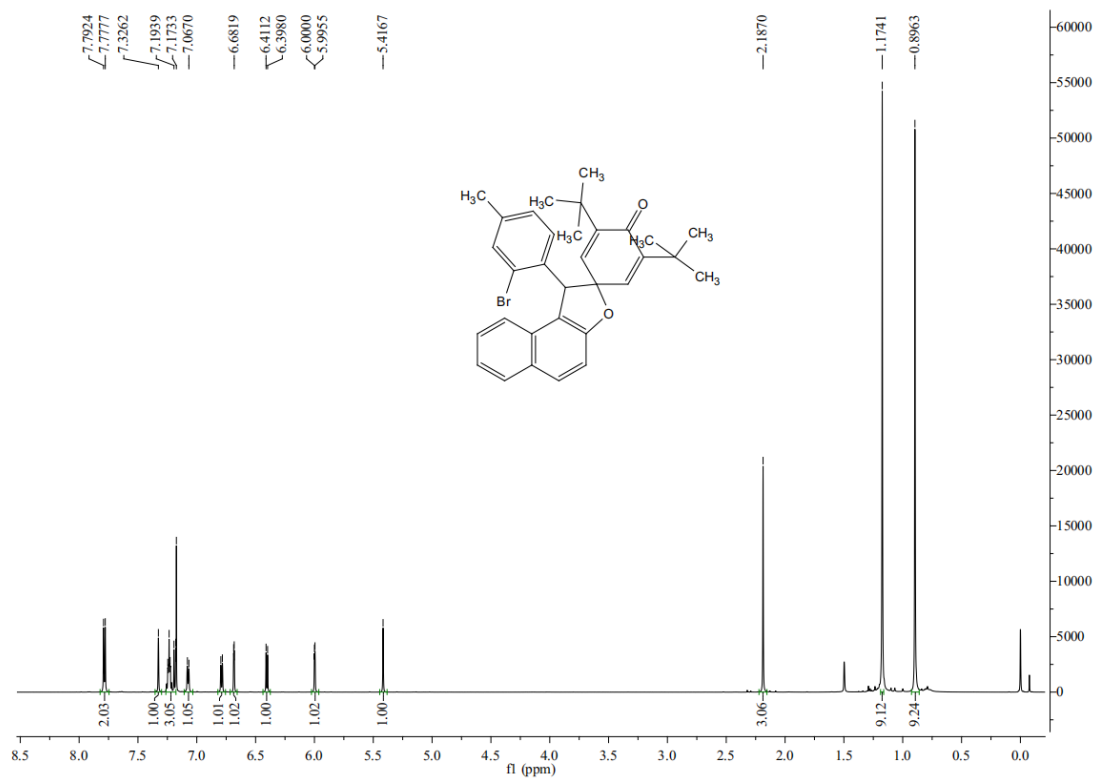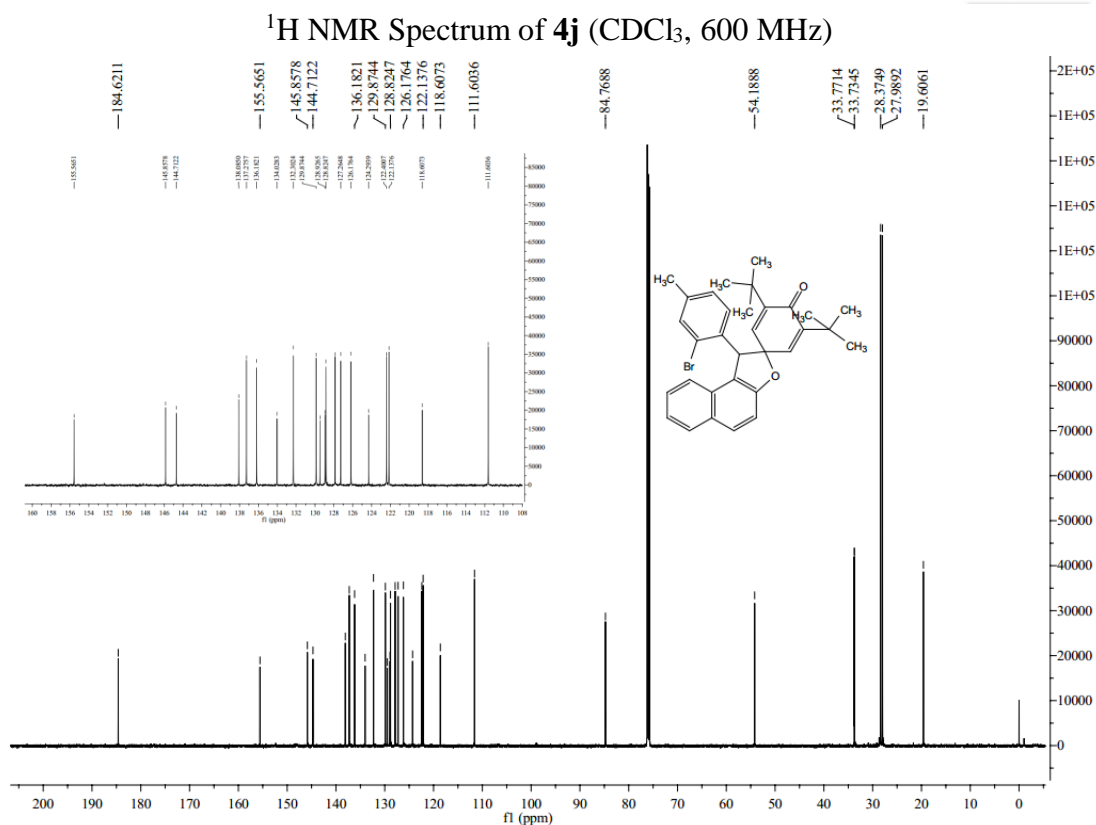

**<sup>13</sup>C NMR Spectrum of 4j (CDCl<sub>3</sub>, 150 MHz)**



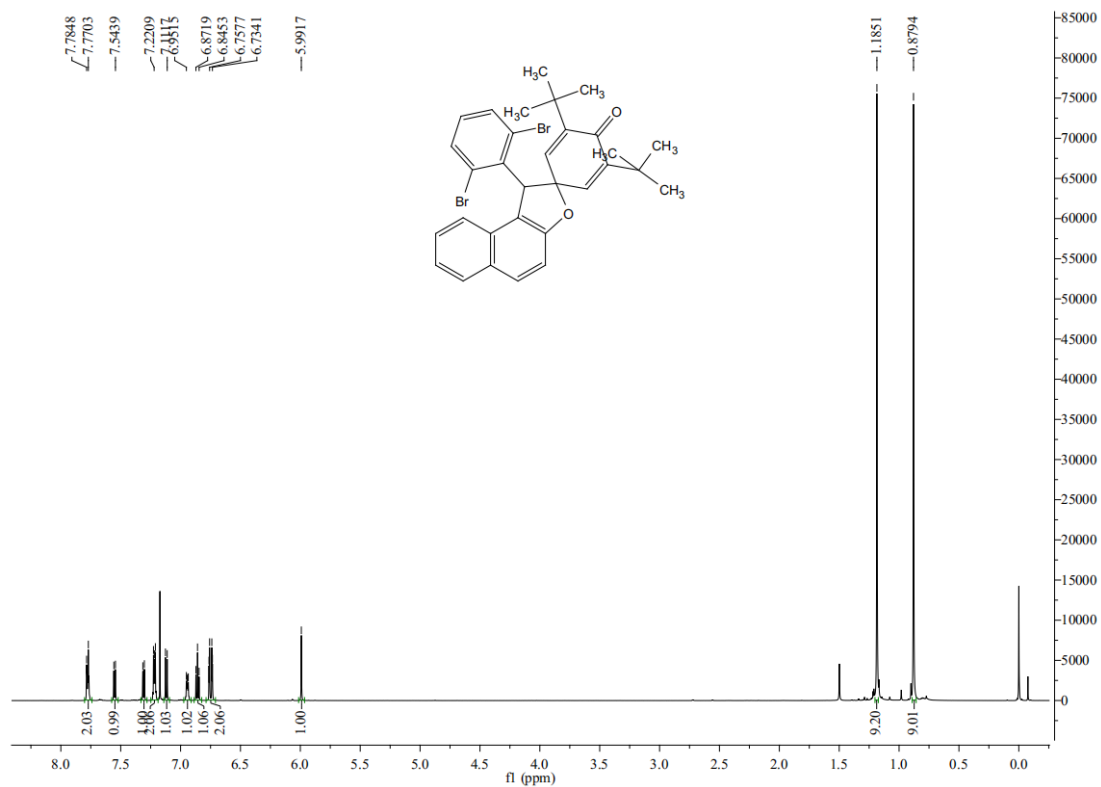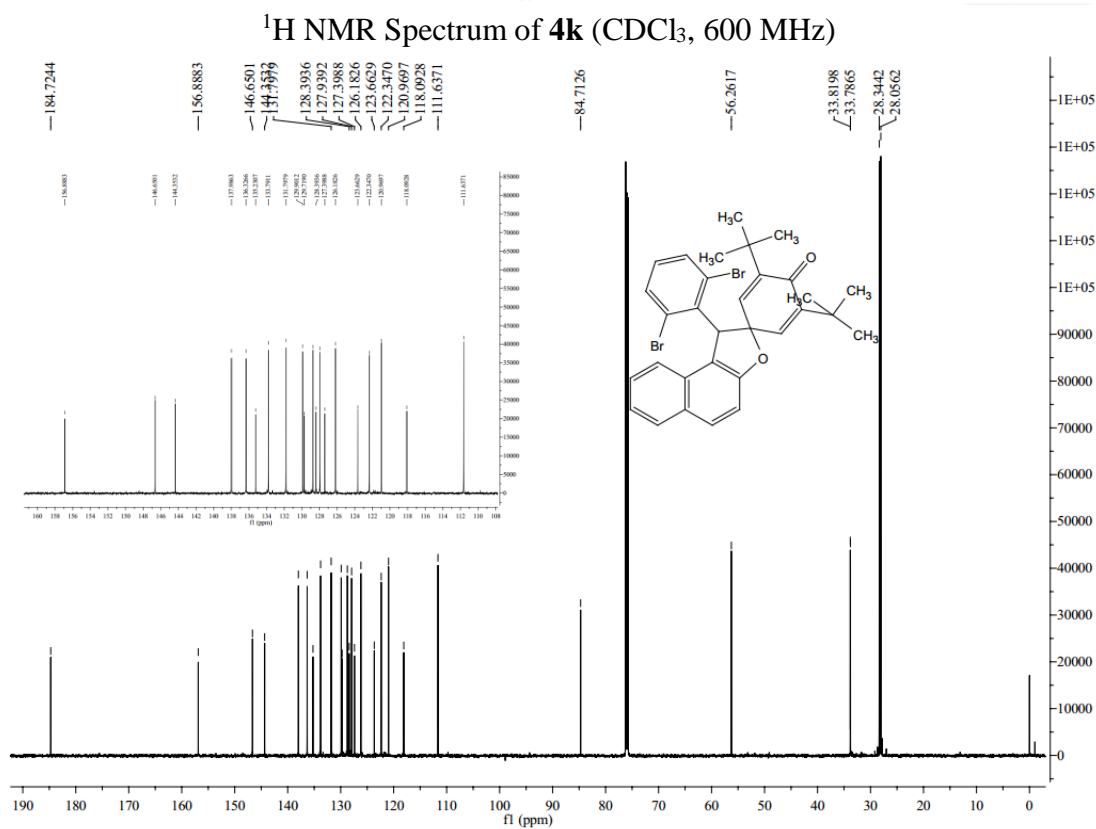

**<sup>13</sup>C NMR Spectrum of 4k (CDCl<sub>3</sub>, 150 MHz)**

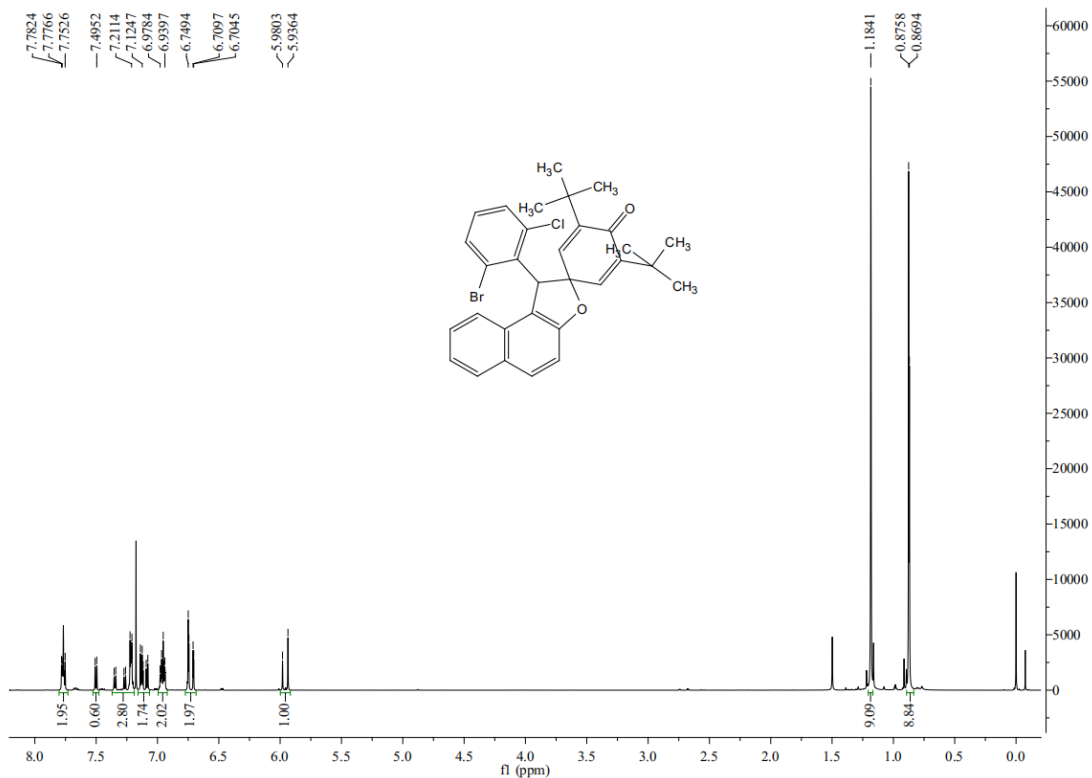

**<sup>1</sup>H NMR Spectrum of 4l (CDCl<sub>3</sub>, 600 MHz)**

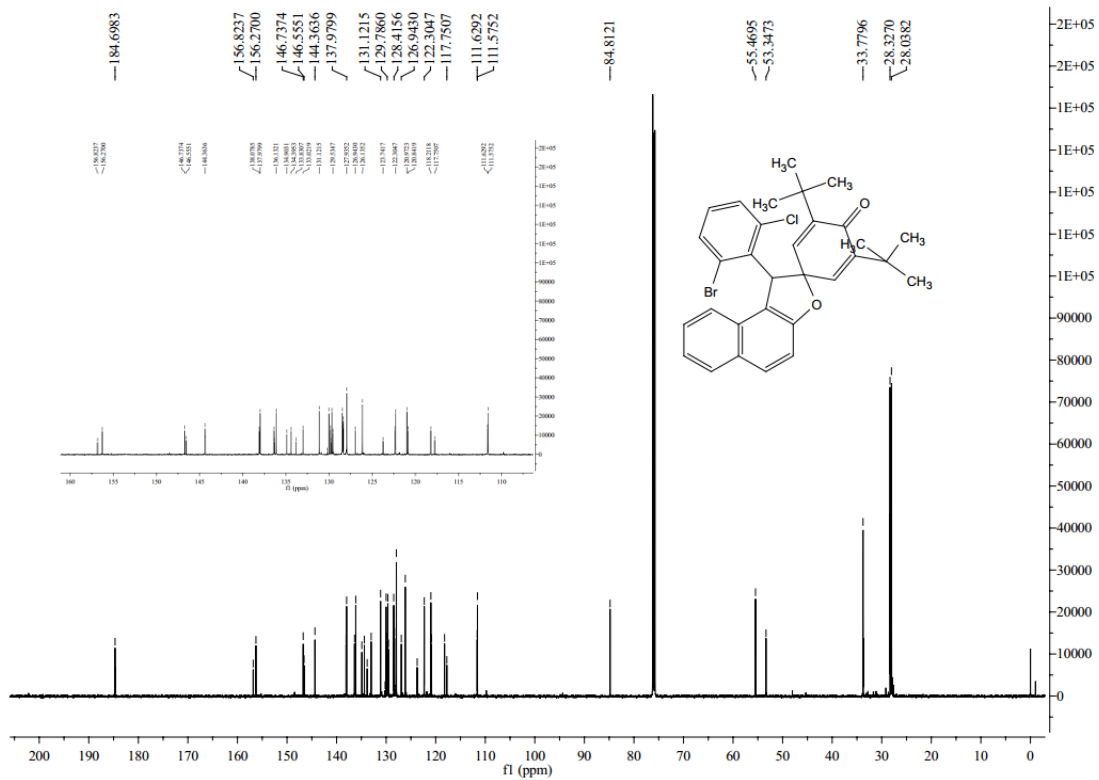

**<sup>13</sup>C NMR Spectrum of 4l (CDCl<sub>3</sub>, 150 MHz)**

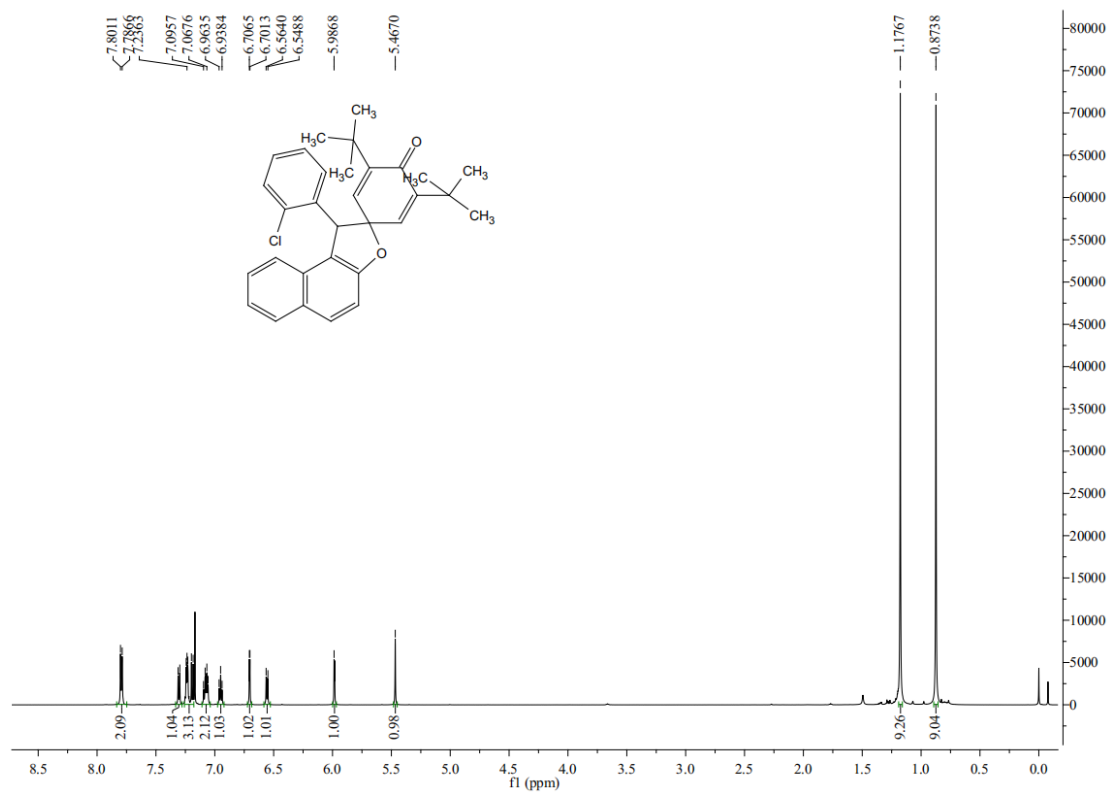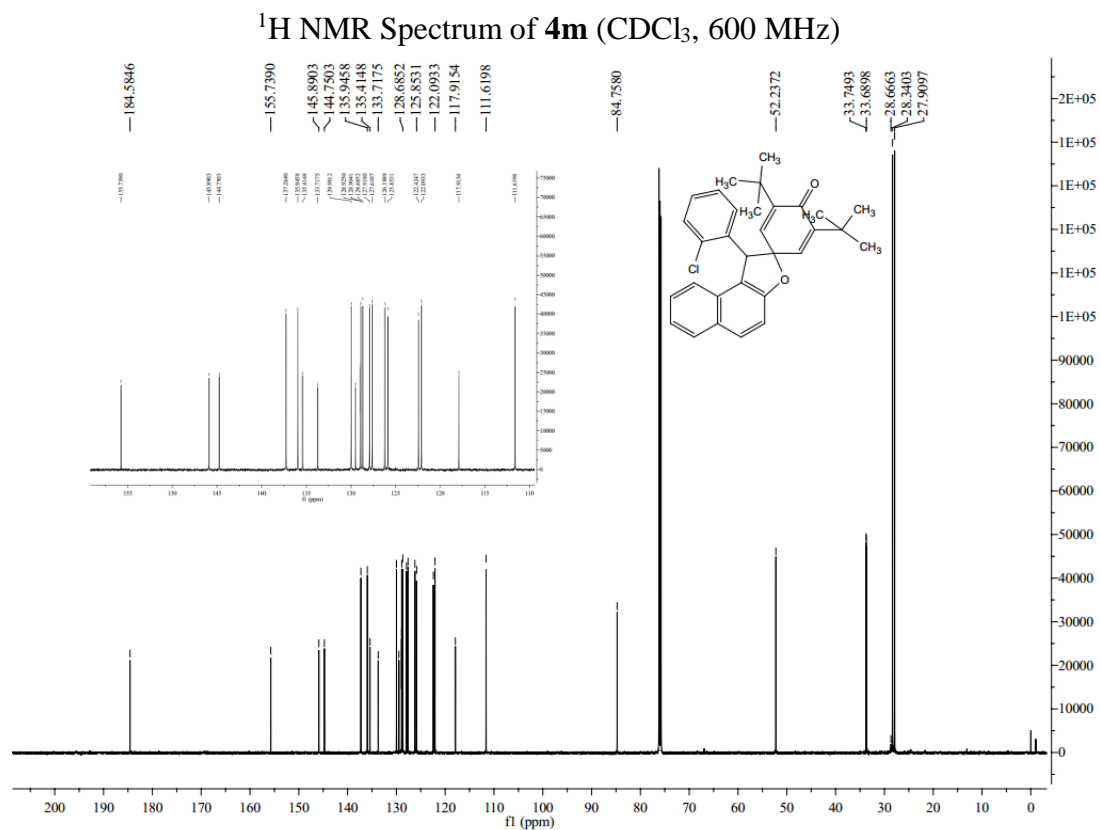

**<sup>13</sup>C NMR Spectrum of 4m (CDCl<sub>3</sub>, 150 MHz)**

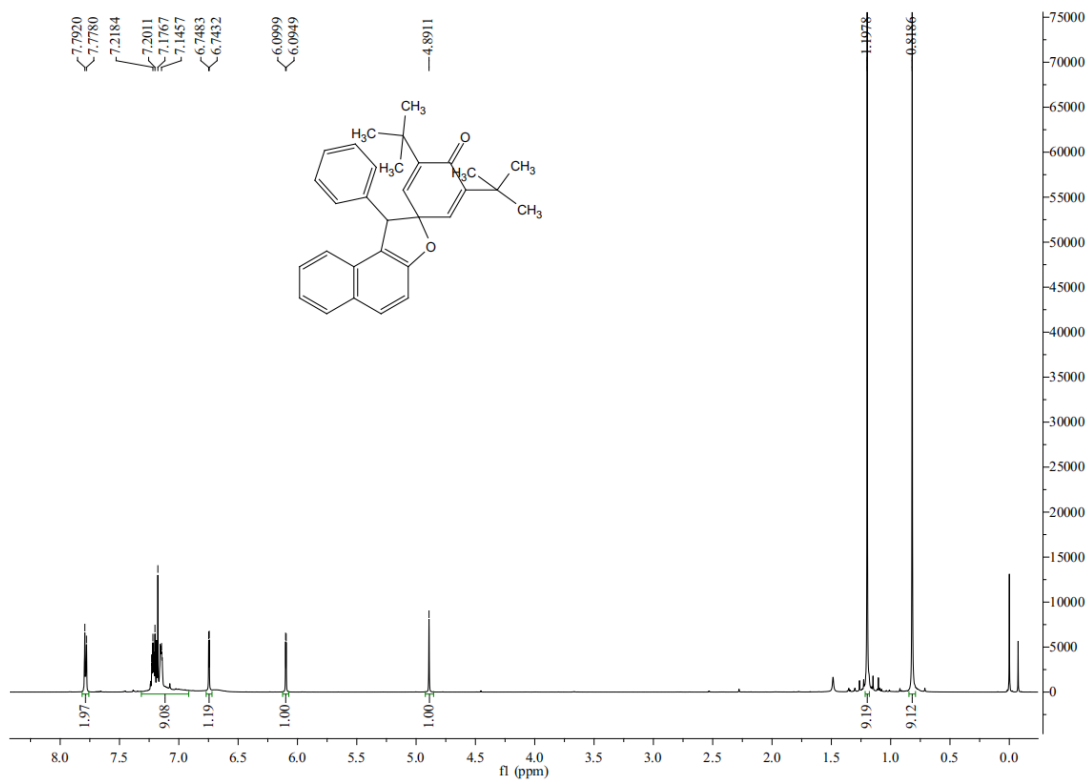

**<sup>1</sup>H NMR Spectrum of 4n (CDCl<sub>3</sub>, 600 MHz)**

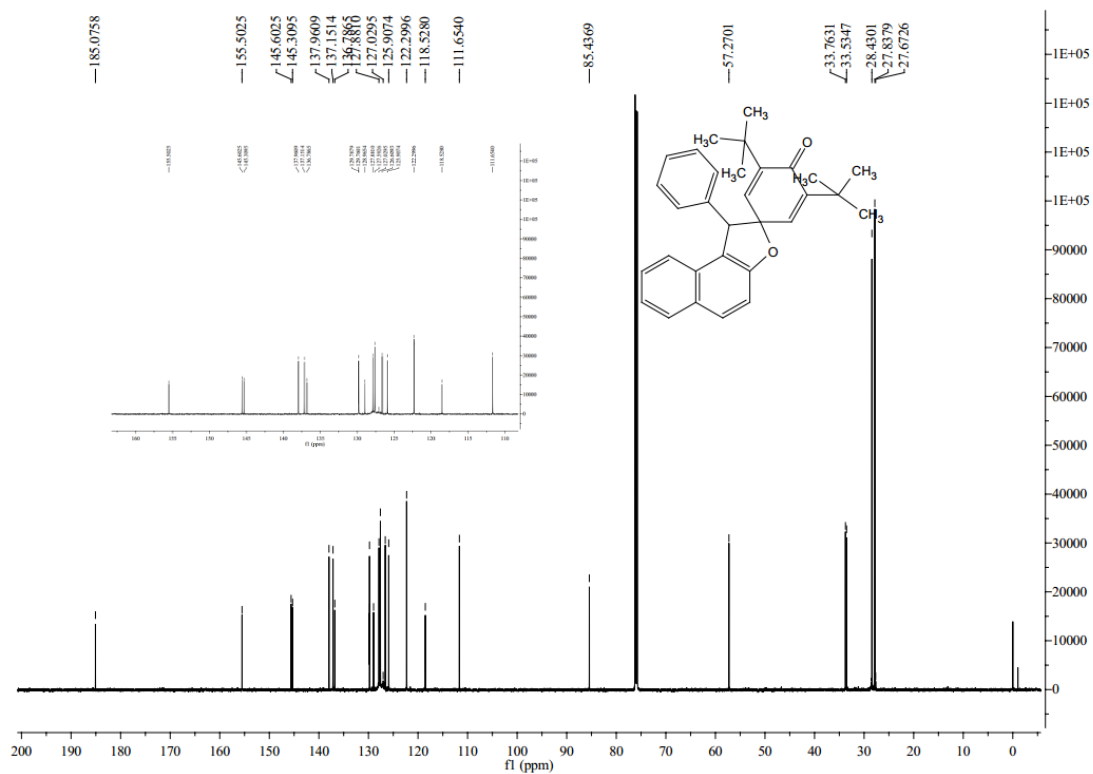

**<sup>13</sup>C NMR Spectrum of 4n (CDCl<sub>3</sub>, 150 MHz)**

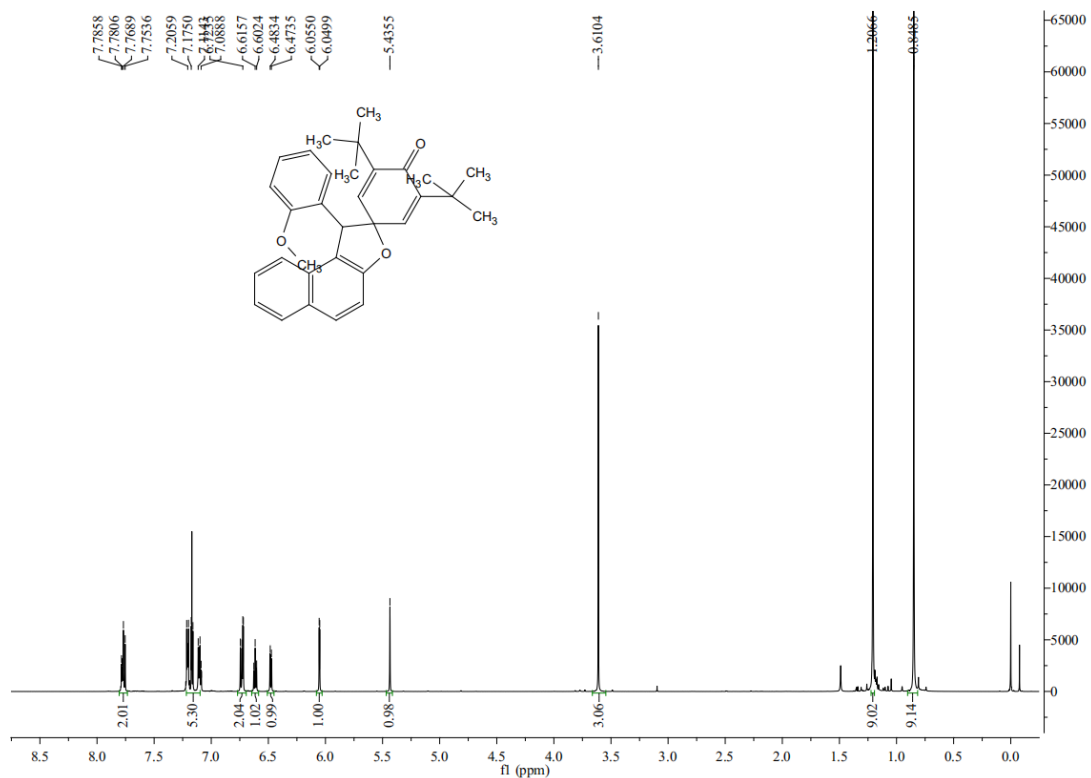

<sup>1</sup>H NMR Spectrum of **4o** (CDCl<sub>3</sub>, 600 MHz)

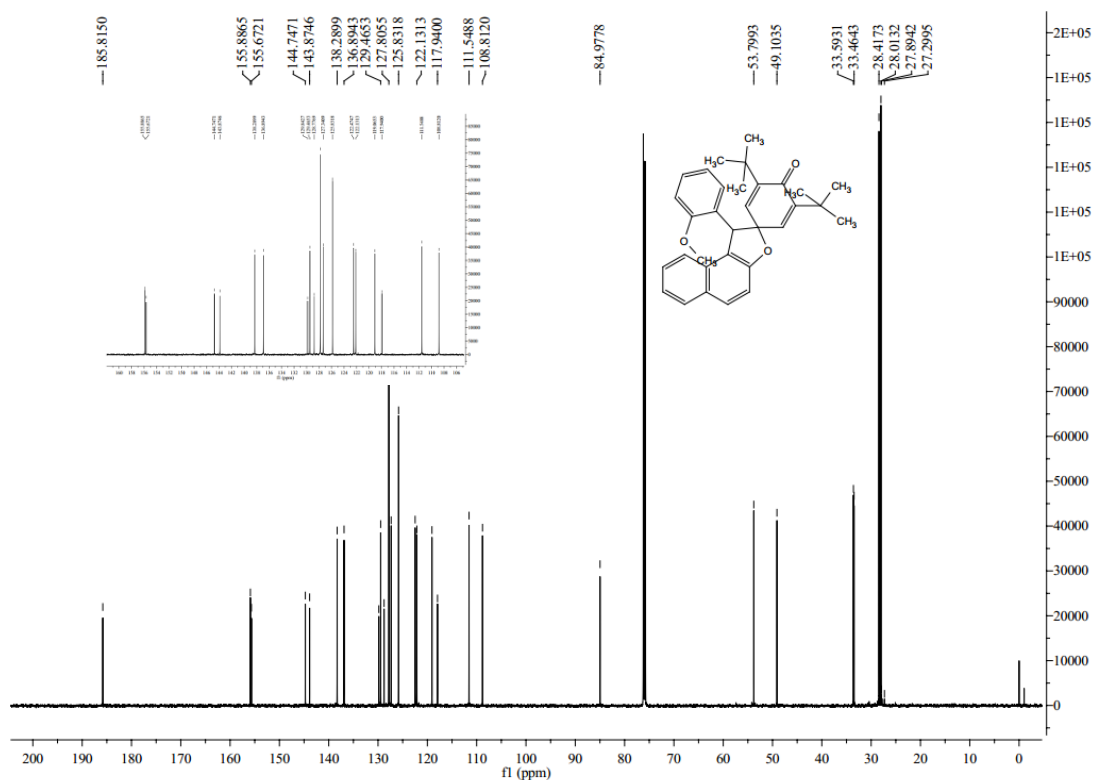

<sup>13</sup>C NMR Spectrum of **4o** (CDCl<sub>3</sub>, 150 MHz)

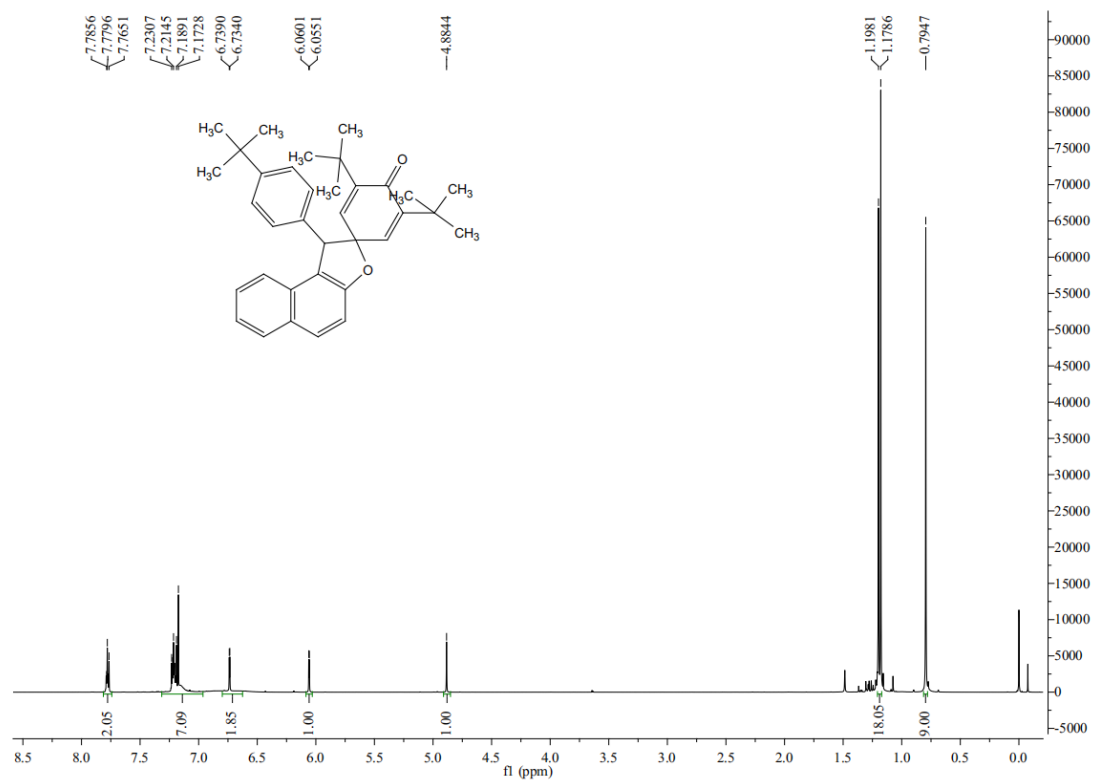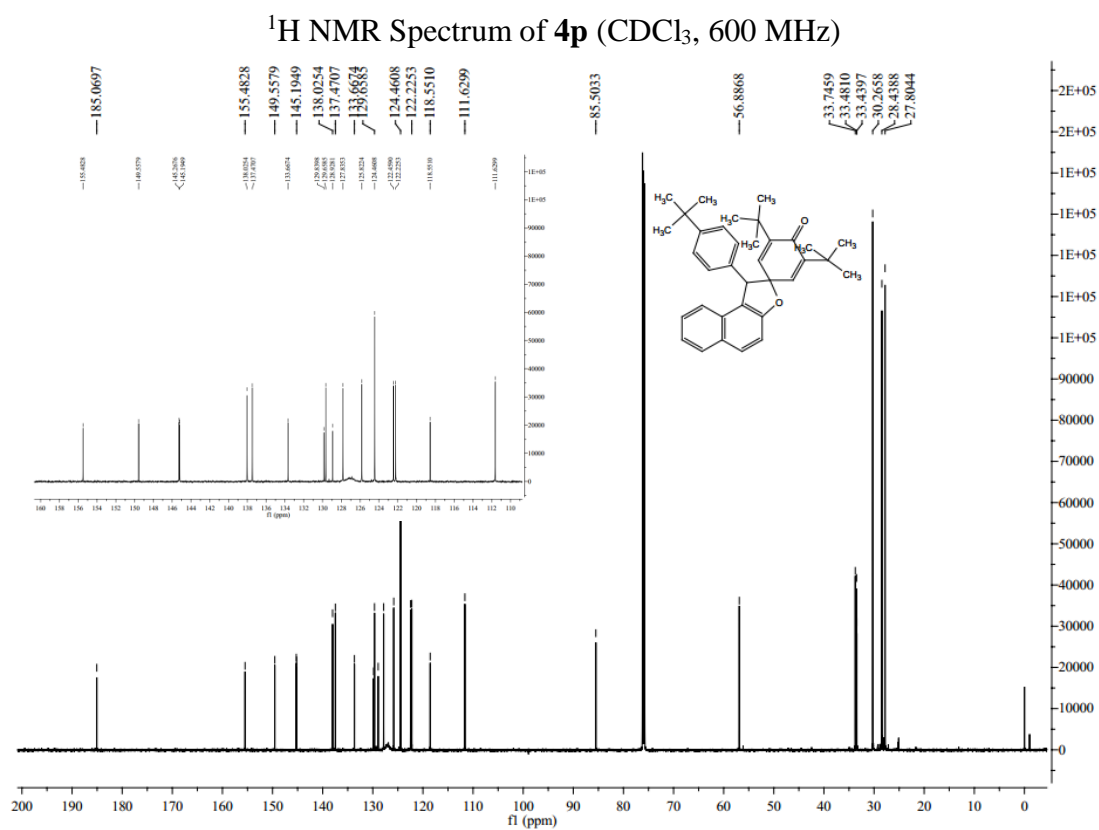

**<sup>13</sup>C NMR Spectrum of 4p (CDCl<sub>3</sub>, 150 MHz)**

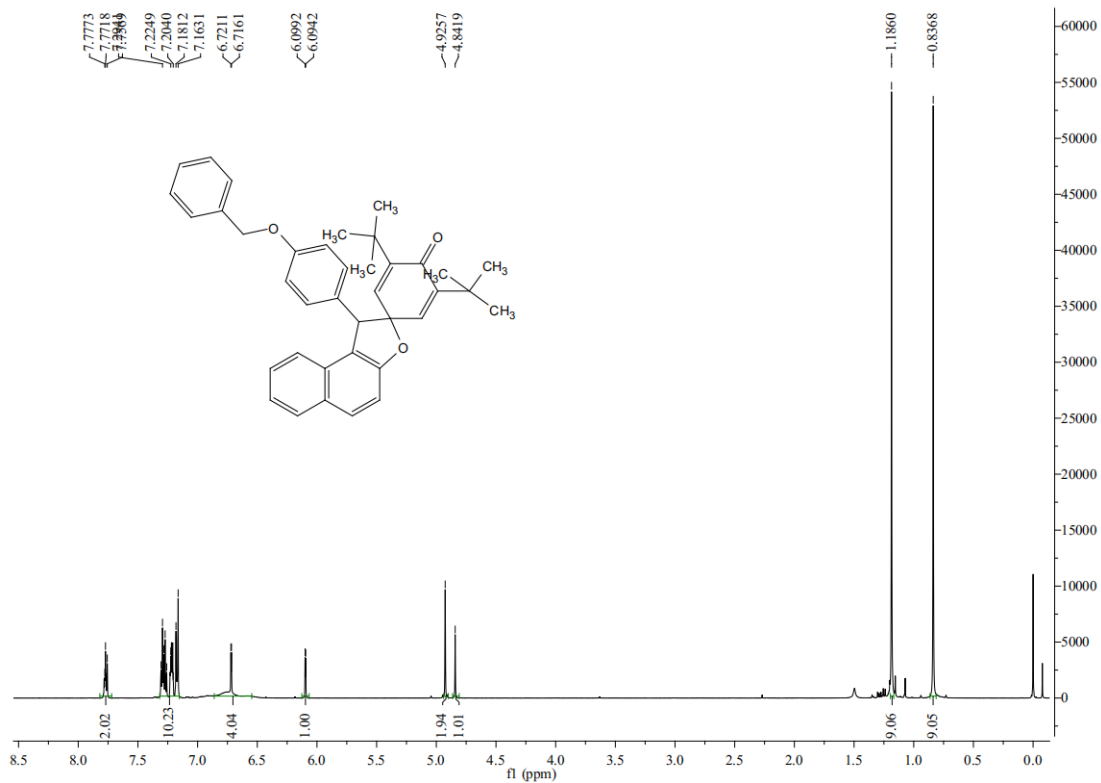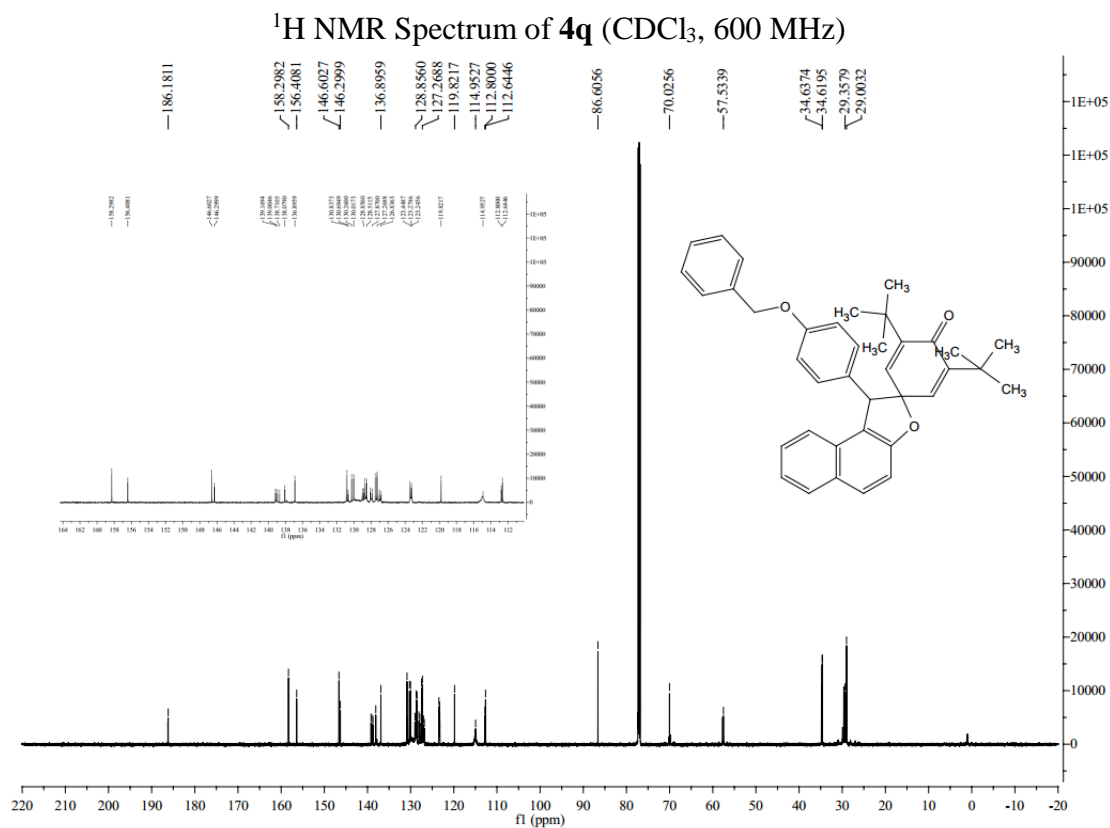

**<sup>13</sup>C NMR Spectrum of 4q (CDCl<sub>3</sub>, 150 MHz)**

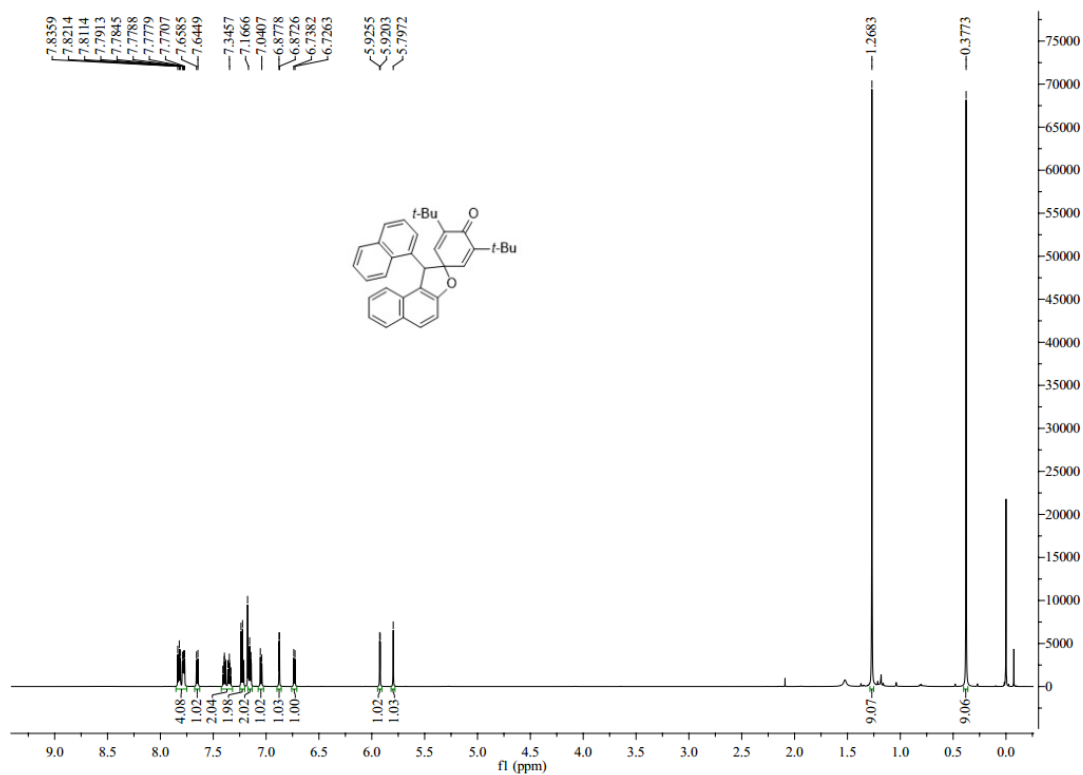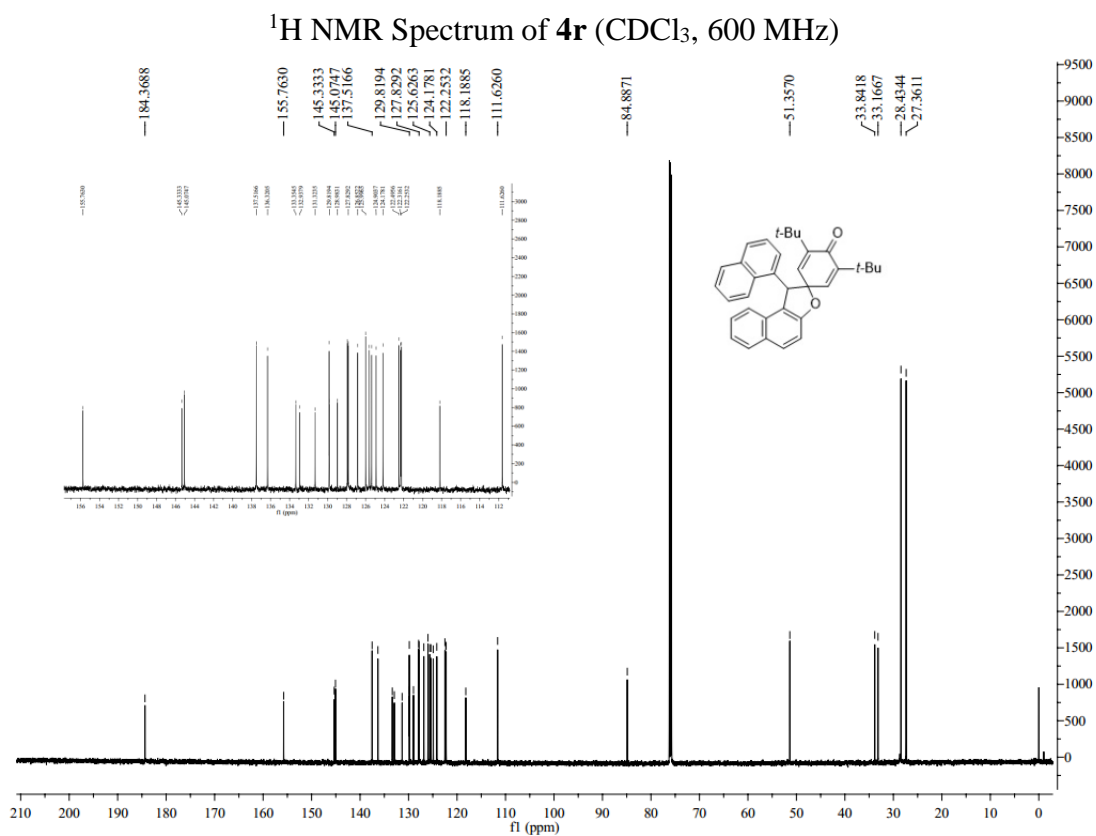

**<sup>13</sup>C NMR Spectrum of 4r (CDCl<sub>3</sub>, 150 MHz)**



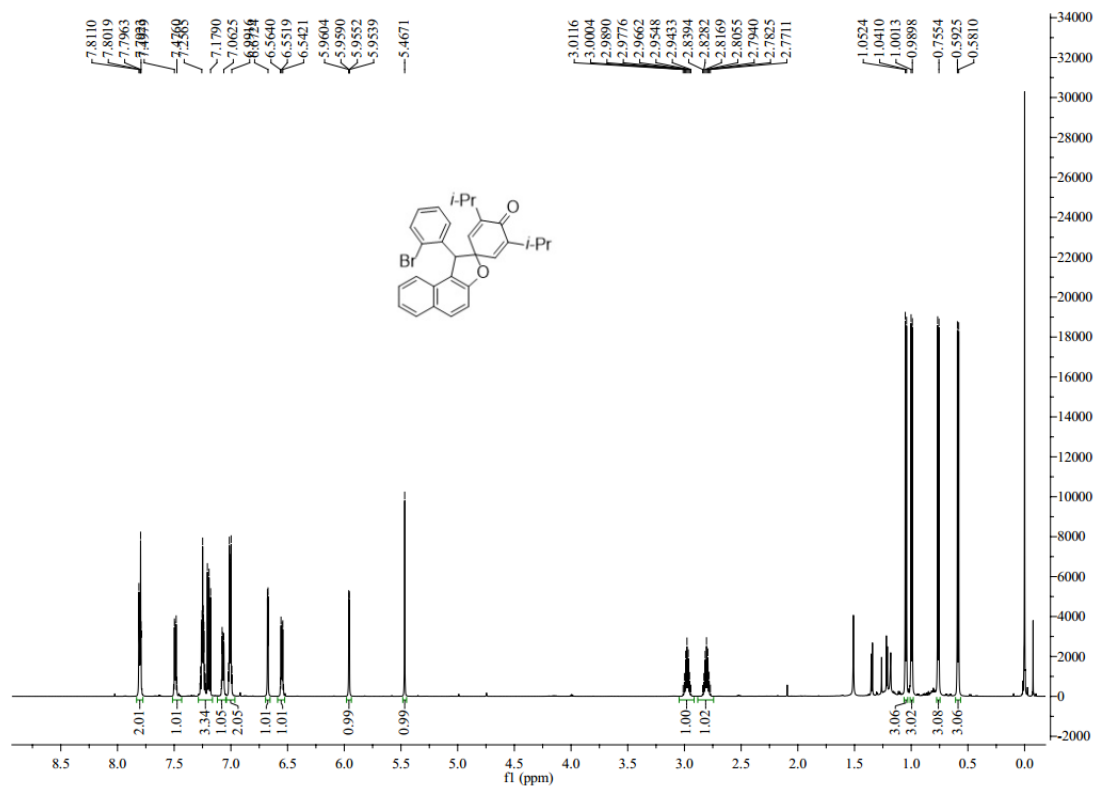

**<sup>1</sup>H NMR Spectrum of 4s (CDCl<sub>3</sub>, 600 MHz)**

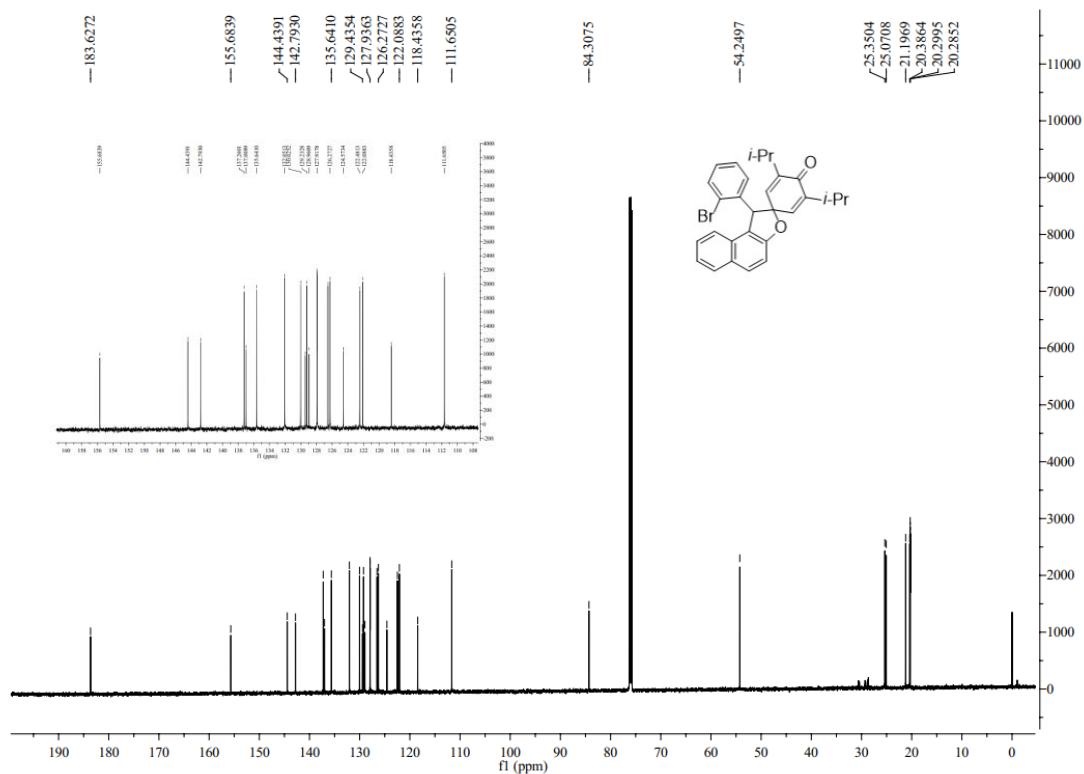

**<sup>13</sup>C NMR Spectrum of 4s (CDCl<sub>3</sub>, 150 MHz)**

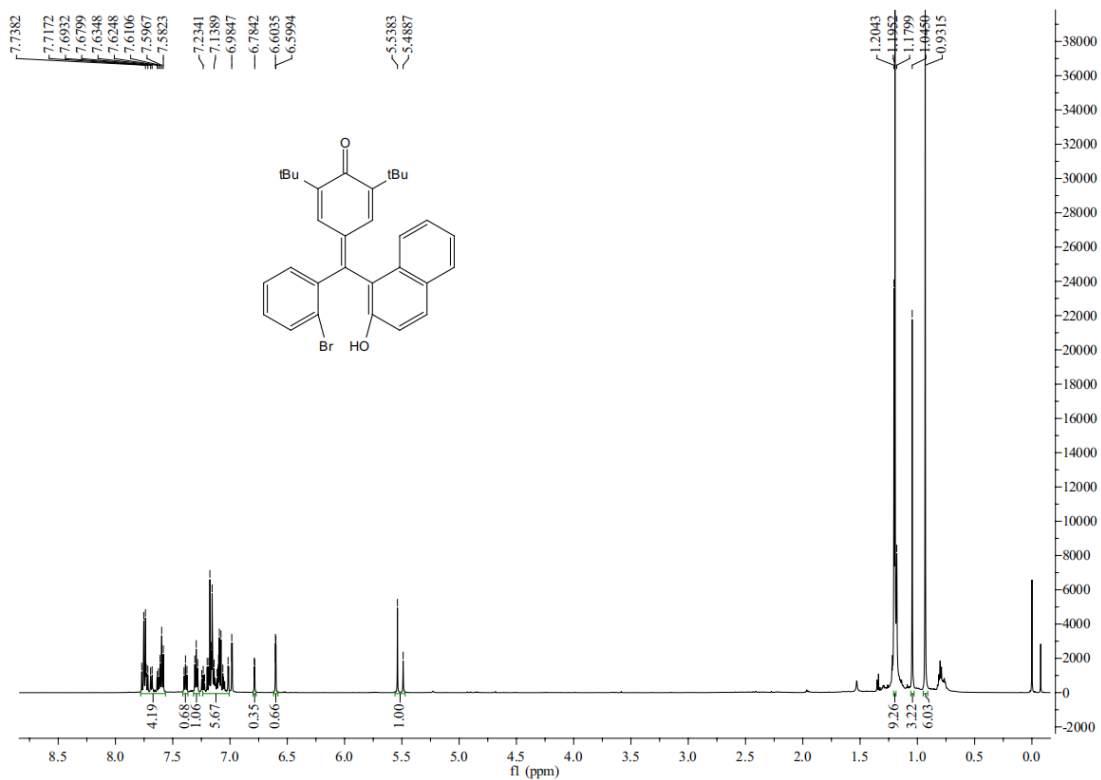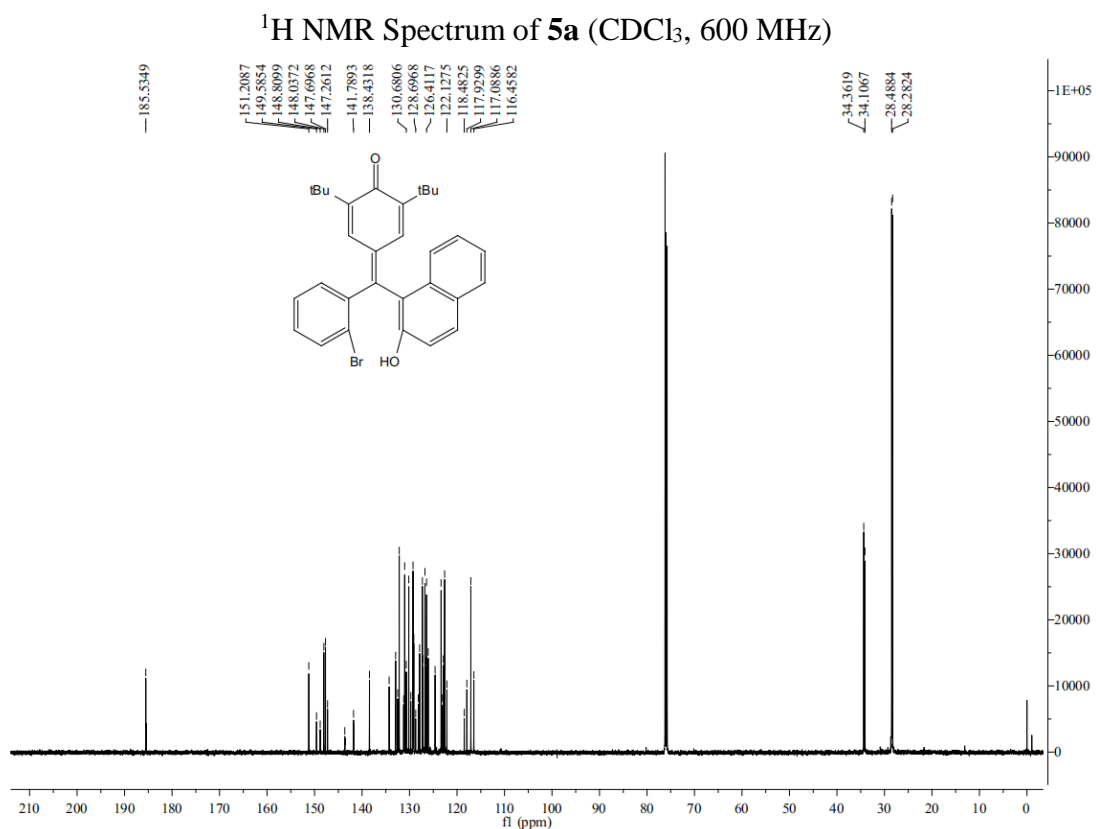

**<sup>13</sup>C NMR Spectrum of 5a (CDCl<sub>3</sub>, 150 MHz)**

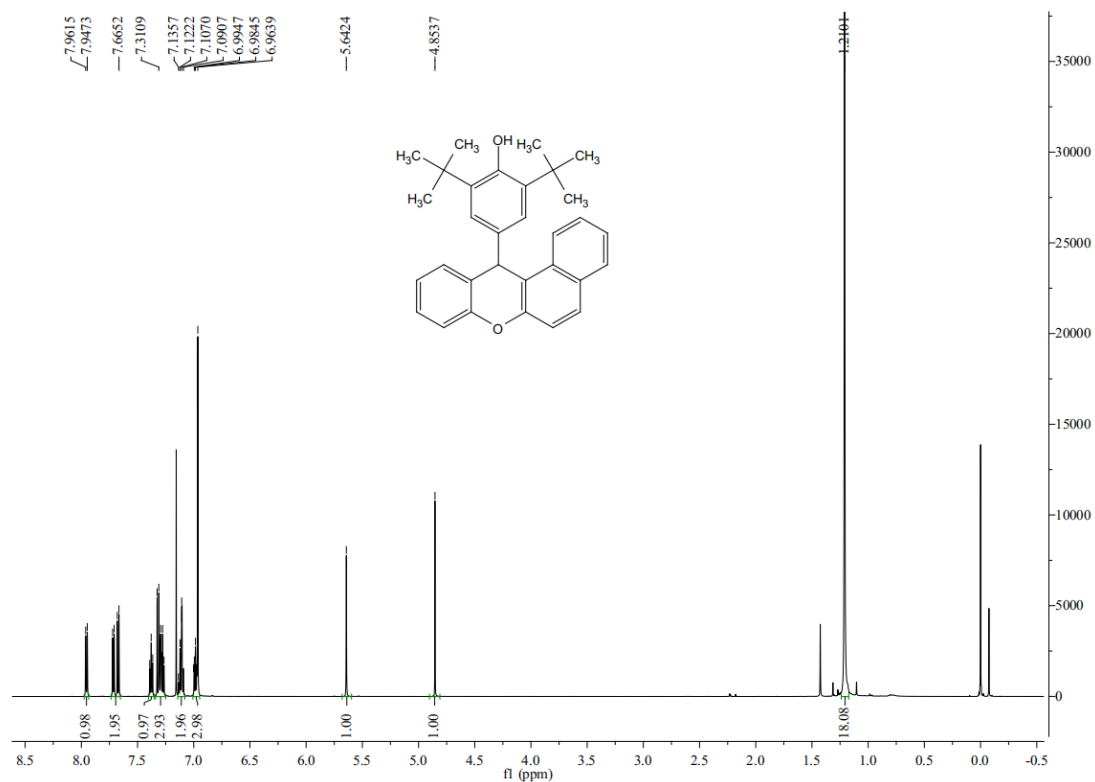

<sup>1</sup>H NMR Spectrum of **6** (CDCl<sub>3</sub>, 600 MHz)

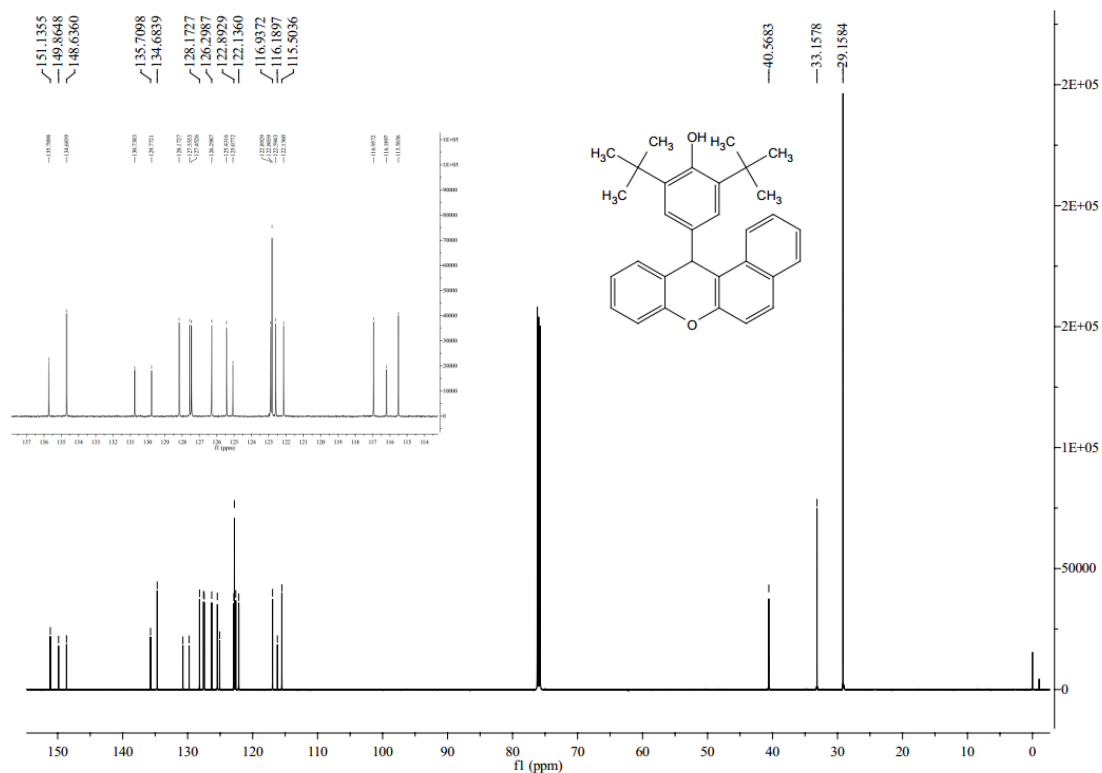

<sup>13</sup>C NMR Spectrum of **6** (CDCl<sub>3</sub>, 150 MHz)

## 11. Single-Crystal X-ray Crystallography of 2a', 3a, 4a and 5a

Single-Crystal X-ray Crystallography of Product **2a'** (CCDC number: 2116525)

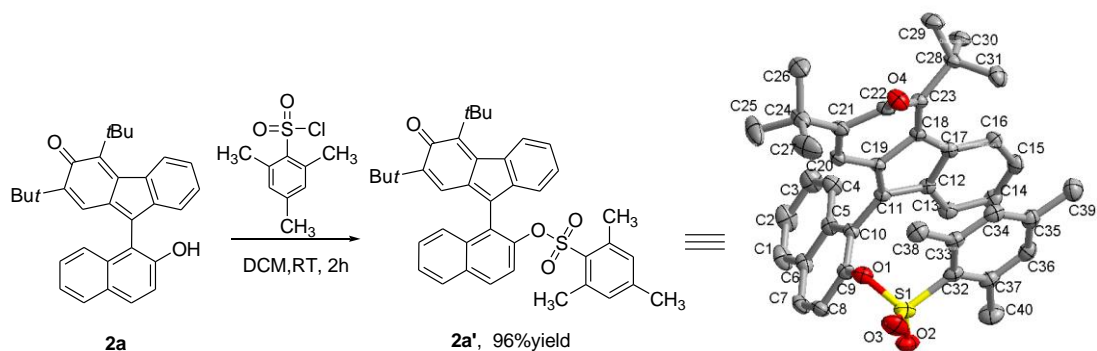

Bond precision: C-C = 0.0026 Å Wavelength=1.54184

Cell: a=17.6560(2) b=12.29932(13) c=17.8070(2)

alpha=90 beta=101.2817(11) gamma=90

Temperature: 293 K

|                        | Calculated               | Reported     |
|------------------------|--------------------------|--------------|
| Volume                 | 3792.19(7)               | 3792.21(8)   |
| Space group            | P 21/c                   | P 1 21/c 1   |
| Hall group             | -P 2ybc                  | -P 2ybc      |
| Moiety formula         | C40 H40 O4 S [+ solvent] | C40 H40 O4 S |
| Sum formula            | C40 H40 O4 S [+ solvent] | C40 H40 O4 S |
| Mr                     | 616.78                   | 616.78       |
| Dx, g cm <sup>-3</sup> | 1.080                    | 1.080        |
| Z                      | 4                        | 4            |
| Mu (mm <sup>-1</sup> ) | 1.035                    | 1.035        |
| F000                   | 1312.0                   | 1312.0       |
| F000'                  | 1316.88                  |              |
| h,k,lmax               | 21,14,21                 | 21,14,21     |
| Nref 6762 6753         |                          |              |
| Tmin,Tmax              | 0.851,0.883              | 0.868,1.000  |
| Tmin'                  | 0.847                    |              |

Correction method= # Reported T Limits: Tmin=0.868 Tmax=1.000

AbsCorr = MULTI-SCAN

Data completeness= 0.999

Theta(max)= 67.072

R(reflections)= 0.0449( 5440)

wR2(reflections)= 0.1302( 6753)

S = 1.031

Npar= 415

Single-Crystal X-ray Crystallography of Product **3a** (CCDC number: 2116523)

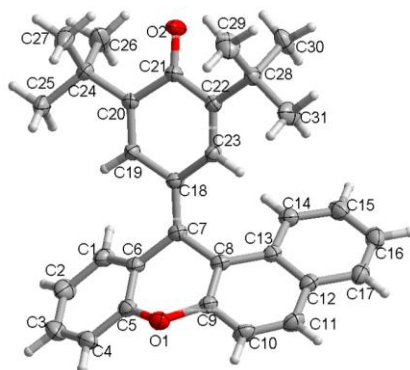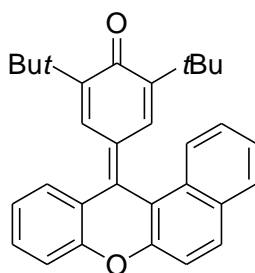

Bond precision:

C-C = 0.0027 Å

Wavelength=1.54184

Cell: a=10.8263(3)

b=21.7654(4)

c=11.6633(4)

alpha=90

beta=117.279(4)

gamma=90

Temperature: 293 K

|                | Calculated  | Reported    |
|----------------|-------------|-------------|
| Volume         | 2442.67(15) | 2442.67(13) |
| Space group    | P 21/c      | P 1 21/c 1  |
| Hall group     | -P 2ybc     | -P 2ybc     |
| Moiety formula | C31 H30 O2  | C31 H30 O2  |
| Sum formula    | C31 H30 O2  | C31 H30 O2  |
| Mr             | 434.55      | 434.55      |
| Dx,g cm-3      | 1.182       | 1.182       |
| Z              | 4           | 4           |
| Mu (mm-1)      | 0.559       | 0.559       |
| F000           | 928.0       | 928.0       |
| F000'          | 930.53      |             |
| h,k,lmax       | 12,26,13    | 12,26,13    |
| Nref           | 4346        | 4339        |
| Tmin,Tmax      | 0.904,0.946 | 0.549,1.000 |
| Tmin'          | 0.889       |             |

Correction method= # Reported T Limits: T<sub>min</sub>=0.549 T<sub>max</sub>=1.000

AbsCorr = MULTI-SCAN

Data completeness= 0.998

Theta(max)= 67.063

R(reflections)= 0.0429( 3487)

wR2(reflections)= 0.1292( 4339)

S = 1.060 Npar= 305

Single-Crystal X-ray Crystallography of Product **4a** (CCDC number: 2116524)

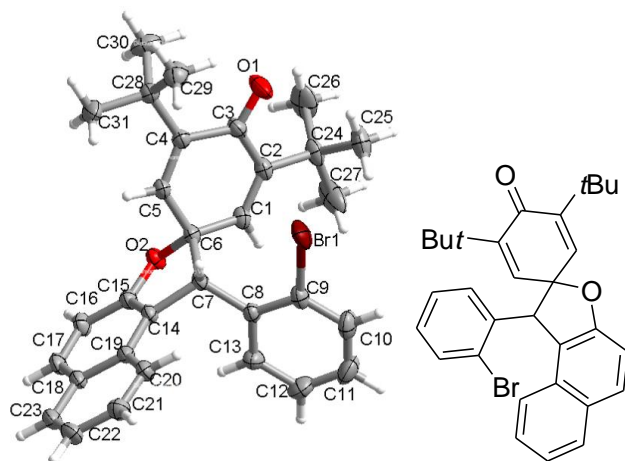

Bond precision:

C-C = 0.0034 Å

Wavelength=1.54184

Cell:

a=18.8373(4)

b=11.7899(3)

c=27.1076(7)

alpha=90

beta=105.181(2)

gamma=90

Temperature:

293 K

|                                     | Calculated                | Reported      |
|-------------------------------------|---------------------------|---------------|
| Volume                              | 5810.2(3)                 | 5810.3(2)     |
| Space group                         | C 2/c                     | C 1 2/c 1     |
| Hall group                          | -C 2yc                    | -C 2yc        |
| Moiety formula                      | C31 H31 Br O2 [+ solvent] | C31 H31 Br O2 |
| Sum formula                         | C31 H31 Br O2 [+ solvent] | C31 H31 Br O2 |
| Mr                                  | 515.46                    | 515.47        |
| D <sub>x</sub> , g cm <sup>-3</sup> | 1.179                     | 1.179         |
| Z                                   | 8                         | 8             |
| Mu (mm <sup>-1</sup> )              | 2.095                     | 2.095         |
| F000                                | 2144.0                    | 2144.0        |
| F000'                               | 2143.63                   |               |

|           |             |             |
|-----------|-------------|-------------|
| h,k,lmax  | 22,14,32    | 22,14,32    |
| Nref      | 5184        | 5147        |
| Tmin,Tmax | 0.767,0.811 | 0.857,1.000 |
| Tmin'     | 0.696       |             |

Correction method= # Reported T Limits: Tmin=0.857 Tmax=1.000

AbsCorr = MULTI-SCAN

Data completeness= 0.993      Theta(max)= 67.075

R(reflections)= 0.0406( 4540)      wR2(reflections)= 0.1168( 5147)

S = 1.022      Npar= 313

Single-Crystal X-ray Crystallography of Product **5a** (CCDC number: 2127166)

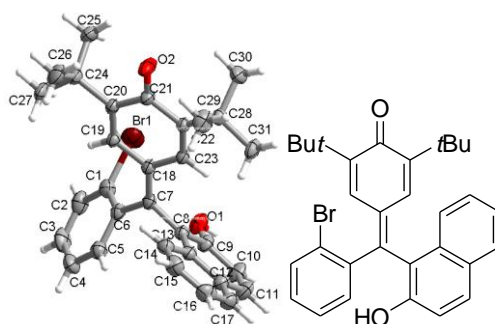

Bond precision:      C-C = 0.0071 Å      Wavelength=1.54184

Cell:      a=11.4412(3)      b=13.3055(4)      c=21.0185(6)  
           alpha=107.066(2)      beta=90.028(2)      gamma=112.861(3)

Temperature:      293 K

|                | Calculated               | Reported                 |
|----------------|--------------------------|--------------------------|
| Volume         | 2794.60(16)              | 2794.59(14)              |
| Space group    | P -1                     | P -1                     |
| Hall group     | -P 1                     | -P 1                     |
| Moiety formula | 2(C31 H31 Br O2), C H4 O | 2(C31 H31 Br O2), C H4 O |
| Sum formula    | C63 H66 Br2 O5           | C63 H66 Br2 O5           |
| Mr             | 1062.96                  | 1062.97                  |
| Dx,g cm-3      | 1.263                    | 1.263                    |
| Z              | 2                        | 2                        |
| Mu (mm-1)      | 2.206                    | 2.206                    |

|           |             |             |
|-----------|-------------|-------------|
| F000      | 1108.0      | 1108.0      |
| F000'     | 1107.95     |             |
| h,k,lmax  | 13,15,25    | 13,15,25    |
| Nref      | 9984        | 9972        |
| Tmin,Tmax | 0.809,0.896 | 0.962,1.000 |
| Tmin'     | 0.751       |             |

Correction method= # Reported T Limits: Tmin=0.962 Tmax=1.000

AbsCorr = MULTI-SCAN

Data completeness= 0.999

Theta(max)= 67.078

R(reflections)= 0.0667( 7068)

wR2(reflections)=0.2103( 9972)

S = 1.009

Npar= 656
